# Supplementary material for: Synthesis of ureas in the bio-alternative solvent Cyrene
Source: Royal Society of Chemistry journal article supplement (doi:10.1039/c7gc00908a), 2017-01-01
Supplement: c7gc00908a1.pdf [file c7gc00908a1.pdf]

## Synthesis of Ureas in the Bio-alternative Solvent Cyrene

Liam Mistry, Kopano Mapesa, Thomas W. Bousfield and Jason E. Camp\*

Department of Chemical Sciences, University of Huddersfield  
Queensgate, Huddersfield, HD1 3DH, United Kingdom

|             |                                                        |            |
|-------------|--------------------------------------------------------|------------|
| <b>I.</b>   | <b>General Experimental Information .....</b>          | <b>S2</b>  |
| <b>II.</b>  | <b>Preparation of Ureas 6a-u .....</b>                 | <b>S2</b>  |
| <b>III.</b> | <b>Molar Efficiency Calculations .....</b>             | <b>S11</b> |
| <b>IV.</b>  | <b>References .....</b>                                | <b>S11</b> |
| <b>V.</b>   | <b><sup>1</sup>H and <sup>13</sup>C NMR Data .....</b> | <b>S12</b> |

## I. General Experimental Information

Unless otherwise indicated, all commercially available reagents and solvents were used directly from the supplier without further purification.  $^1\text{H}$  NMR,  $^{13}\text{C}$  NMR and  $^{19}\text{F}$  NMR were recorded at ambient temperature in  $\text{CDCl}_3$  (7.27 ppm). Chemical shift values are expressed as parts per million (ppm) and J values are in Hertz. Splitting patterns are indicated as s: singlet, d: doublet, t: triplet, q: quartet or combination, br.s broad singlet or m: multiplet. The melting points reported are uncorrected. All reactions were performed in 5 mL microwave vials with Teflon coated caps. In addition to the amines **5** outlined below, the following amines proved incompatible with the reaction conditions: aniline, benzylamine, proline·HCl, indole, imidazole, 2,5-dimethyl pyrrole, pyrrole and pipercolic acid.

## II. Preparation of Ureas 6a-u

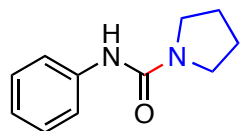

### *N*-Phenylpyrrolidine-1-carboxamide (**6a**)<sup>1</sup>

**Method A:** To a stirred solution of pyrrolidine (42  $\mu\text{L}$ , 0.5 mmol) in Cyrene (0.5 mL, 1 M) at 0 °C was added phenyl isocyanate (**4a**, 55  $\mu\text{L}$ , 0.5 mmol). The resultant mixture was allowed to warm to r.t. over 1 h. Water (5 mL) was added and the mixture was stirred for 30 min. The solvent was removed by Buchner filtration and the filtrate was washed with water (60 mL). The residue was dissolved in EtOAc (20 mL), dried over anhydrous sodium sulfate and the solvent was removed under reduced pressure to give *N*-phenylpyrrolidine-1-carboxamide (**6a**, 76 mg, 80%), as a white solid.

**Method B:** To a stirred solution of pyrrolidine (42  $\mu\text{L}$ , 0.5 mmol) in Cyrene (0.5 mL, 1 M) at 0 °C was added phenyl isocyanate (**4a**, 55  $\mu\text{L}$ , 0.5 mmol). The resultant mixture was allowed to warm to r.t. over 1 h. Water (5 mL) was added and the mixture was stirred for 30 min. Water (25 mL) and EtOAc (25 mL) were added. The organic layer was dried over  $\text{MgSO}_4$  (10.0 g), filtered with the aid of EtOAc (10 mL). Silica gel (100 mg) was added and the solvent was removed under reduced pressure. The residue was purified by flash column chromatography on silica gel (100 g; EtOAc:hexane, 9:1) to give *N*-phenylpyrrolidine-1-carboxamide (**6a**, 92 mg, 97%), as a white solid.

mp. (°C) 133-134 [Lit.<sup>1</sup> 133-134]; IR (neat): 3292, 2971, 2871, 1639, 1532, 1438, 1373, 1239, 759  $\text{cm}^{-1}$ ;  $^1\text{H}$  NMR ( $\text{CDCl}_3$ , 500 MHz)  $\delta$  1.92-1.94 (m, 4H), 3.42-3.45 (m, 4H), 6.29 (br. s, 1H), 6.98-7.01 (m, 1H), 7.24-2.28 (m, 2H), 7.40-7.42 (m, 2H);  $^{13}\text{C}$  NMR ( $\text{CDCl}_3$ , 125 MHz)  $\delta$  25.5, 45.7, 119.5, 122.6, 128.7, 139.2, 153.9; HRMS (ESI)  $m/z$  Calcd for  $[\text{C}_{11}\text{H}_{15}\text{N}_2\text{O}]^+$  191.1184; found 191.1179.

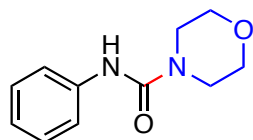

### ***N*-Phenylmorpholine-4-carboxamide (6b)**

To a stirred solution of morpholine (43  $\mu$ L, 0.50 mmol) in Cyrene (0.1 M) at 0  $^{\circ}$ C was added phenyl isocyanate (**4b**, 55  $\mu$ L, 0.50 mmol). The resultant mixture was stirred at rt for 1 h. Water (5 mL) was added and the precipitate was filtered and washed with water. The residue was dried over anhydrous sodium sulphate to give *N*-phenylmorpholine-4-carboxamide (**6b**, 61 mg, 64%) as a white solid. mp. ( $^{\circ}$ C) 157-158 [Lit.<sup>2</sup> 159-160] IR ( $\nu$  /cm<sup>-1</sup>): 3251, 3052, 2917, 2857, 1631, 1526; <sup>1</sup>H NMR (400 MHz, CDCl<sub>3</sub>)  $\delta$  3.45 (t,  $J$  = 5.0 Hz, 4H), 3.70 (t,  $J$  = 4.7 Hz, 4H), 6.52 (bs, 1 H), 7.03-7.60 (m, 1H), 7.26-7.29 (m, 2 H), 7.33-7.35 (m, 2H); <sup>13</sup>C NMR (400 MHz, CDCl<sub>3</sub>) 44.2, 66.4, 120.2, 123.3, 128.8, 138.6, 155.2; HRMS (ESI)  $m/z$  calculated for [C<sub>11</sub>H<sub>15</sub>N<sub>2</sub>O<sub>2</sub>]: 207.1134, Observed: 207.1131.

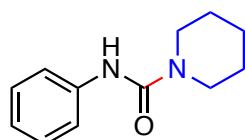

### ***N*-Phenylpiperidine-1-carboxamide (6c)**

To a stirred solution of piperidine (49  $\mu$ L, 0.50 mmol) in Cyrene (0.1 M) at 0  $^{\circ}$ C was added phenyl isocyanate (**4a**, 55  $\mu$ L, 0.50 mmol). The resultant mixture was stirred at rt for 1 h. Water (5 mL) was added and the precipitate was filtered and washed with water. The residue was dried over anhydrous sodium sulphate to give *N*-phenylpiperidine-1-carboxamide (**6c**, 62 mg, 61%) as a white solid. MP ( $^{\circ}$ C): 170-172 [Lit.<sup>7</sup> 171-172  $^{\circ}$ C]; IR ( $\nu$  /cm<sup>-1</sup>): 3284, 2924, 2854, 2359, 1626, 1533; <sup>1</sup>H NMR (400 MHz, CDCl<sub>3</sub>)  $\delta$  1.61-1.63 (m, 6H), 3.44-3.46 (m, 4H), 6.33 (bs, 1H), 6.99-7.03 (m, 1H), 7.25-7.29 (m, 2H), 7.34-7.36 (m, 2H); <sup>13</sup>C NMR (400 MHz, CDCl<sub>3</sub>) 24.6, 25.9, 45.5, 119.9, 123.0, 129.1, 139.4, 155.2; HRMS (ESI)  $m/z$  calculated for [C<sub>12</sub>H<sub>17</sub>N<sub>2</sub>O]<sup>+</sup>: 205.1341, Observed: 205.1335.

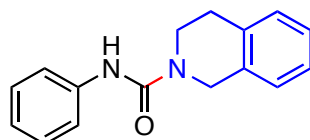

### ***N*-Phenyl-3,4-dihydroisoquinoline-2(1H)-carboxamide (6d)**

To a stirred solution of 1,2,3,4-tetrahydroisoquinoline (63  $\mu$ L, 0.5 mmol) in Cyrene (0.5 mL, 1 M) at 0  $^{\circ}$ C was added phenyl isocyanate (**4a**, 55  $\mu$ L, 0.5 mmol). The resultant mixture was allowed to warm to r.t. over 1 h. Water (5 mL) was added and the mixture was stirred for 30 min. The solvent was removed by Buchner filtration and the filtrate was washed with water (60 mL). The residue was dissolved in EtOAc (20 mL), dried over anhydrous sodium sulfate and the solvent was removed under reduced pressure to give *N*-phenyl-3,4-dihydroisoquinoline-2(1H)-carboxamide (**6d**, 103 mg, 82 %) as a white solid. mp. ( $^{\circ}$ C) 134–

135 [Lit.<sup>3</sup> 143-144]; IR (neat): 3316, 3030, 2917, 1627, 1594, 1525, 1444  $\text{cm}^{-1}$ ;  $^1\text{H}$  NMR ( $\text{CDCl}_3$ , 500 MHz)  $\delta$  2.91 (t,  $J = 5.9$  Hz, 2 H), 3.72 (t,  $J = 5.9$  Hz, 2H), 4.65 (s, 2H), 6.51 (bs, 1H), 7.01-7.04 (m, 1H), 7.12-7.21 (m, 4 H), 7.26-7.29 (m, 2H), 7.38-7.39 (m, 2H);  $^{13}\text{C}$  NMR ( $\text{CDCl}_3$ , 125 MHz)  $\delta$  29.0, 41.5, 45.7, 120.0, 123.1, 126.3, 126.5, 126.8, 128.3, 128.8, 133.0, 134.9, 138.9, 154.9; HRMS (ESI)  $m/z$  Calcd for  $[\text{C}_{16}\text{H}_{17}\text{N}_2\text{O}]^+$  253.1335; found 253.1335.

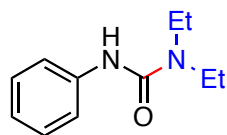

### 1,1-Diethyl-3-phenylurea (6e)

To a stirred solution of diethylamine (52  $\mu\text{L}$ , 0.50 mmol) in Cyrene (0.1 M) at 0  $^\circ\text{C}$  was added phenyl isocyanate (**4a**, 55  $\mu\text{L}$ , 0.50 mmol). The resultant mixture was stirred at rt for 1 h. Water (5 mL) was added and the precipitate was filtered and washed with water. The residue was dried over anhydrous sodium sulphate to give 1,1-diethyl-3-phenylurea (**6e**, 92 mg, 96%). as a white solid. mp. ( $^\circ\text{C}$ ) 79-81 [Lit.<sup>7</sup> 84-85]; IR (neat): 2981, 2361, 1752, 1635, 1529  $\text{cm}^{-1}$ ;  $^1\text{H}$  NMR ( $\text{CDCl}_3$ , 500 MHz)  $\delta$  1.23 (t,  $J = 7.2$  Hz, 6H), 3.37 (q,  $J = 7.2$  Hz, 4H), 6.55 (bs, 1H), 7.07-7.11 (m, 1H), 7.29-7.30 (m, 4H);  $^{13}\text{C}$  NMR ( $\text{CDCl}_3$ , 125 MHz)  $\delta$  13.5, 42.0, 121.3, 124.1, 128.9, 137.8, 155.8; HRMS (ESI)  $m/z$  Calcd for  $[\text{C}_{11}\text{H}_{17}\text{N}_2\text{O}]^+$  193.1335; found 193.1335.

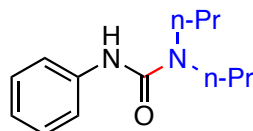

### 3-Phenyl-1,1-dipropylurea (6f)

To a stirred solution of dipropylamine (69  $\mu\text{L}$ , 0.50 mmol) in Cyrene (0.1 M) at 0  $^\circ\text{C}$  was added phenyl isocyanate (**4a**, 55  $\mu\text{L}$ , 0.50 mmol). The resultant mixture was stirred at rt for 1 h. Water (5 mL) was added and the precipitate was filtered and washed with water. The residue was dried over anhydrous sodium sulphate to give 1,1-dipropyl-3-phenylurea (**6f**, 49 mg, 44%). as a white solid. mp. ( $^\circ\text{C}$ ) 70-72 [Lit.<sup>4</sup> 71]; IR (neat): 3314, 2953, 2871, 2362, 1634  $\text{cm}^{-1}$ ;  $^1\text{H}$  NMR ( $\text{CDCl}_3$ , 500 MHz)  $\delta$  0.93 (t,  $J = 11.8$  Hz, 6H), 1.64 (sex,  $J = 9.4$  Hz, 4 H), 3.25 (t,  $J = 9.4$  Hz, 4 H), 6.36 (bs, 1 H), 6.97-7.01 (m, 1 H), 7.23-7.27 (m, 2 H), 7.36-7.38 (m, 2H);  $^{13}\text{C}$  NMR ( $\text{CDCl}_3$ , 125 MHz)  $\delta$  11.4, 21.8, 49.4, 119.8, 122.7, 128.7, 139.3, 155.0; HRMS (ESI)  $m/z$  Calcd for  $[\text{C}_{13}\text{H}_{21}\text{N}_2\text{O}]^+$  221.1648; found 221.648.

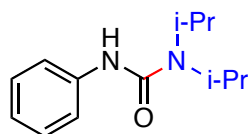

### 1,1-Diisopropyl-3-phenylurea (6g)

To a stirred solution of diisopropylamine (70  $\mu$ L, 0.50 mmol) in Cyrene (0.1 M) at 0  $^{\circ}$ C was added phenyl isocyanate (**4a**, 55  $\mu$ L, 0.50 mmol). The resultant mixture was stirred at rt for 1 h. Water (5 mL) was added and the precipitate was filtered and washed with water. The residue was dried over anhydrous sodium sulphate to give 1,1-diisopropyl-3-phenylurea (**6g**, 68 mg, 62%), as a white solid. mp. ( $^{\circ}$ C) 119-121 [Lit.<sup>5</sup> 113-115]; IR (neat): 3313, 2954, 2871, 1634  $\text{cm}^{-1}$ ;  $^1\text{H}$  NMR ( $\text{CDCl}_3$ , 500 MHz)  $\delta$  1.29 (d,  $J$  = 8.6 Hz, 12 H), 3.94 (sept,  $J$  = 8.6 Hz, 2 H), 6.31 (bs, 1H), 6.96-6.99 (m, 1H), 7.23-7.26 (m, 2H), 7.35-7.37 (m, 2H);  $^{13}\text{C}$  NMR ( $\text{CDCl}_3$ , 125 MHz)  $\delta$  21.5, 45.5, 119.7, 122.5, 128.7, 139.4, 154.6; HRMS (ESI)  $m/z$  Calcd for  $[\text{C}_{13}\text{H}_{21}\text{N}_2\text{O}]^+$  221.1648; found 221.1648.

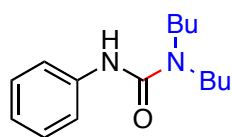

### 1,1-Dibutyl-3-phenylurea (**6h**)

To a stirred solution of dibutyl amine (84  $\mu$ L, 0.5 mmol) in Cyrene (0.5 mL, 1 M) at 0  $^{\circ}$ C was added phenyl isocyanate (**4a**, 55  $\mu$ L, 0.5 mmol). The resultant mixture was allowed to warm to r.t. over 1 h. Water (5 mL) was added and the mixture was stirred for 30 min. The solvent was removed by Buchner filtration and the filtrate was washed with water (60 mL). The residue was dissolved in EtOAc (20 mL), dried over anhydrous sodium sulfate and the solvent was removed under reduced pressure to give 1,1-dibutyl-3-phenylurea (**6h**, 112 mg, 90%) as a white solid. mp. ( $^{\circ}$ C) 81–82 [Lit.<sup>6</sup> 81-82]; IR (neat): 3292, 2957, 2928, 2870, 1633, 1596, 1501, 1444, 1317, 1241, 1221  $\text{cm}^{-1}$ ;  $^1\text{H}$  NMR ( $\text{CDCl}_3$ , 500 MHz)  $\delta$  0.93 (t,  $J$  = 7.4 Hz, 6H), 1.33 (sext,  $J$  = 7.3 Hz, 4H), 1.53-1.59 (m, 4H), 3.24-3.27 (m, 4H), 6.50 (br. s, 1H), 6.96-6.99 (m, 1H), 7.22-7.25 (m, 2H) 7.37-7.39 (m, 2H);  $^{13}\text{C}$  NMR ( $\text{CDCl}_3$ , 125 MHz)  $\delta$  13.9, 20.0, 30.6, 47.2, 60.3, 119.7, 122.5, 128.5, 139.3, 154.9; HRMS (ESI)  $m/z$  Calcd for  $[\text{C}_{15}\text{H}_{25}\text{N}_2\text{O}]^+$  249.1961; found 249.1962.

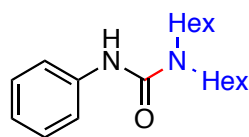

### 1,1-Dihexyl-3-phenylurea (**6i**)

To a stirred solution of dihexylamine (117  $\mu$ L, 0.50 mmol) in Cyrene (0.1 M) at 0  $^{\circ}$ C was added phenyl isocyanate (**4a**, 55  $\mu$ L, 0.50 mmol). The resultant mixture was stirred at rt for 1 h. Water (5 mL) was added and the precipitate was filtered and washed with water. The residue was dried over anhydrous sodium sulphate to give 1,1-dihexyl-3-phenylurea (**6i**, 136 mg, 89%), as a yellow solid. mp. ( $^{\circ}$ C) 62-63; IR (neat): 3310, 2925, 2855, 1626, 1530  $\text{cm}^{-1}$ ;  $^1\text{H}$  NMR ( $\text{CDCl}_3$ , 500 MHz)  $\delta$  0.87-0.96 (m, 6 H), 1.30 (bs, 12 H), 1.56-1.60 (m, 4H), 3.26 (t,  $J$  = 9.5 Hz, 4H), 6.43 (bs, 1H), 6.96-7.00 (m, 1H), 7.22-7.26 (m, 2H), 7.36-7.38 (m, 2H);  $^{13}\text{C}$  NMR ( $\text{CDCl}_3$ , 125 MHz)  $\delta$  14.0, 22.6, 26.6, 28.6, 31.6, 47.7, 119.8, 122.6, 128.7, 139.4, 154.9; HRMS (ESI)  $m/z$  Calcd for  $[\text{C}_{19}\text{H}_{33}\text{N}_2\text{O}]^+$  305.2587; found 305.2588.

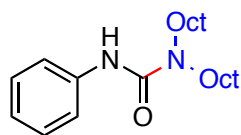

### 1,1-Dioctyl-3-phenylurea (**6j**)

To a stirred solution of dioctylamine (150  $\mu$ L, 0.50 mmol) in Cyrene (0.1 M) at 0  $^{\circ}$ C was added phenyl isocyanate (**4a**, 55  $\mu$ L, 0.50 mmol). The resultant mixture was stirred at rt for 1 h. Water (5 mL) was added and the precipitate was filtered and washed with water. The residue was dried over anhydrous sodium sulphate to give 1,1-dioctyl-3-phenylurea (**6j**, 108 mg, 56%), as a white solid. mp. ( $^{\circ}$ C) 242-244; IR (neat): 3322, 2923, 2853, 1636, 1595, 1498  $\text{cm}^{-1}$ ;  $^1\text{H}$  NMR ( $\text{CDCl}_3$ , 500 MHz)  $\delta$  0.86-0.89 (m, 6H), 1.26-1.31 (m, 20H), 1.58-1.61 (m, 4H), 3.26 (t,  $J = 7.6$  Hz, 4H), 6.33 (bs, 1H), 6.98-7.01 (m, 1H), 7.24-7.27 (m, 2H), 7.36-7.38 (m, 2H);  $^{13}\text{C}$  NMR ( $\text{CDCl}_3$ , 125 MHz)  $\delta$  14.0, 22.6, 27.0, 28.6, 29.2, 29.3, 31.7, 47.7, 119.7, 122.6, 128.7, 139.3, 154.8; HRMS (ESI)  $m/z$  Calcd for  $[\text{C}_{23}\text{H}_{41}\text{N}_2\text{O}]^+$  361.3213; found 361.3211.

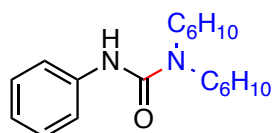

### 1,1-Dicyclohexyl-3-phenylurea (**6k**)

To a stirred solution of dicyclohexylamine (99  $\mu$ L, 0.50 mmol) in Cyrene (0.1 M) at 0  $^{\circ}$ C was added phenyl isocyanate (**4a**, 55  $\mu$ L, 0.50 mmol). The resultant mixture was stirred at rt for 1 h. Water (5 mL) was added and the precipitate was filtered and washed with water. The residue was dried over anhydrous sodium sulphate to give 1,1-dicyclohexyl-3-phenylurea (**6k**, 131 mg, 87%), as a white solid. mp. ( $^{\circ}$ C) 173-175 [Lit.<sup>7</sup> 167-168]; IR (neat): 3321, 2924, 2850, 1627  $\text{cm}^{-1}$ ;  $^1\text{H}$  NMR ( $\text{CDCl}_3$ , 500 MHz)  $\delta$  1.07-1.17 (m, 2H), 1.24-1.38 (m, 4H), 1.64-1.84 (m, 14H), 3.43-3.50 (m, 2H), 6.33 (bs, 1 H), 6.96-6.99 (m, 1H), 7.23-7.27 (m, 2H), 7.34-7.36 (m, 2H);  $^{13}\text{C}$  NMR ( $\text{CDCl}_3$ , 125 MHz)  $\delta$  25.5, 26.4, 31.9, 55.4, 119.6, 122.4, 128.7, 139.4, 154.9; HRMS (ESI)  $m/z$  Calcd for  $[\text{C}_{19}\text{H}_{29}\text{N}_2\text{O}]^+$  301.2274; found 301.2275.

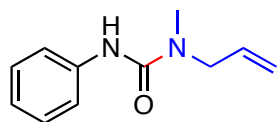

### 1-Allyl-1-methyl-3-phenylurea (**6l**)<sup>3</sup>

To a stirred solution of 1-allylmethylamine (48  $\mu$ L, 0.5 mmol) in Cyrene (0.5 mL, 1 M) at 0  $^{\circ}$ C was added phenyl isocyanate (**4a**, 55  $\mu$ L, 0.5 mmol). The resultant mixture was allowed to warm to r.t. over 1 h. Water (5 mL) was added and the mixture was stirred for 30 min. The solvent was removed by Buchner filtration and the filtrate was washed with water (60 mL). The residue was dissolved in EtOAc (20 mL), dried over anhydrous sodium sulfate and the solvent was removed under reduced pressure to give 1-allyl-1-methyl-3-phenylurea (**6l**, 68

mg, 71%), as a white solid. mp. (°C) 73-75 [Lit.<sup>8</sup> 73-76]; IR (neat): 3308, 1644, 1524, 1237, 1203, 991, 913, 747, 692 cm<sup>-1</sup>; <sup>1</sup>H NMR (CDCl<sub>3</sub>, 500 MHz) δ 3.01 (s, 3H), 3.97 (dt, *J* = 5.3 Hz, *J* = 1.6 Hz, 2H), 5.26 (t, *J* = 1.6 Hz, 1H), 5.27-5.29 (m, 1H), 5.83-5.91 (m, 1H), 6.38 (br. s, 1H) 7.00-7.03 (m, 1H), 7.25-7.29 (m, 2H), 7.34-7.36 (m, 2H); <sup>13</sup>C NMR (CDCl<sub>3</sub>, 125 MHz) δ 34.6, 51.6, 117.0, 120.0, 122.9, 128.8, 133.5, 139.2, 155.5; HRMS (ESI) *m/z* Calcd for [C<sub>11</sub>H<sub>14</sub>N<sub>2</sub>ONa]<sup>+</sup> 213.0998; found 213.0991.

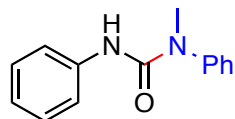

#### 1-Methyl-1,3-diphenylurea (**6m**)<sup>4</sup>

To a stirred solution of *N*-methylaniline (54 μL, 0.5 mmol) in Cyrene (0.5 mL, 1 M) at 0 °C was added phenyl isocyanate (**4a**, 55 μL, 0.5 mmol). The resultant mixture was allowed to warm to r.t. over 1 h. Water (5 mL) was added and the mixture was stirred for 30 min. The solvent was removed by Buchner filtration and the filtrate was washed with water (60 mL). The residue was dissolved in EtOAc (20 mL), dried over anhydrous sodium sulfate and the solvent was removed under reduced pressure to give 1-methyl-1,3-diphenylurea (**6m**, 112 mg, 99%), as a white solid. mp. (°C) 100–101 [Lit.<sup>5</sup> 97-99]; IR (neat): 3364, 3039, 1646, 1594, 1523, 1494, 1436 cm<sup>-1</sup>; <sup>1</sup>H NMR (CDCl<sub>3</sub>, 500 MHz) δ 3.34 (s, 3H), 6.26 (br. s, 1H), 6.97-7.00 (m, 1H), 7.21-7.24 (m, 2H), 7.27-7.29 (m, 2H), 7.32-7.34 (m, 2H), 7.36-7.39 (m, 2H), 7.46-7.50 (m, 2H); <sup>13</sup>C NMR (CDCl<sub>3</sub>, 125 MHz) δ 37.2, 119.2, 122.8, 127.4, 127.8, 128.7, 130.3, 138.8, 142.8, 154.3; HRMS (ESI) *m/z* Calcd for [C<sub>14</sub>H<sub>15</sub>N<sub>2</sub>O]<sup>+</sup> 227.1179; found 227.1179.

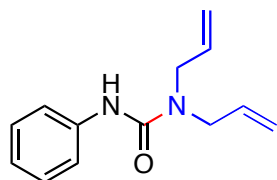

#### 1,1-Diallyl-3-phenylurea (**6n**)<sup>9</sup>

To a stirred solution of diallyl amine (62 μL, 0.5 mmol) in Cyrene (0.5 mL, 1 M) at 0 °C was added phenyl isocyanate (**4a**, 55 μL, 0.5 mmol). The resultant mixture was allowed to warm to r.t. over 1 h. Water (5 mL) was added and the mixture was stirred for 30 min. The solvent was removed by Buchner filtration and the filtrate was washed with water (60 mL). The residue was dissolved in EtOAc (20 mL), dried over anhydrous sodium sulfate and the solvent was removed under reduced pressure to give 1,1-diallyl-3-phenylurea (**6n**, 108 mg, 99%) as a clear oil. IR (neat): 3351, 2980, 1639, 1597, 1532, 1443 cm<sup>-1</sup>; <sup>1</sup>H NMR (CDCl<sub>3</sub>, 500 MHz) δ 3.95-3.97 (m, 4H), 5.25-5.31 (m, 4H), 5.85-5.92 (m, 2H), 6.51 (br. S, 1H), 6.99-7.02 (m, 1H), 7.24-7.28 (m, 2H), 7.31-7.34 (m, 2H); <sup>13</sup>C NMR (CDCl<sub>3</sub>, 125 MHz) δ 49.8, 117.3, 119.6, 122.9, 128.8, 134.1, 139.2, 155.5; HRMS (ESI): *m/z* Calcd for [C<sub>13</sub>H<sub>17</sub>N<sub>2</sub>O]<sup>+</sup> 217.1335; found 217.1344.

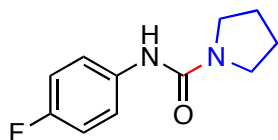

#### ***N*-(4-Fluorophenyl)pyrrolidine-1-carboxamide (6o)**

To a stirred solution of pyrrolidine (43  $\mu$ L, 0.5 mmol) in Cyrene (0.5 mL, 1 M) at 0 °C was added 4-fluorophenyl isocyanate (57  $\mu$ L, 0.5 mmol). The resultant mixture was allowed to warm to r.t. over 1 h. Water (5 mL) was added and the mixture was stirred for 30 min. The solvent was removed by Buchner filtration and the filtrate was washed with water (60 mL). The residue was dissolved in EtOAc (20 mL), dried over anhydrous sodium sulfate and the solvent was removed under reduced pressure to give *N*-(4-fluorophenyl)pyrrolidine-1-carboxamide (**6o**, 89 mg, 86%) as a white solid. mp. (°C) 137-138; IR (neat): 3278, 2966, 2871, 1631, 1506, 1414  $\text{cm}^{-1}$ ;  $^1\text{H}$  NMR ( $\text{CDCl}_3$ , 500 MHz)  $\delta$  1.96-1.99 (m, 4H), 3.44-3.47 (m, 4H), 6.09 (bs, 1H), 6.95-6.99 (m, 2H), 7.34-7.36 (m, 2H); HRMS (ESI)  $m/z$  Calcd for  $[\text{C}_{11}\text{H}_{13}\text{FN}_2\text{O}^+]$  231.0904; found 231.0902.

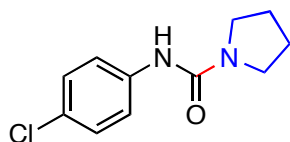

#### ***N*-(4-Chlorophenyl)pyrrolidine-1-carboxamide (6p)<sup>1</sup>**

To a stirred solution of 4-chlorophenyl isocyanate (76.7 mg, 0.5 mmol) in Cyrene (0.5 mL, 1 M) at 0 °C was added pyrrolidine (42  $\mu$ L, 0.5 mmol). The resultant mixture was allowed to warm to r.t. over 1 h. Water (5 mL) was added and the mixture was stirred for 30 min. The solvent was removed by Buchner filtration and the filtrate was washed with water (60 mL). The residue was dissolved in EtOAc (20 mL), dried over anhydrous sodium sulfate and the solvent was removed under reduced pressure to give *N*-(4-chlorophenyl)pyrrolidine-1-carboxamide (**6p**, 97 mg, 86%) as a white solid. mp. (°C) 165-167; IR (neat): 3292, 2957, 2928, 2870, 1633, 1596, 1501, 1444, 1317, 1241, 1221  $\text{cm}^{-1}$ ;  $^1\text{H}$  NMR ( $\text{CDCl}_3$ , 500 MHz) 1.96-1.98 (m, 4H), 3.44-3.46 (m, 4H), 6.18 (br. s, 1H), 7.21-7.24 (m, 2H), 7.35-7.38 (m, 2H);  $^{13}\text{C}$  NMR ( $\text{CDCl}_3$ , 125 MHz)  $\delta$  25.6, 45.8, 120.7, 127.6, 128.8, 137.8, 153.7; HRMS (ESI)  $m/z$  Calcd for  $[\text{C}_{11}\text{H}_{14}\text{ClN}_2\text{O}^+]$  225.0789; found 225.0788.

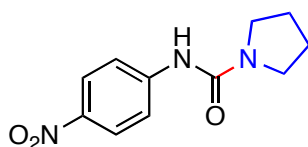

#### ***N*-(4-Nitrophenyl)pyrrolidine-1-carboxamide (6q)**

To a stirred solution of 4-nitrophenyl isocyanate (82 mg, 0.5 mmol) in Cyrene (0.5 mL, 1 M) at 0 °C was added pyrrolidine (42  $\mu$ L, 0.5 mmol). The resultant mixture was allowed to warm to r.t. over 1 h. Water (5 mL) was added and the mixture was stirred for 30 min. The solvent was removed by Buchner filtration and the filtrate was washed with water (60 mL). The



residue was dissolved in EtOAc (20 mL), dried over anhydrous sodium sulfate and the solvent was removed under reduced pressure to give *N*-(4-nitrophenyl)pyrrolidine-1-carboxamide (**6q**, 83 mg, 70%) as a yellow solid. mp. (°C) 185-187 [Lit.<sup>10</sup> 185-186]; IR (neat): 3366, 3338, 2927, 2881, 17.32, 1657, 1596, cm<sup>-1</sup>; <sup>1</sup>H NMR (CDCl<sub>3</sub>, 500MHz) δ 1.99-2.20 (m, 4H), 3.48-3.51 (m, 4H), 6.51 (bs, 1H), 7.58-7.60 (m, 2H), 8.16-8.18 (m, 2H); <sup>13</sup>C NMR (CDCl<sub>3</sub>, 125 MHz) δ 25.6, 46.0, 118.0, 125.2, 142.4, 145.4, 152.6; HRMS (ESI) *m/z* Calcd for [C<sub>11</sub>H<sub>14</sub>N<sub>3</sub>O<sub>3</sub>]<sup>+</sup> 236.1030; found 236.1031.

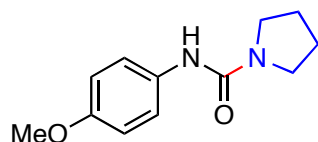

### ***N*-(4-Methoxyphenyl)pyrrolidine-1-carboxamide (**6r**)<sup>1</sup>**

To a stirred solution of pyrrolidine (42 μL, 0.5 mmol) in Cyrene (0.5 mL, 1 M) at 0 °C was added 4-methoxyphenyl isocyanate (65 μL, 0.5 mmol). The resultant mixture was allowed to warm to r.t. over 1 h. Water (5 mL) was added and the mixture was stirred for 30 min. The solvent was removed by Buchner filtration and the filtrate was washed with water (60 mL). The residue was dissolved in EtOAc (20 mL), dried over anhydrous sodium sulfate and the solvent was removed under reduced pressure to give *N*-(4-methoxyphenyl)pyrrolidine-1-carboxamide (**6r**, 56 mg, 51%) as a white solid. mp. (°C) 111-112 [Lit.<sup>1</sup> 111-113]; IR (neat): 3329, 2965, 1639, 1597, 1509, 1411 cm<sup>-1</sup>; <sup>1</sup>H NMR (CDCl<sub>3</sub>, 500MHz) δ 1.92-1.95 (m, 4H), 3.41-3.43 (m, 4H), 3.76 (s, 3H), 6.13 (bs, 1H), 6.80-6.83 (m, 2H), 7.28-7.31 (m, 2H); <sup>13</sup>C NMR (CDCl<sub>3</sub>, 125 MHz) δ 25.5, 45.7, 55.4, 113.9, 121.8, 132.2, 154.4, 155.5; HRMS (ESI) *m/z* Calcd for [C<sub>12</sub>H<sub>17</sub>N<sub>2</sub>O<sub>2</sub>]<sup>+</sup> 221.1285; found 221.1287.

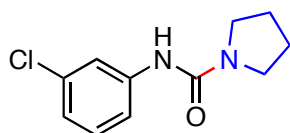

### ***N*-(3-Chlorophenyl)pyrrolidine-1-carboxamide (**6s**)**

To a stirred solution of pyrrolidine (43 μL, 0.5 mmol) in Cyrene (0.5 mL, 1 M) at 0 °C was added 3-chlorophenyl isocyanate (65 μL, 0.5 mmol). The resultant mixture was allowed to warm to r.t. over 1 h. Water (5 mL) was added and the mixture was stirred for 30 min. The solvent was removed by Buchner filtration and the filtrate was washed with water (60 mL). The residue was dissolved in EtOAc (20 mL), dried over anhydrous sodium sulfate and the solvent was removed under reduced pressure to give *N*-(3-chlorophenyl)pyrrolidine-1-carboxamide (**6s**, 103 mg, 92%) as a white solid. mp. (°C) 138-140; IR (neat): 3305, 3275, 2980, 2878, 1651, 1586 cm<sup>-1</sup>; <sup>1</sup>H NMR (CDCl<sub>3</sub>, 500 MHz) δ 1.95-1.98 (m, 4H), 3.43-3.46 (m, 4H), 6.22 (bs, 1H), 6.96-6.98 (m, 1H), 7.16-7.19 (m, 1H), 7.25-7.27 (m, 1H), 7.52-7.53 (m, 1H); <sup>13</sup>C NMR (CDCl<sub>3</sub>, 125 MHz) δ 25.5, 45.8, 117.2, 119.3, 122.6, 129.7, 134.4, 140.4, 153.4; HRMS (ESI) *m/z* Calcd for [C<sub>11</sub>H<sub>13</sub>ClN<sub>2</sub>O<sub>2</sub>Na]<sup>+</sup> 247.0609; found 247.0616.

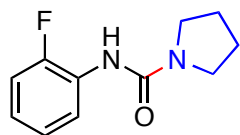

### ***N*-(2-Fluorophenyl)pyrrolidine-1-carboxamide (6t)**

To a stirred solution of pyrrolidine (43  $\mu$ L, 0.5 mmol) in Cyrene (0.5 mL, 1 M) at 0  $^{\circ}$ C was added 2-fluorophenyl isocyanate (56  $\mu$ L, 0.5 mmol). The resultant mixture was allowed to warm to r.t. over 1 h. Water (5 mL) was added and the mixture was stirred for 30 min. The solvent was removed by Buchner filtration and the filtrate was washed with water (60 mL). The residue was dissolved in EtOAc (20 mL), dried over anhydrous sodium sulfate and the solvent was removed under reduced pressure to give *N*-(2-fluorophenyl)pyrrolidine-1-carboxamide (**6t**, 43 mg, 41%) as a pale yellow solid. mp. ( $^{\circ}$ C) 61-62; IR (neat): 3269, 2965, 2870, 1645  $\text{cm}^{-1}$ ;  $^1\text{H}$  NMR ( $\text{CDCl}_3$ , 500 MHz)  $\delta$  1.95-1.98 (m, 4H), 3.46-3.48 (m, 4H), 6.41 (bs, 1H), 6.89-6.94 (m, 1H), 7.00-7.09 (m, 2H), 8.18-8.28 (m, 1H);  $^{13}\text{C}$  NMR ( $\text{CDCl}_3$ , 125 MHz)  $\delta$  25.5, 45.7, 114.4, 120.9, 122.2, 124.4, 127.8, 151.2, 153.3; HRMS (ESI)  $m/z$  Calcd for  $[\text{C}_{11}\text{H}_{13}\text{FN}_2\text{ONa}]^+$  231.0904; found 231.0903.

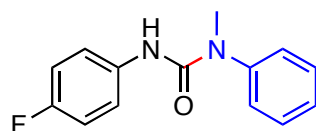

### **3-(4-Fluorophenyl)-1-methyl-1-phenylurea (6u)<sup>11</sup>**

To a stirred solution of 1-methylaniline (54  $\mu$ L, 0.5 mmol) in Cyrene (0.5 mL, 1 M) at 0  $^{\circ}$ C was added 4-fluorophenyl isocyanate (57  $\mu$ L, 0.5 mmol). The resultant mixture was allowed to warm to r.t. over 1 h. Water (5 mL) was added and the mixture was stirred for 30 min. The solvent was removed by Buchner filtration and the filtrate was washed with water (60 mL). The residue was dissolved in EtOAc (20 mL), dried over anhydrous sodium sulfate and the solvent was removed under reduced pressure to give 3-(4-fluorophenyl)-1-methyl-1-phenylurea (**6u**, 79 mg, 65%) as a white solid. mp. ( $^{\circ}$ C) 109-110; IR (neat): 3352, 3045, 1644, 1595, 1525, 1491, 1442, 848  $\text{cm}^{-1}$ ;  $^1\text{H}$  NMR ( $\text{CDCl}_3$ , 500 MHz)  $\delta$  3.34 (s, 3H), 6.18 (br. s, 1H), 6.90-6.95 (m, 2H), 7.21-7.25 (m, 2H), 7.33-7.35 (m, 2H), 7.47-7.51 (m, 2H);  $^{13}\text{C}$  NMR ( $\text{CDCl}_3$ , 125 MHz)  $\delta$  37.2, 115.2, 121.1, 127.4, 130.3, 134.7, 142.7, 154.4, 159.6; HRMS (ESI)  $m/z$  Calcd for  $[\text{C}_{14}\text{H}_{13}\text{FN}_2\text{ONa}]^+$  267.0904; found 267.0904.

### III. Molar Efficiency Calculations

Molar efficiency calculations were calculated using the method of Watson *et al.*<sup>12</sup> in which:  
 molar efficiency (Mol. E%) = [moles product / moles starting material + additives + catalysts + solvents] x 100

The Mol. E% was calculated for each step of the process and the total molar efficiency (molE<sub>total</sub>) is the multiplication of these values.

#### Molar Efficiency Calculations

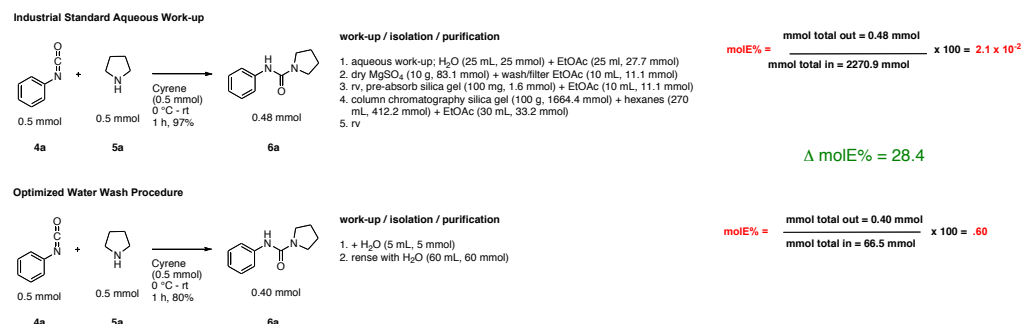

Thus, the approach presented in this report amounts to a 28-fold increase in molar efficiency vs. an industrial standard method of urea isolation and purification.

### IV. References

- <sup>1</sup> Y. Wei, J. Liu, S. Lin, H. Ding, F. Liang and B. Zhao, *Org. Lett.*, 2010, **12**, 4220-4223.
- <sup>2</sup> B. Gabriele, G. Salerno, R. Mancuse and M. Costa, *J. Org. Chem.*, 2004, **69**, 4741-4750.
- <sup>3</sup> S. Peterson, S. Stucka and C. Dinsmore, *Org. Lett.*, 2010, **12**, 1340-1343.
- <sup>4</sup> X. D. Liu, M. Kimura, A. Sudo and T. Endo, *J. Poly. Sci. A: Poly. Chem.*, 2010, **23**, 5298-5305.
- <sup>5</sup> S.-H. Lee, H. Matsushita, B. Clapham and K. D. Janda, *Tetrahedron*, 2004, **60**, 3439-3443.
- <sup>6</sup> M. Fuchter, C. Smith, M. Tsang, A. Boyer, S. Saubern, J. Ryan and A. Holmes, *Chem. Comm.*, 2008, 2152-2154.
- <sup>7</sup> D. G. Crosby and C. Niemann, *J. Am. Chem. Soc.*, 1953, **75**, 3425-3428.
- <sup>8</sup> J. Fritz, J. Nakhla and J. Wolfe, *Org. Lett.*, 2006, **8**, 2531-2534.
- <sup>9</sup> Zhang, Y. Luo, Y. Wang and L. Zhang, *Angew. Chem. Int. Ed.*, 2011, **50**, 4450-4454.
- <sup>10</sup> G. Boyd and R. Monteil, *J. Chem. Soc., Perkin Trans. 1*, 1980, 846-848.
- <sup>11</sup> K. J. Padiya, S. Gavade, B. Kardile, M. Tiwari, S. Bajare, M. Mane, V. Gaware, S. Varghese, D. Harel and S. Kurhade. *Org. Lett.* 2012, **14**, 2814-2817.
- <sup>12</sup> McGonagle, F. I.; Sneddon, H. F.; Jamieson, C.; Watson, A. J. B. *ACS Sustainable Chem. Eng.* **2014**, **2**, 523-532.

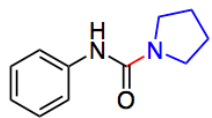

**6a**

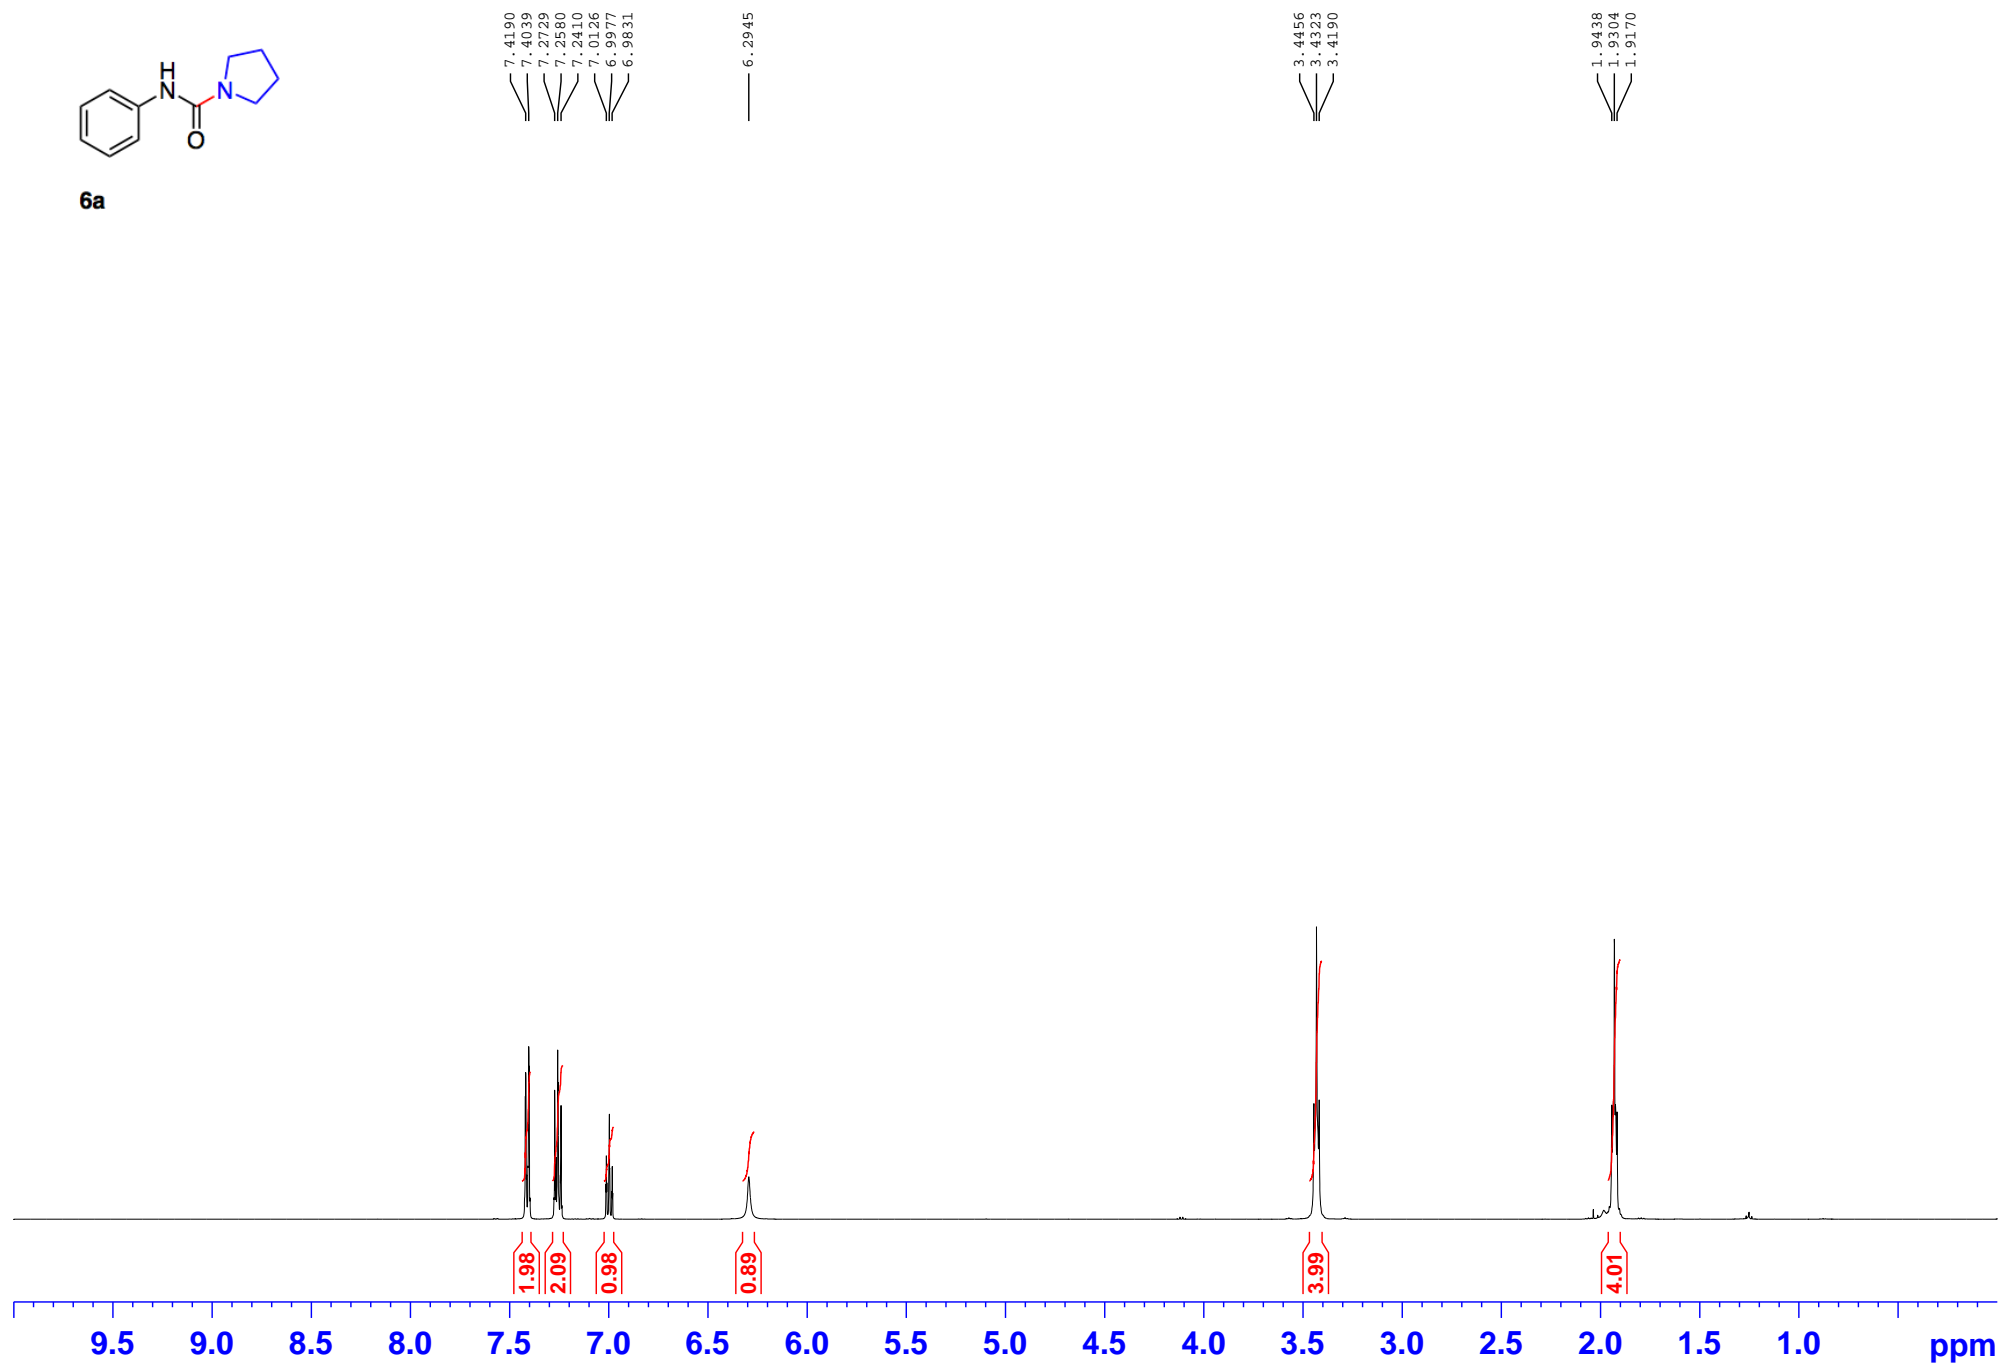

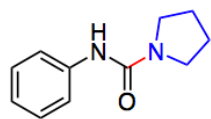

**6a**

153.9290

139.2115

128.7021

122.5816

119.4849

45.7020

25.4996

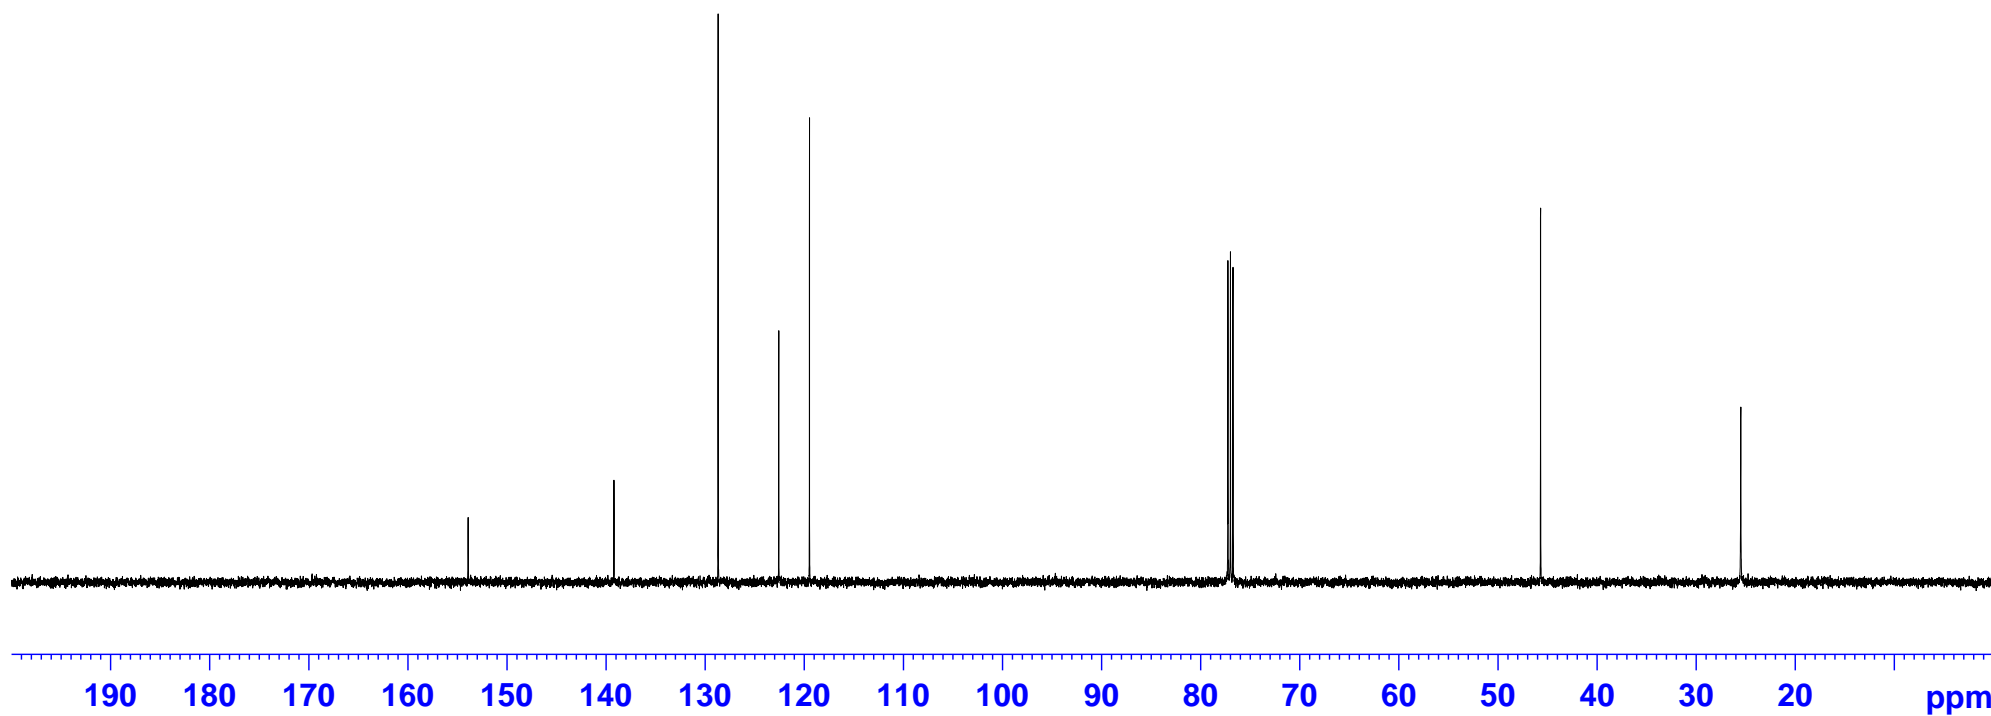

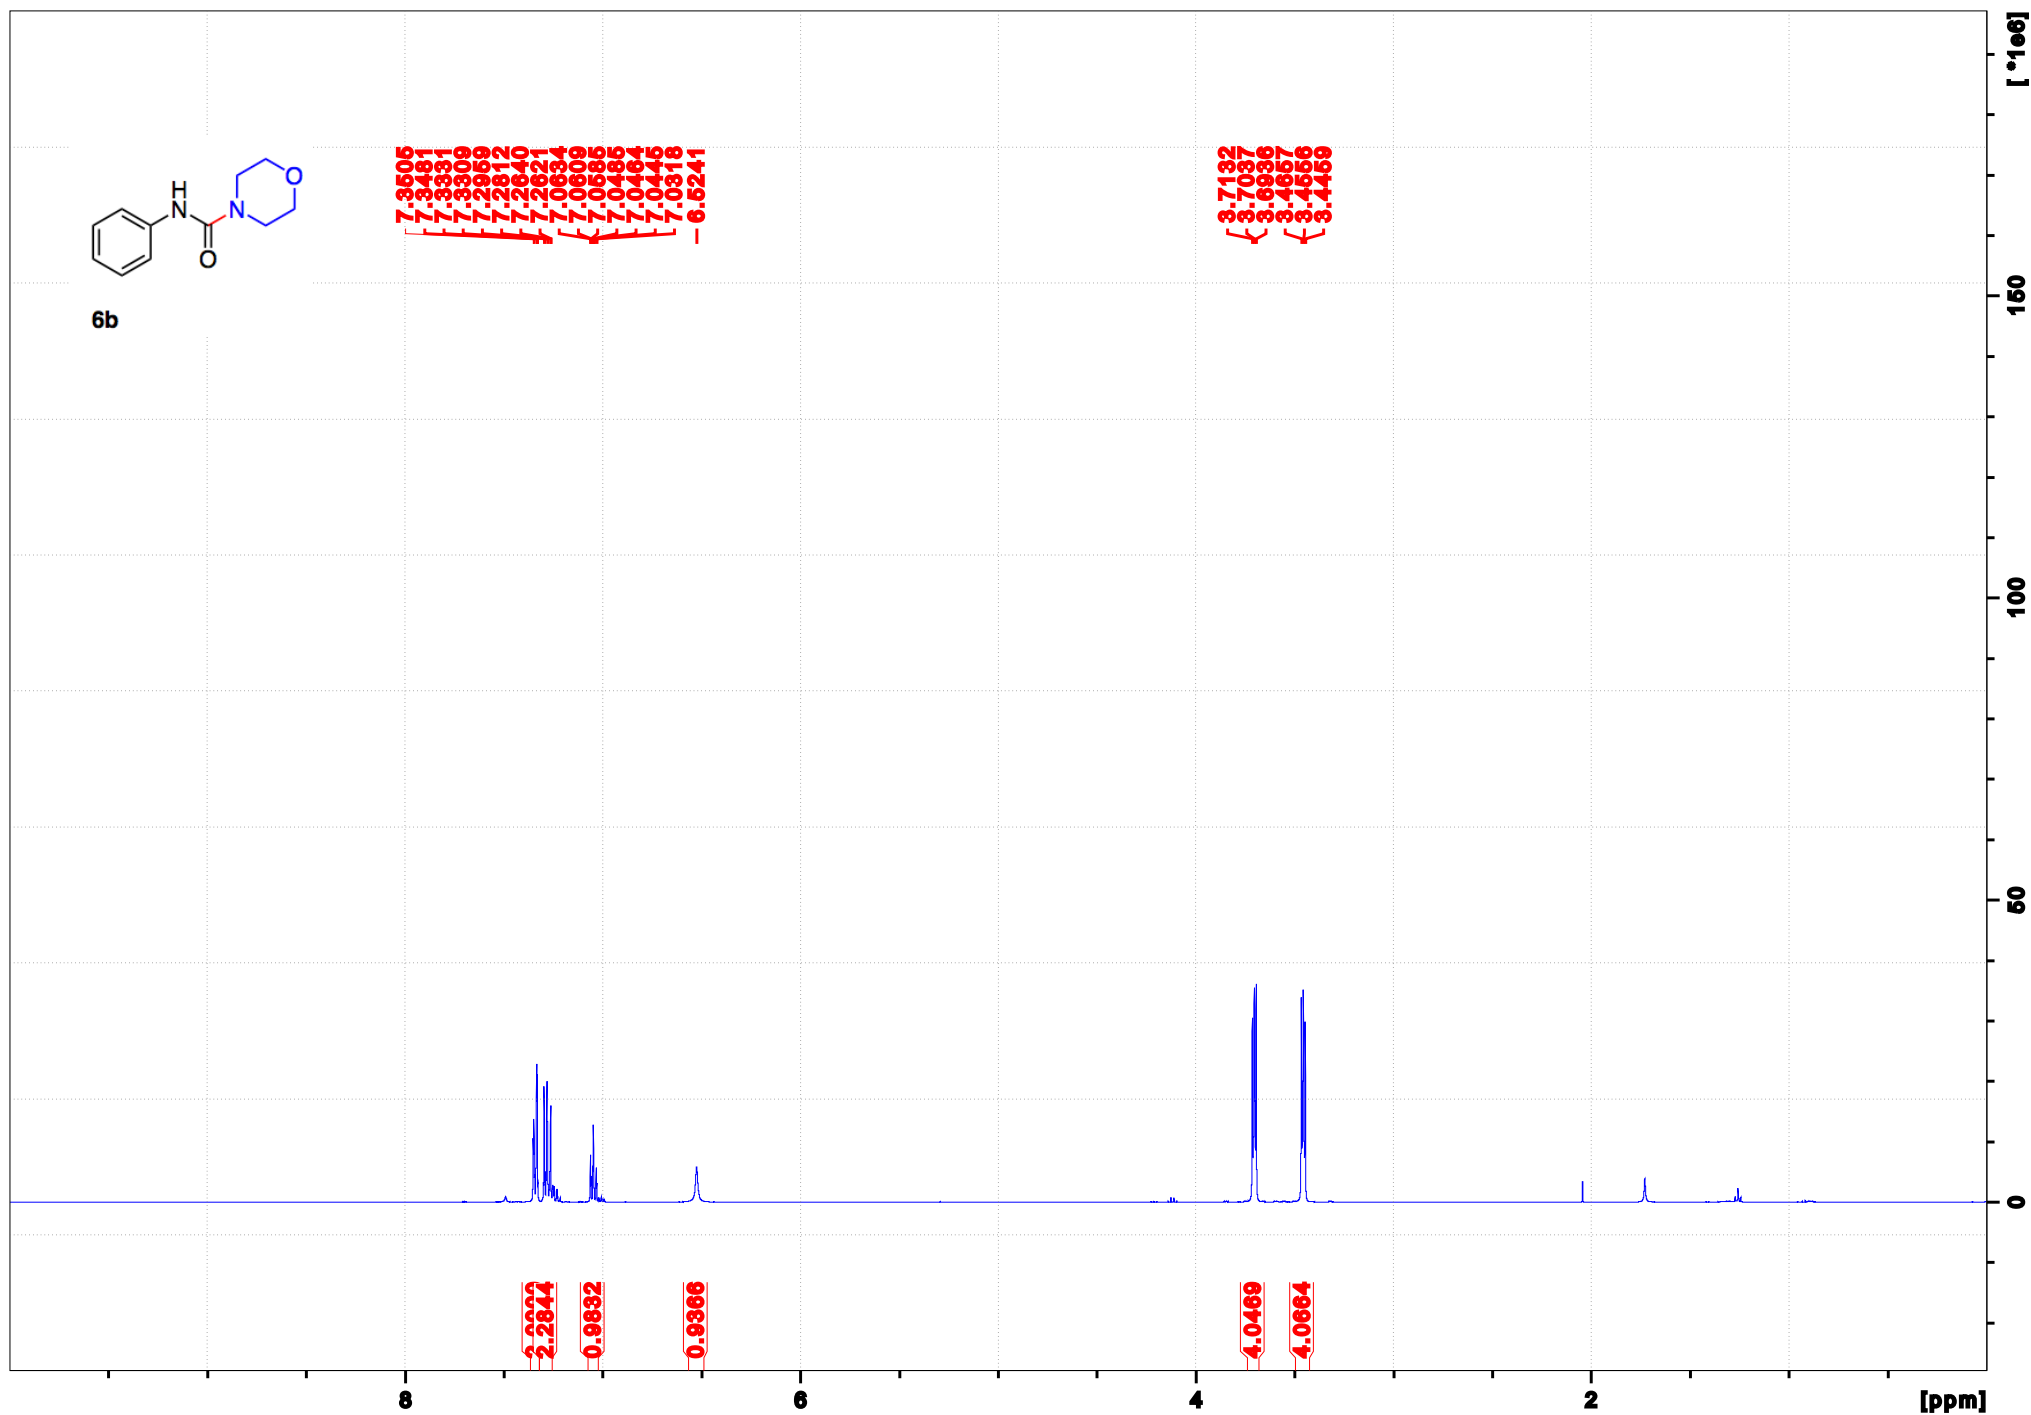

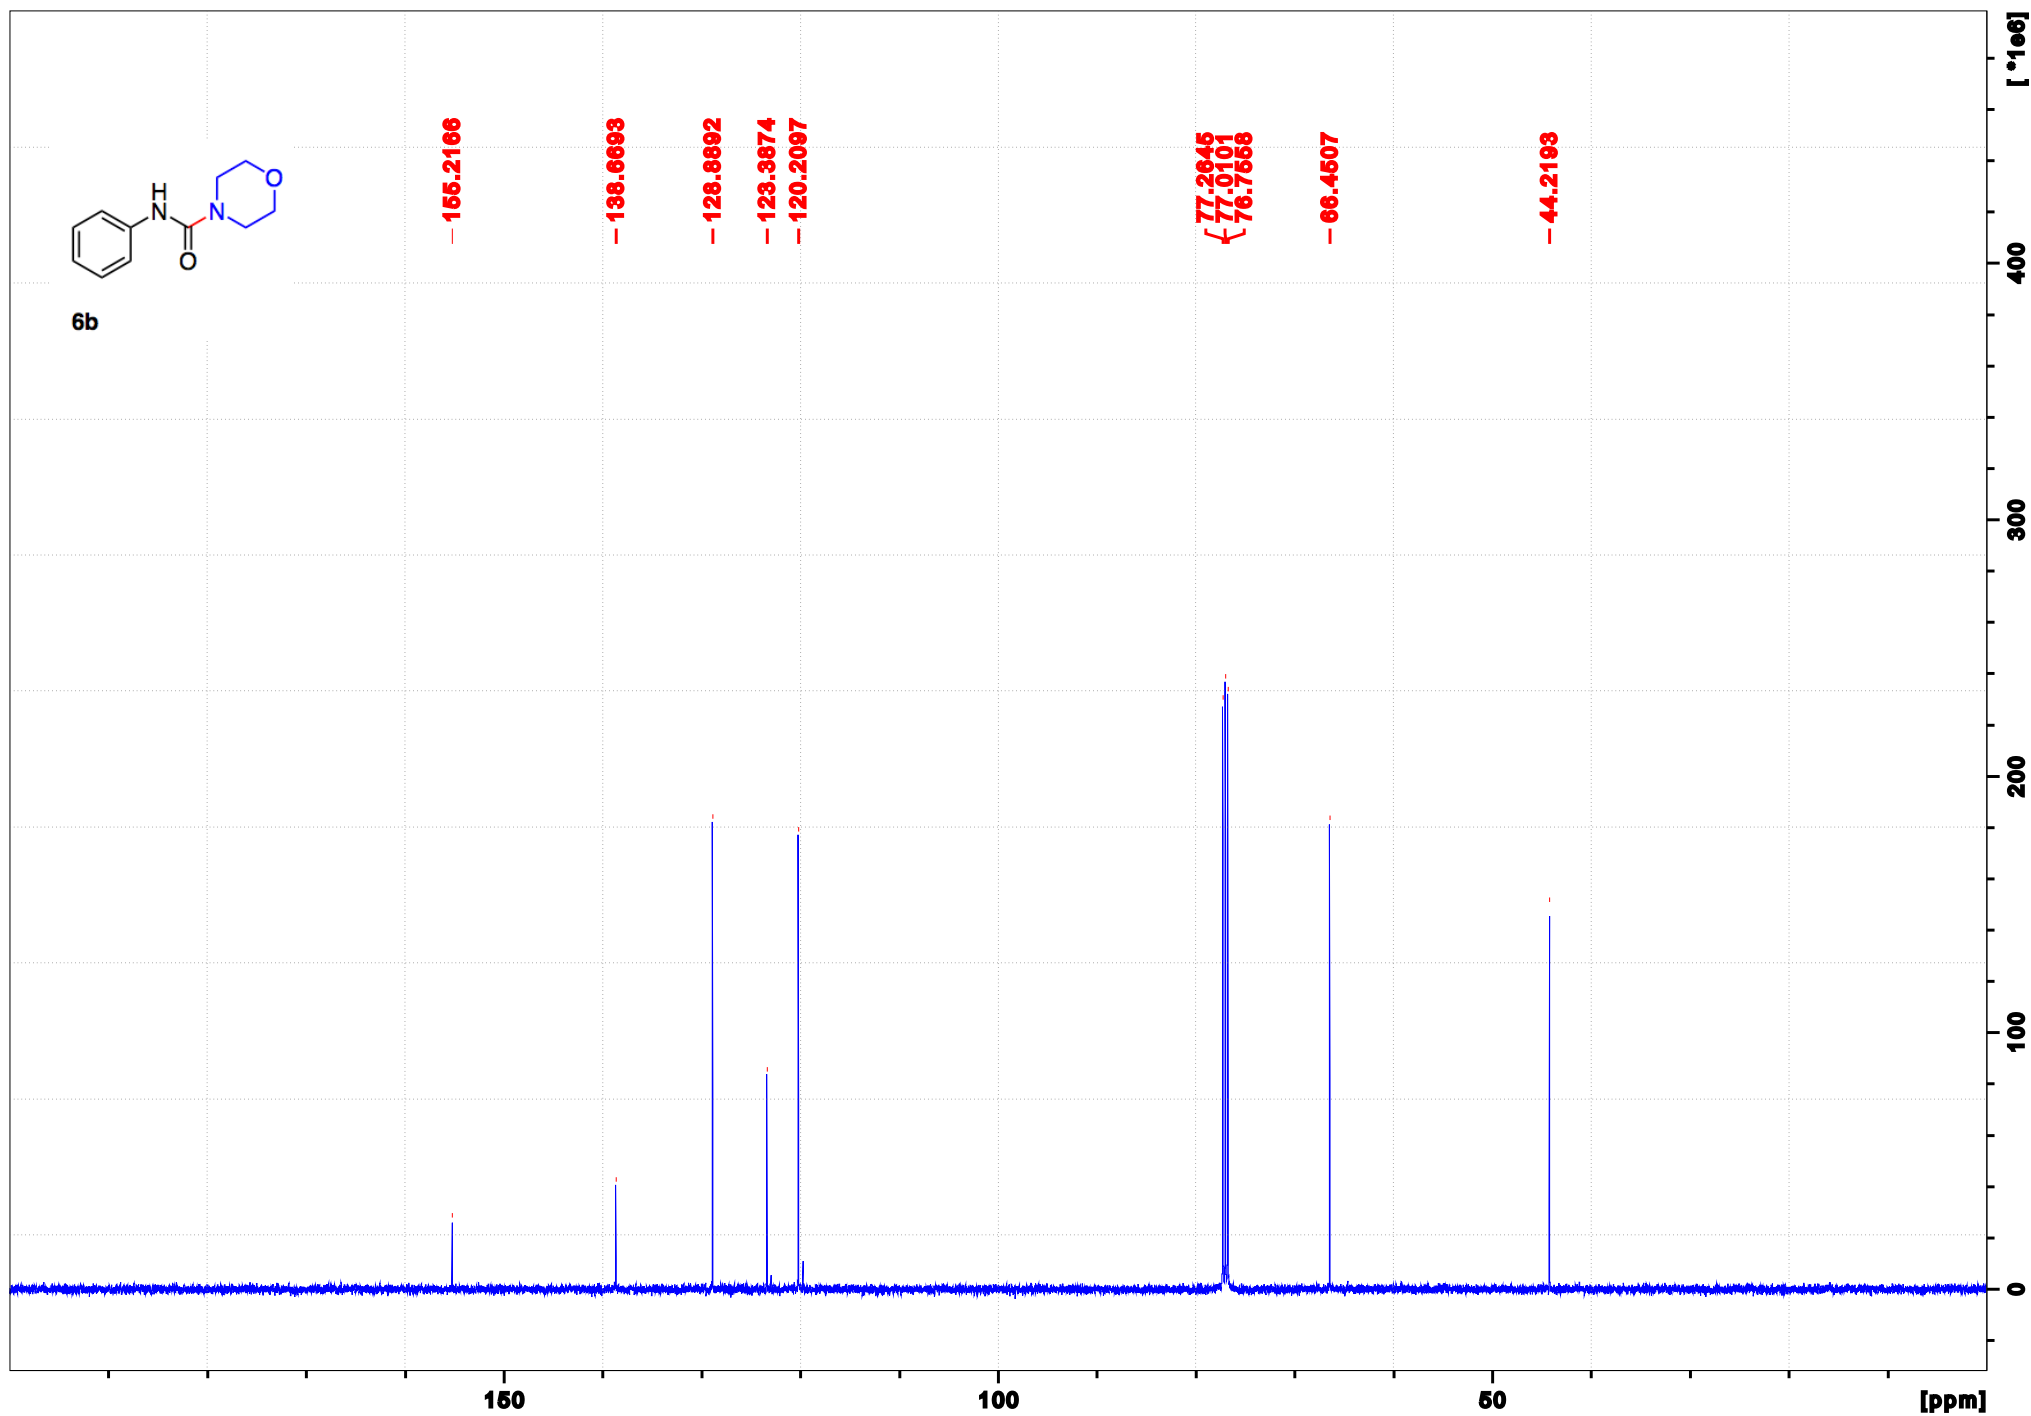

S15

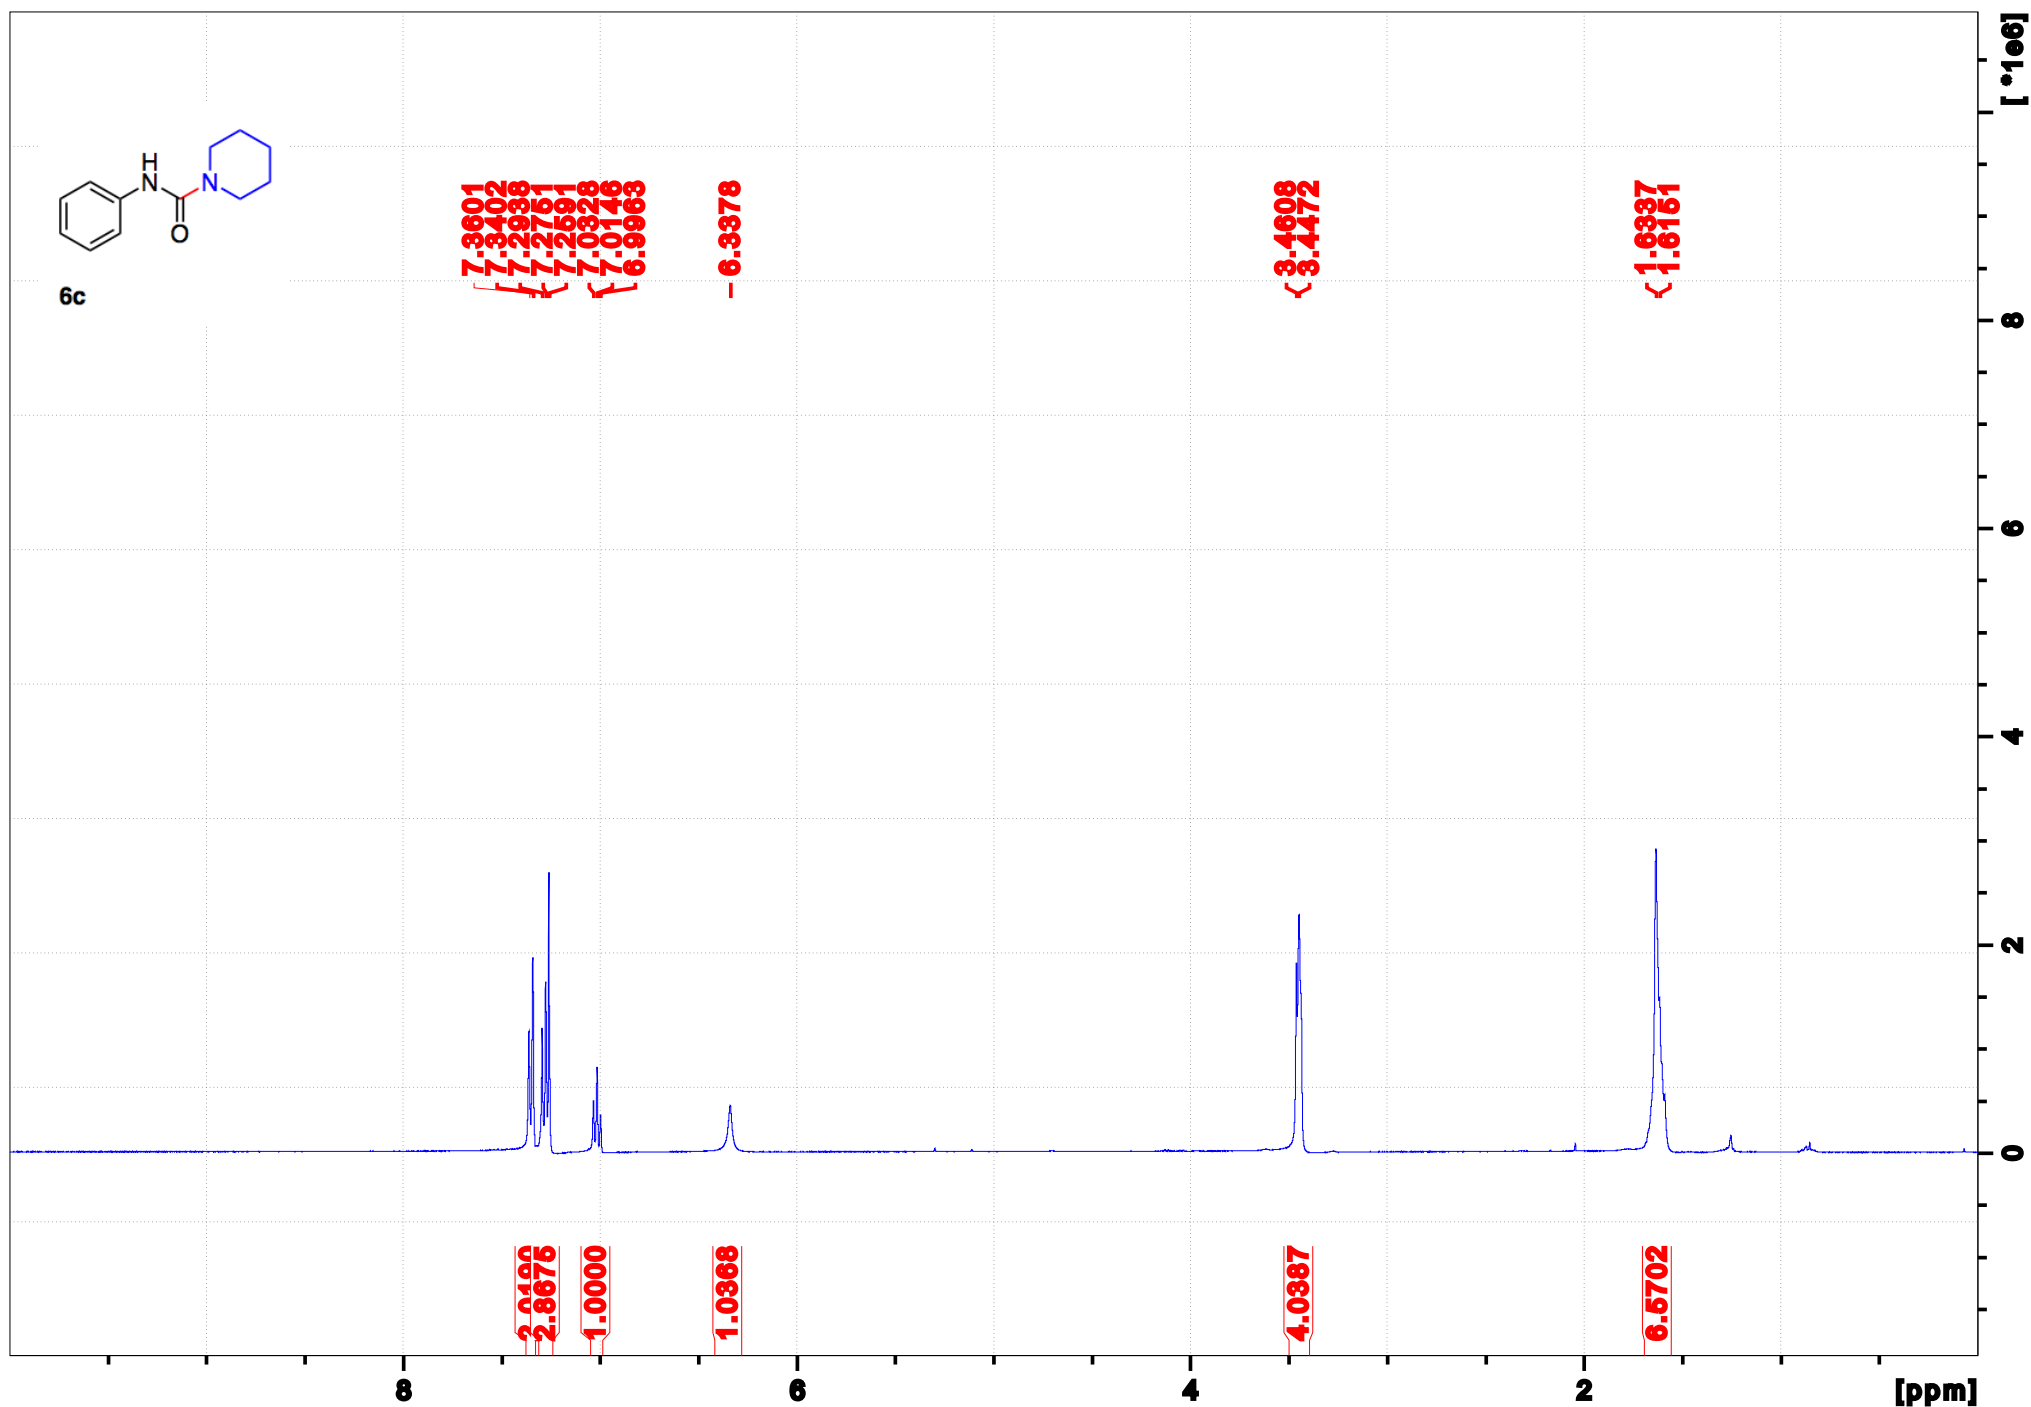



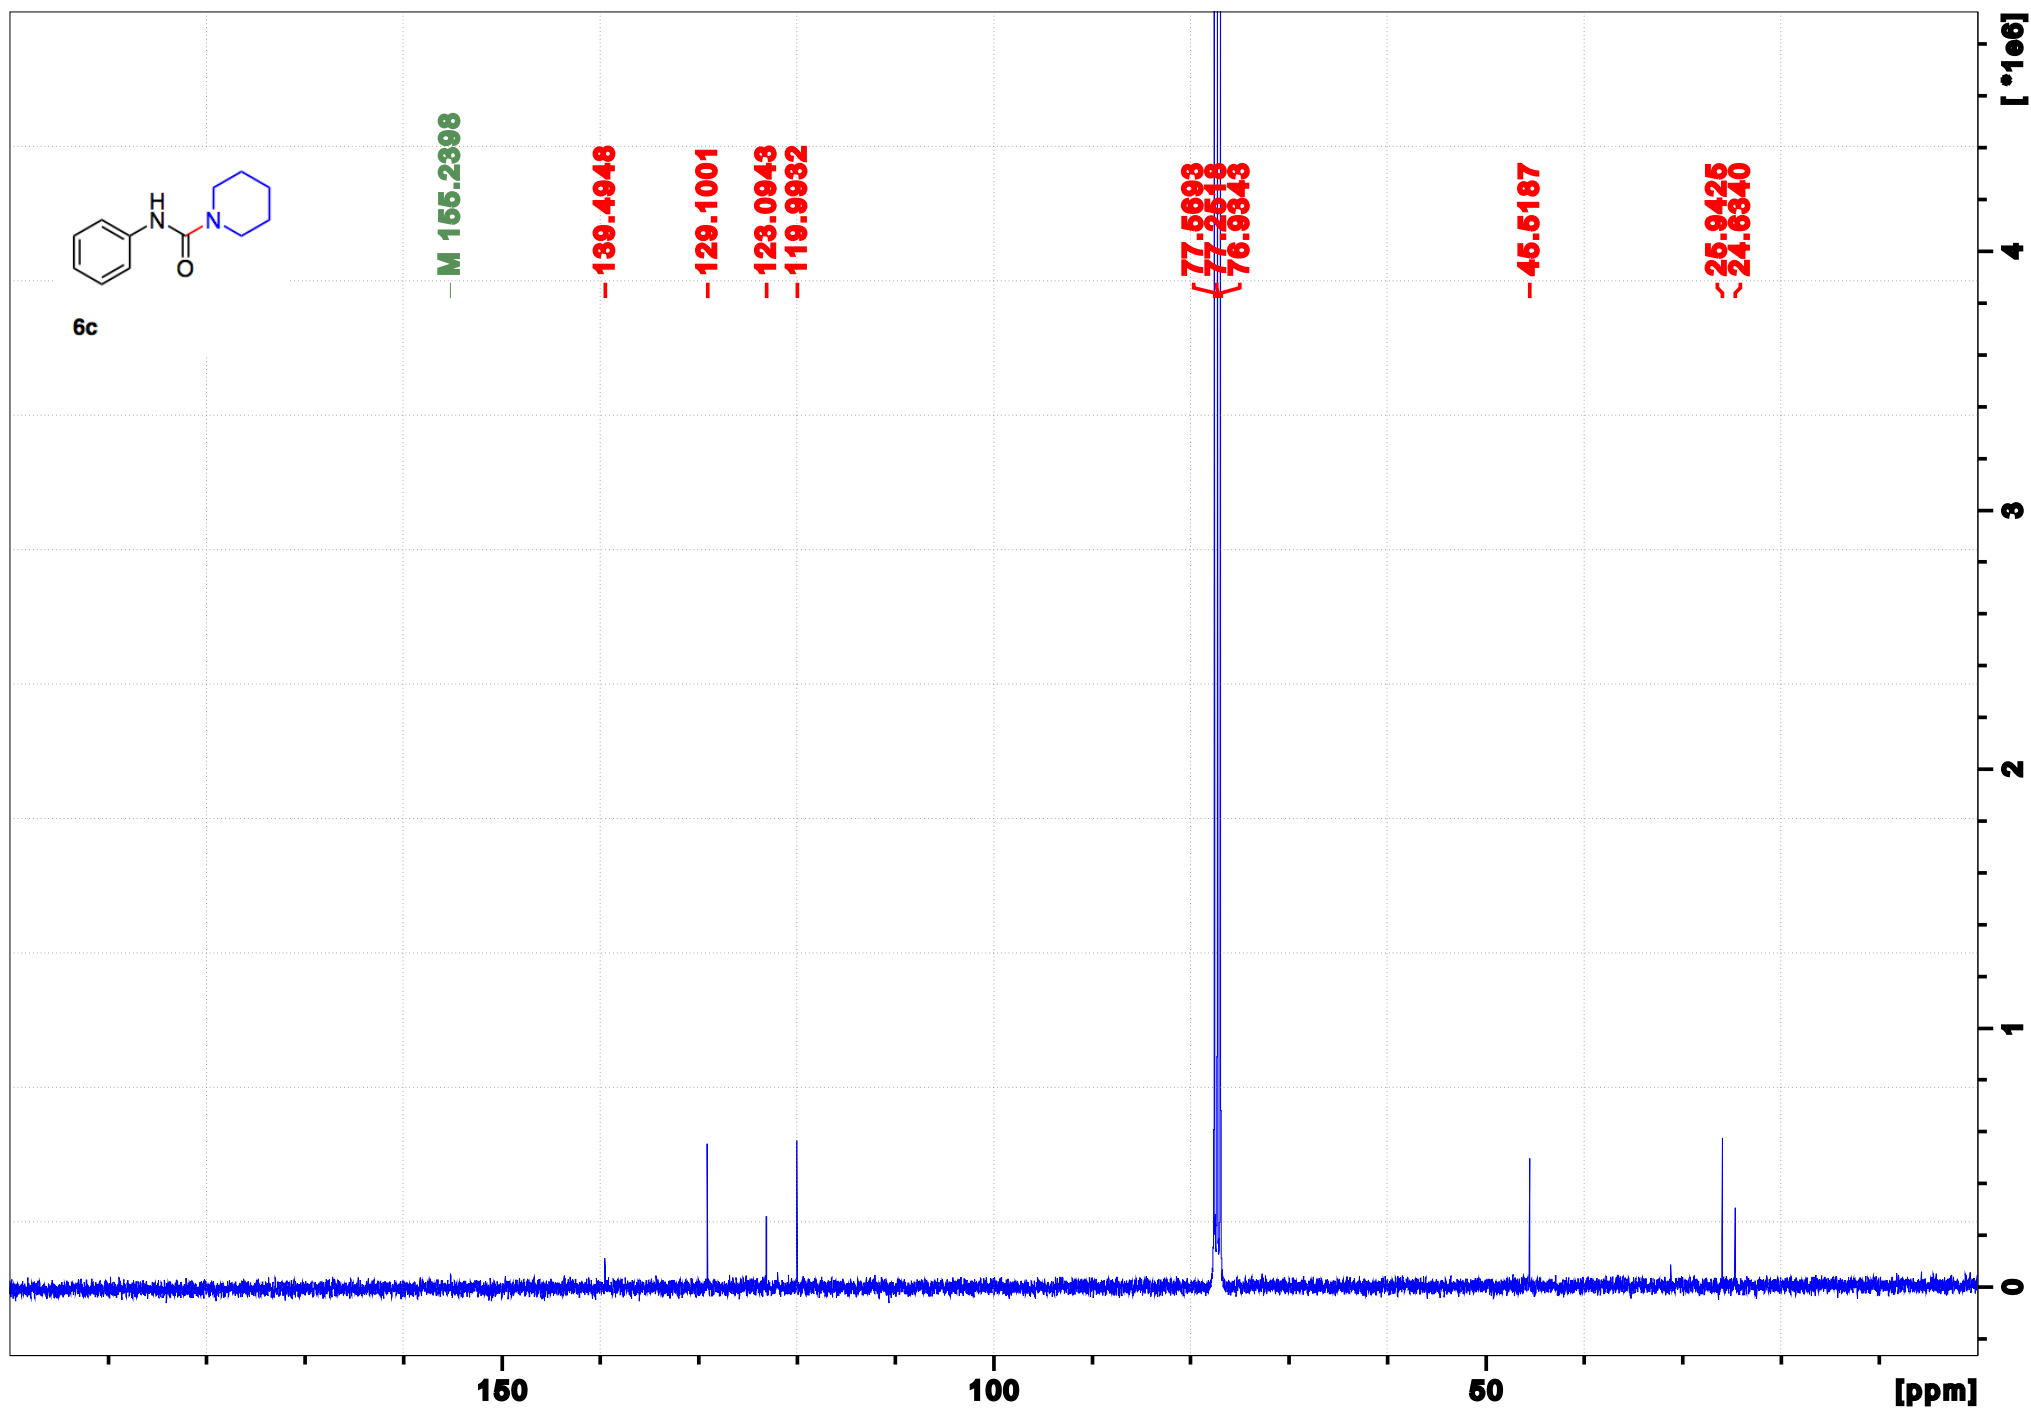

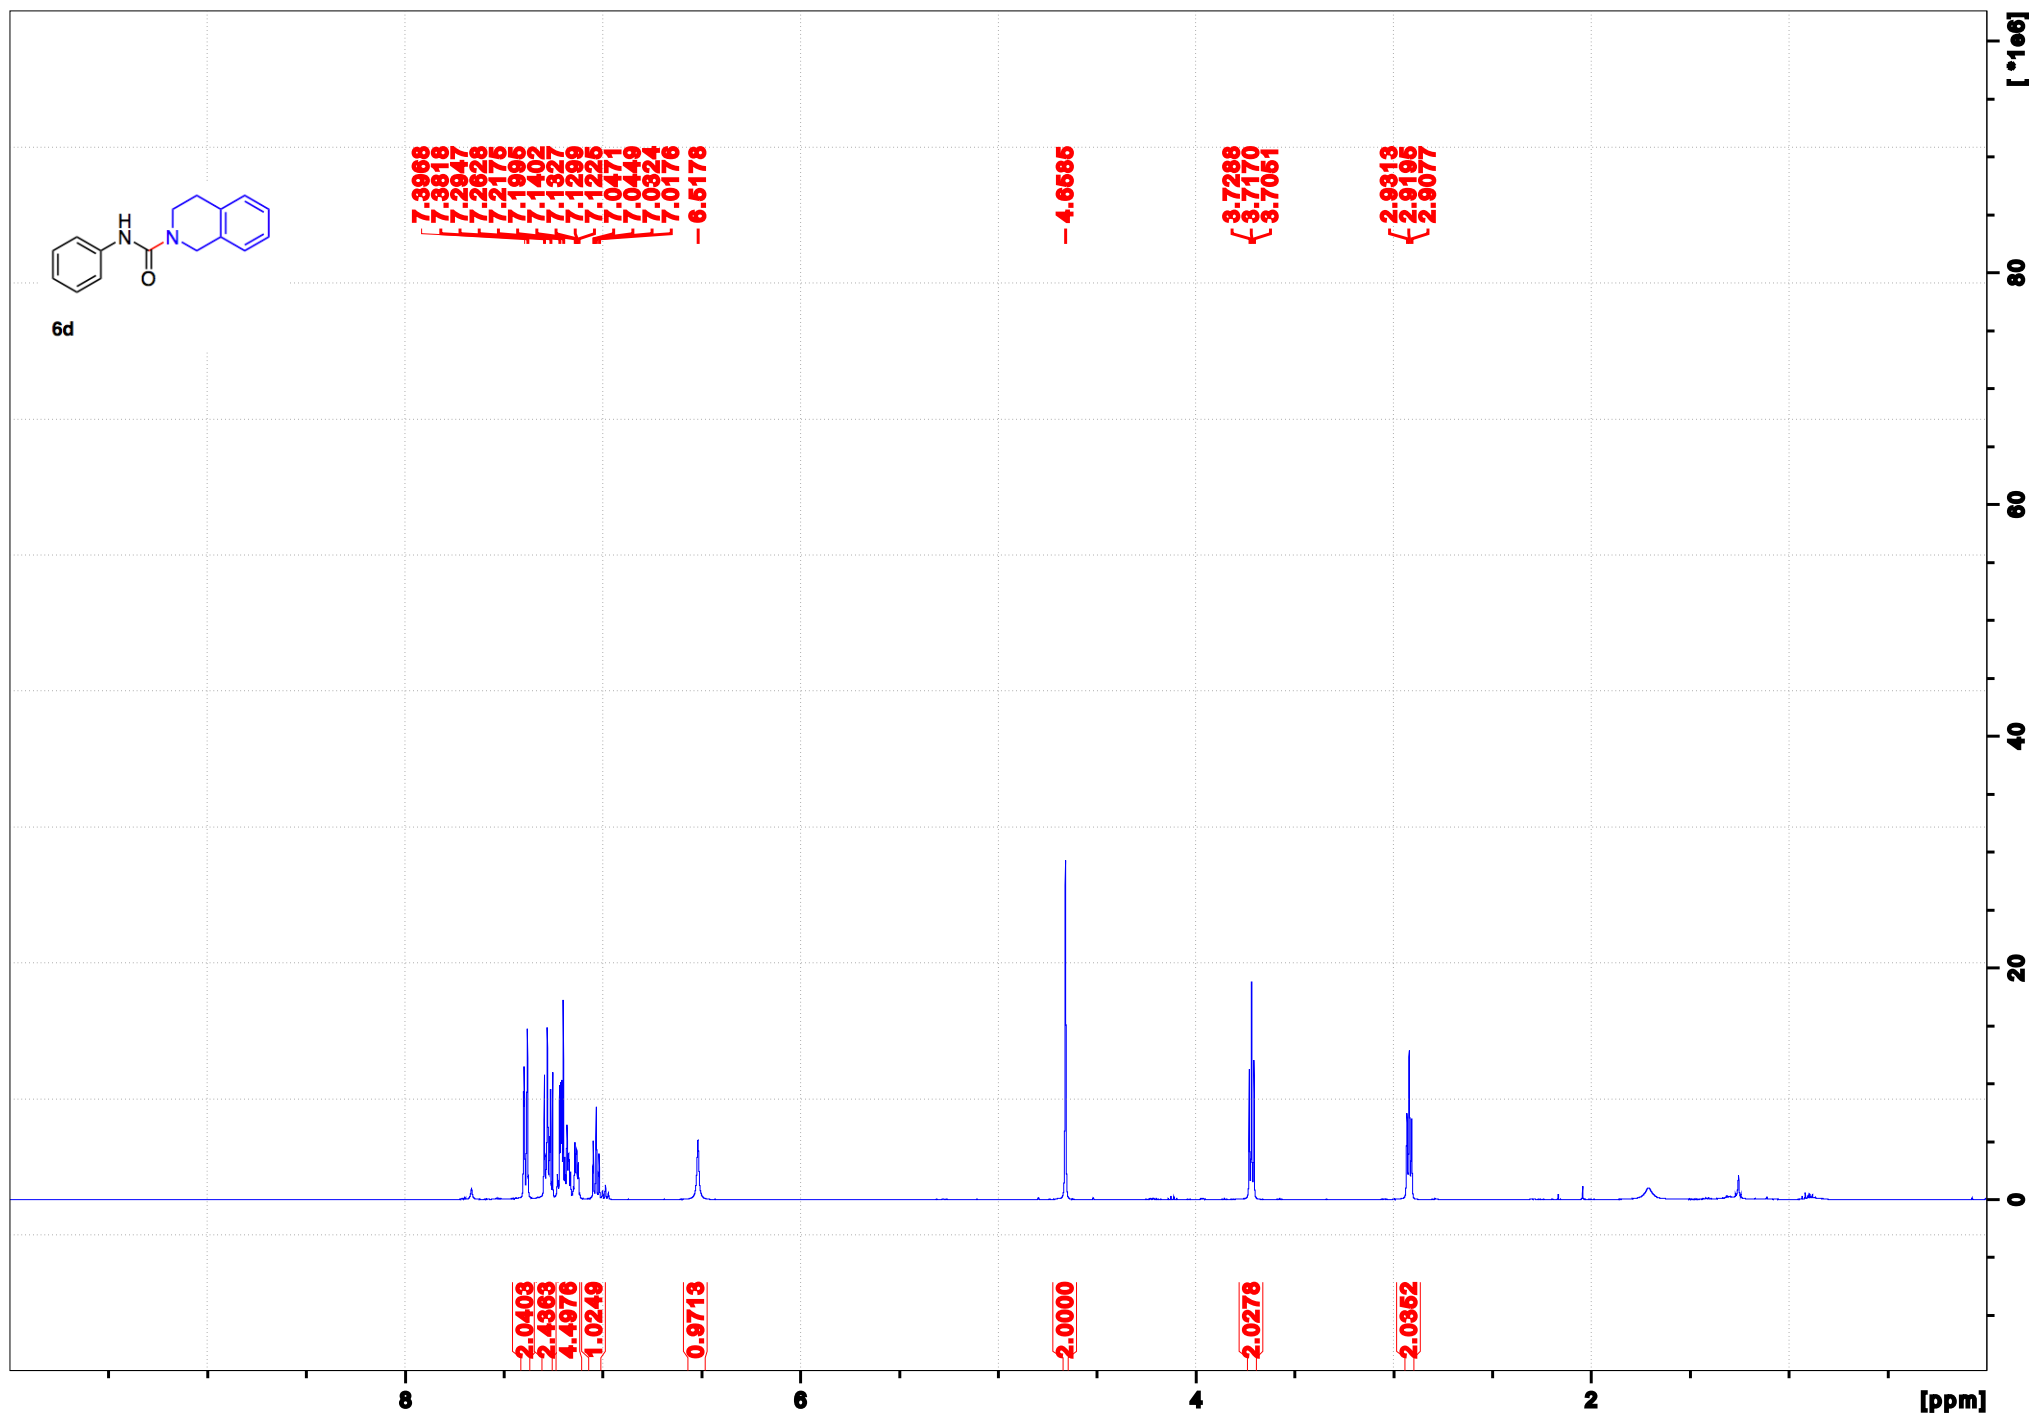

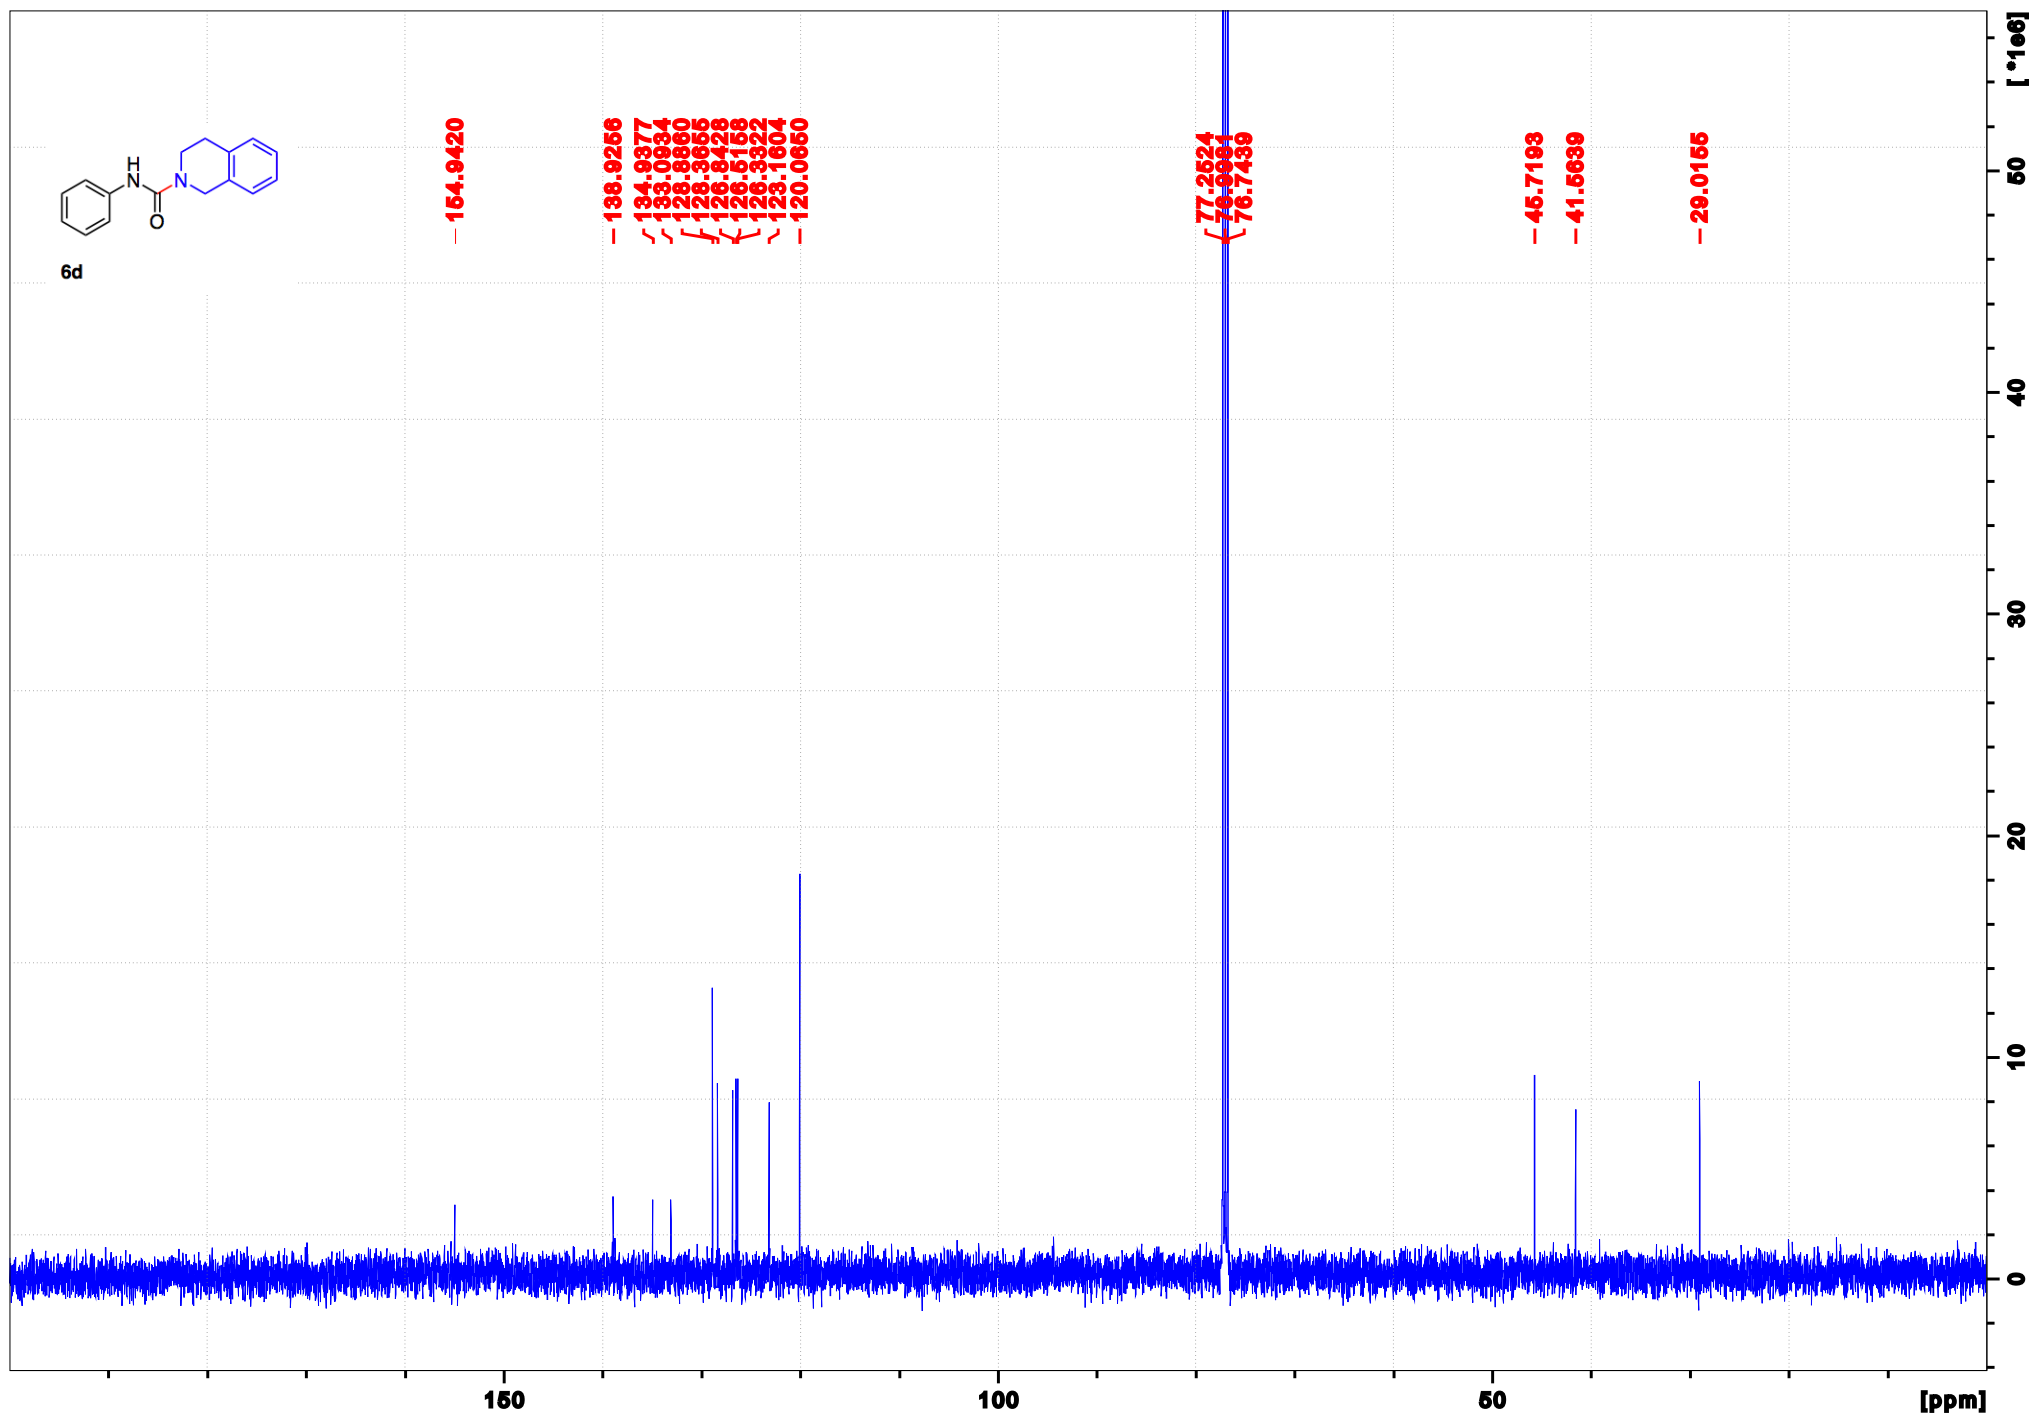

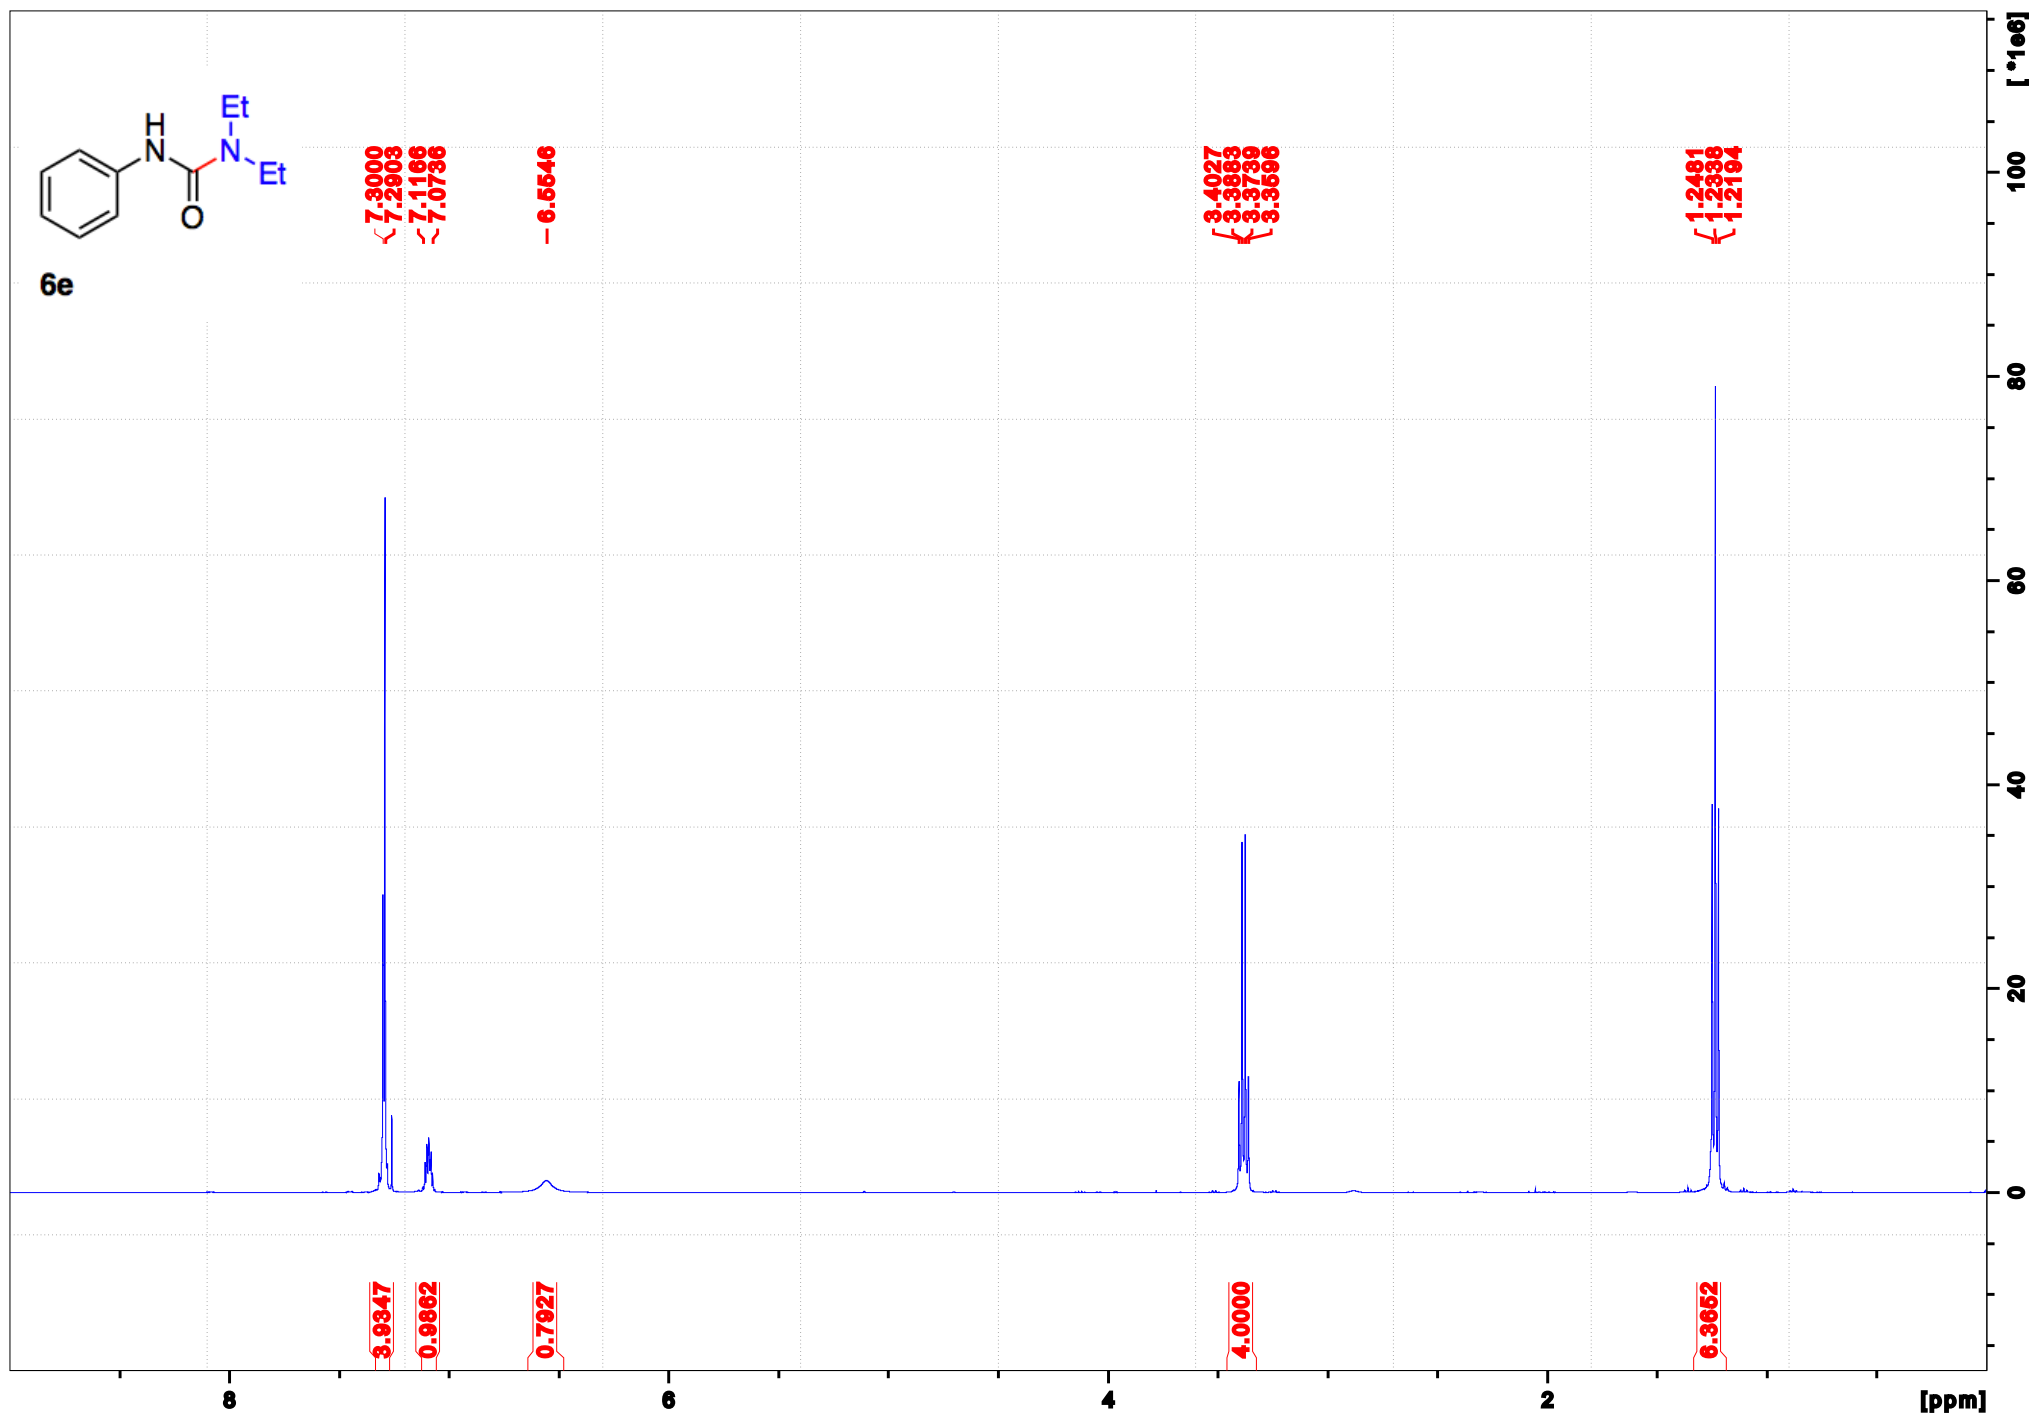

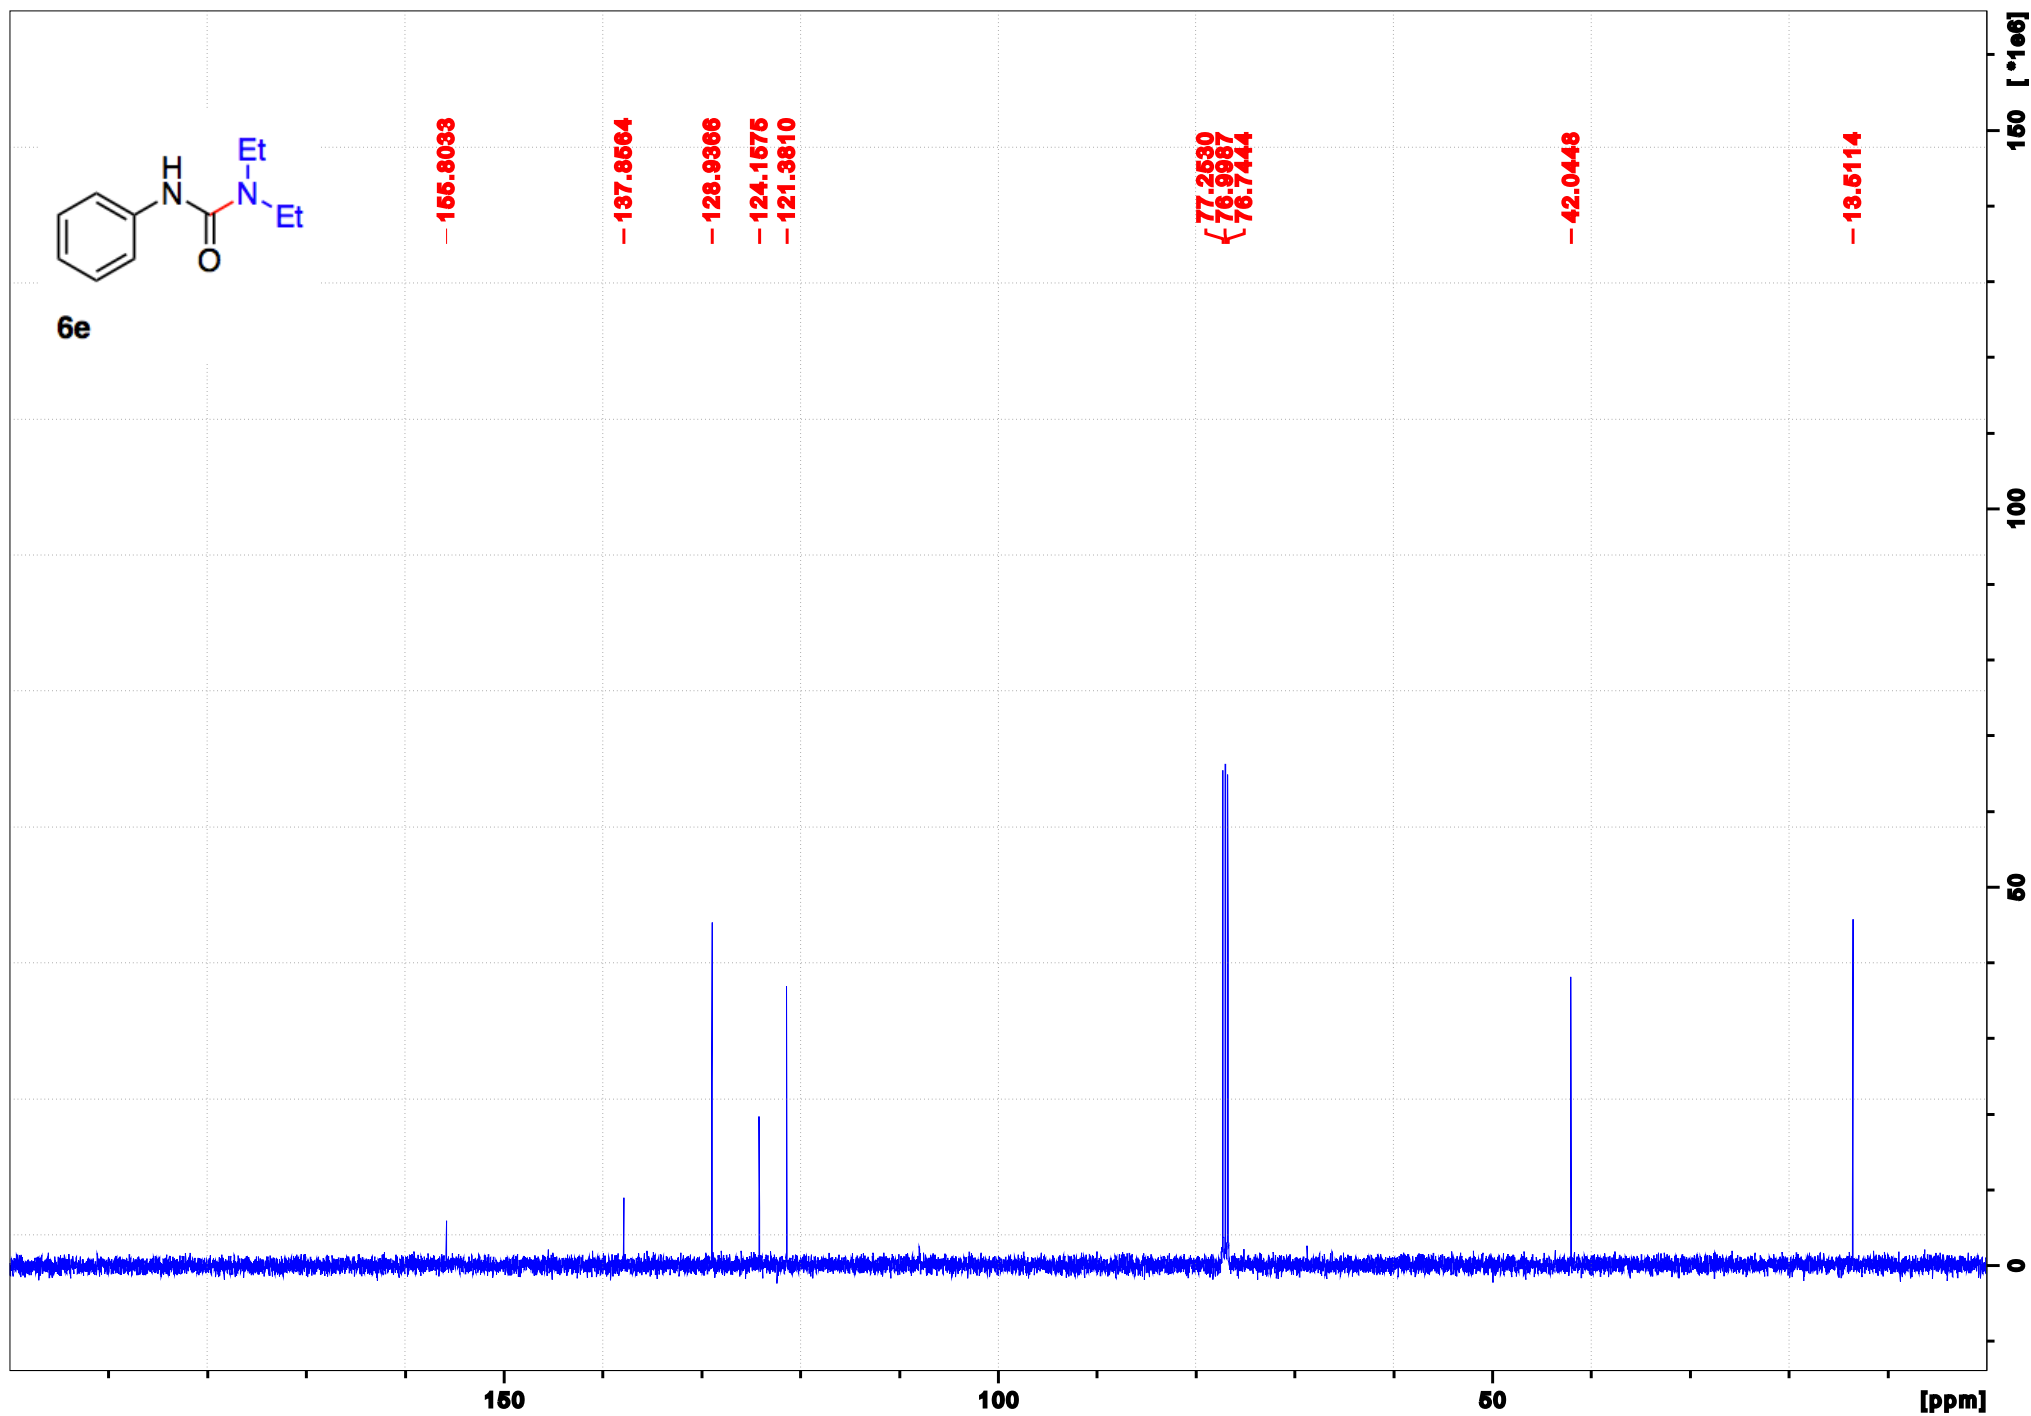

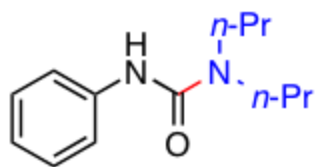

**6f**

7.3873  
7.3679  
7.2774  
7.2588  
7.2380  
7.0166  
6.9982  
6.9799

— 6.3697

3.2694  
3.2505  
3.2312

1.6810  
1.6624  
1.6436  
1.6246  
1.6059  
1.5874

0.9557  
0.9372  
0.9187

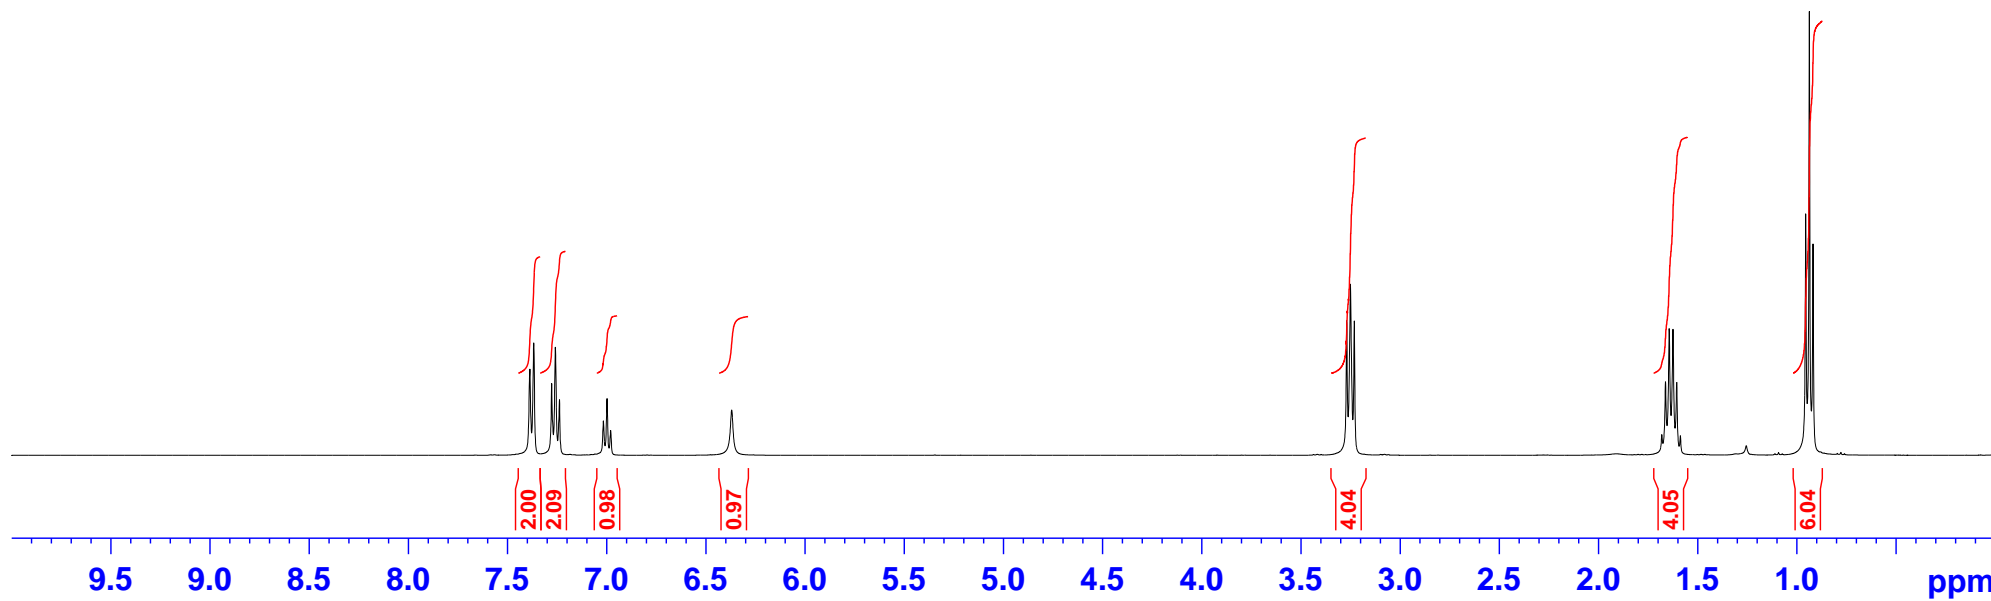

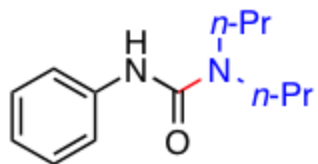

6f

155.0329

139.3576

128.7803

122.7235

119.8046

49.4199

21.8649

11.4157

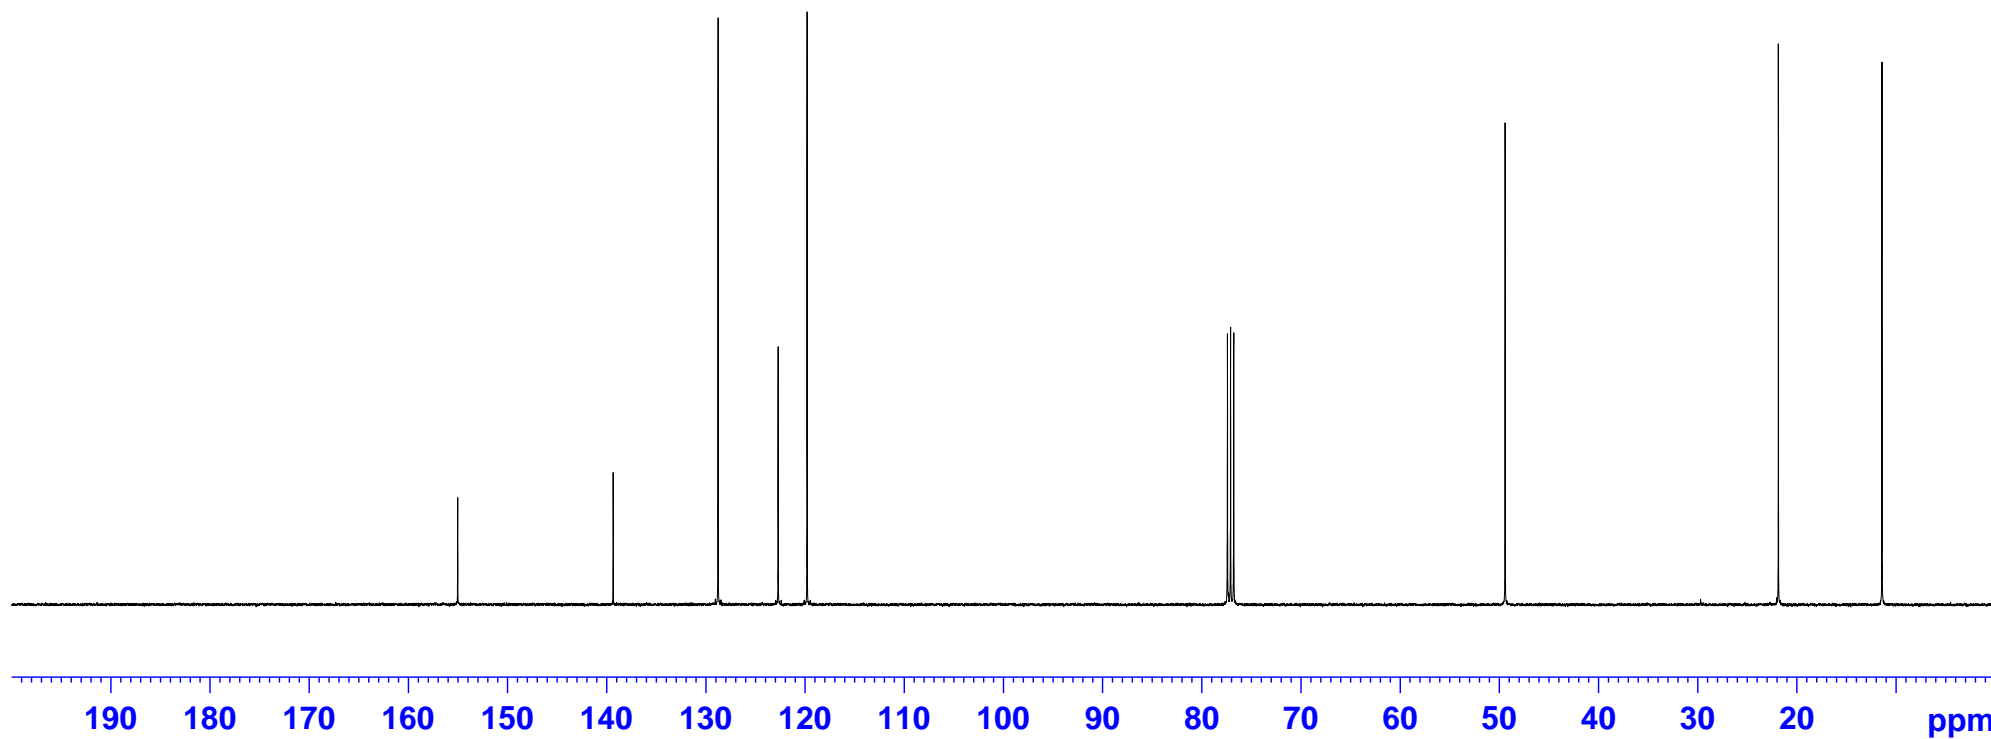

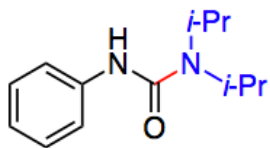

6g

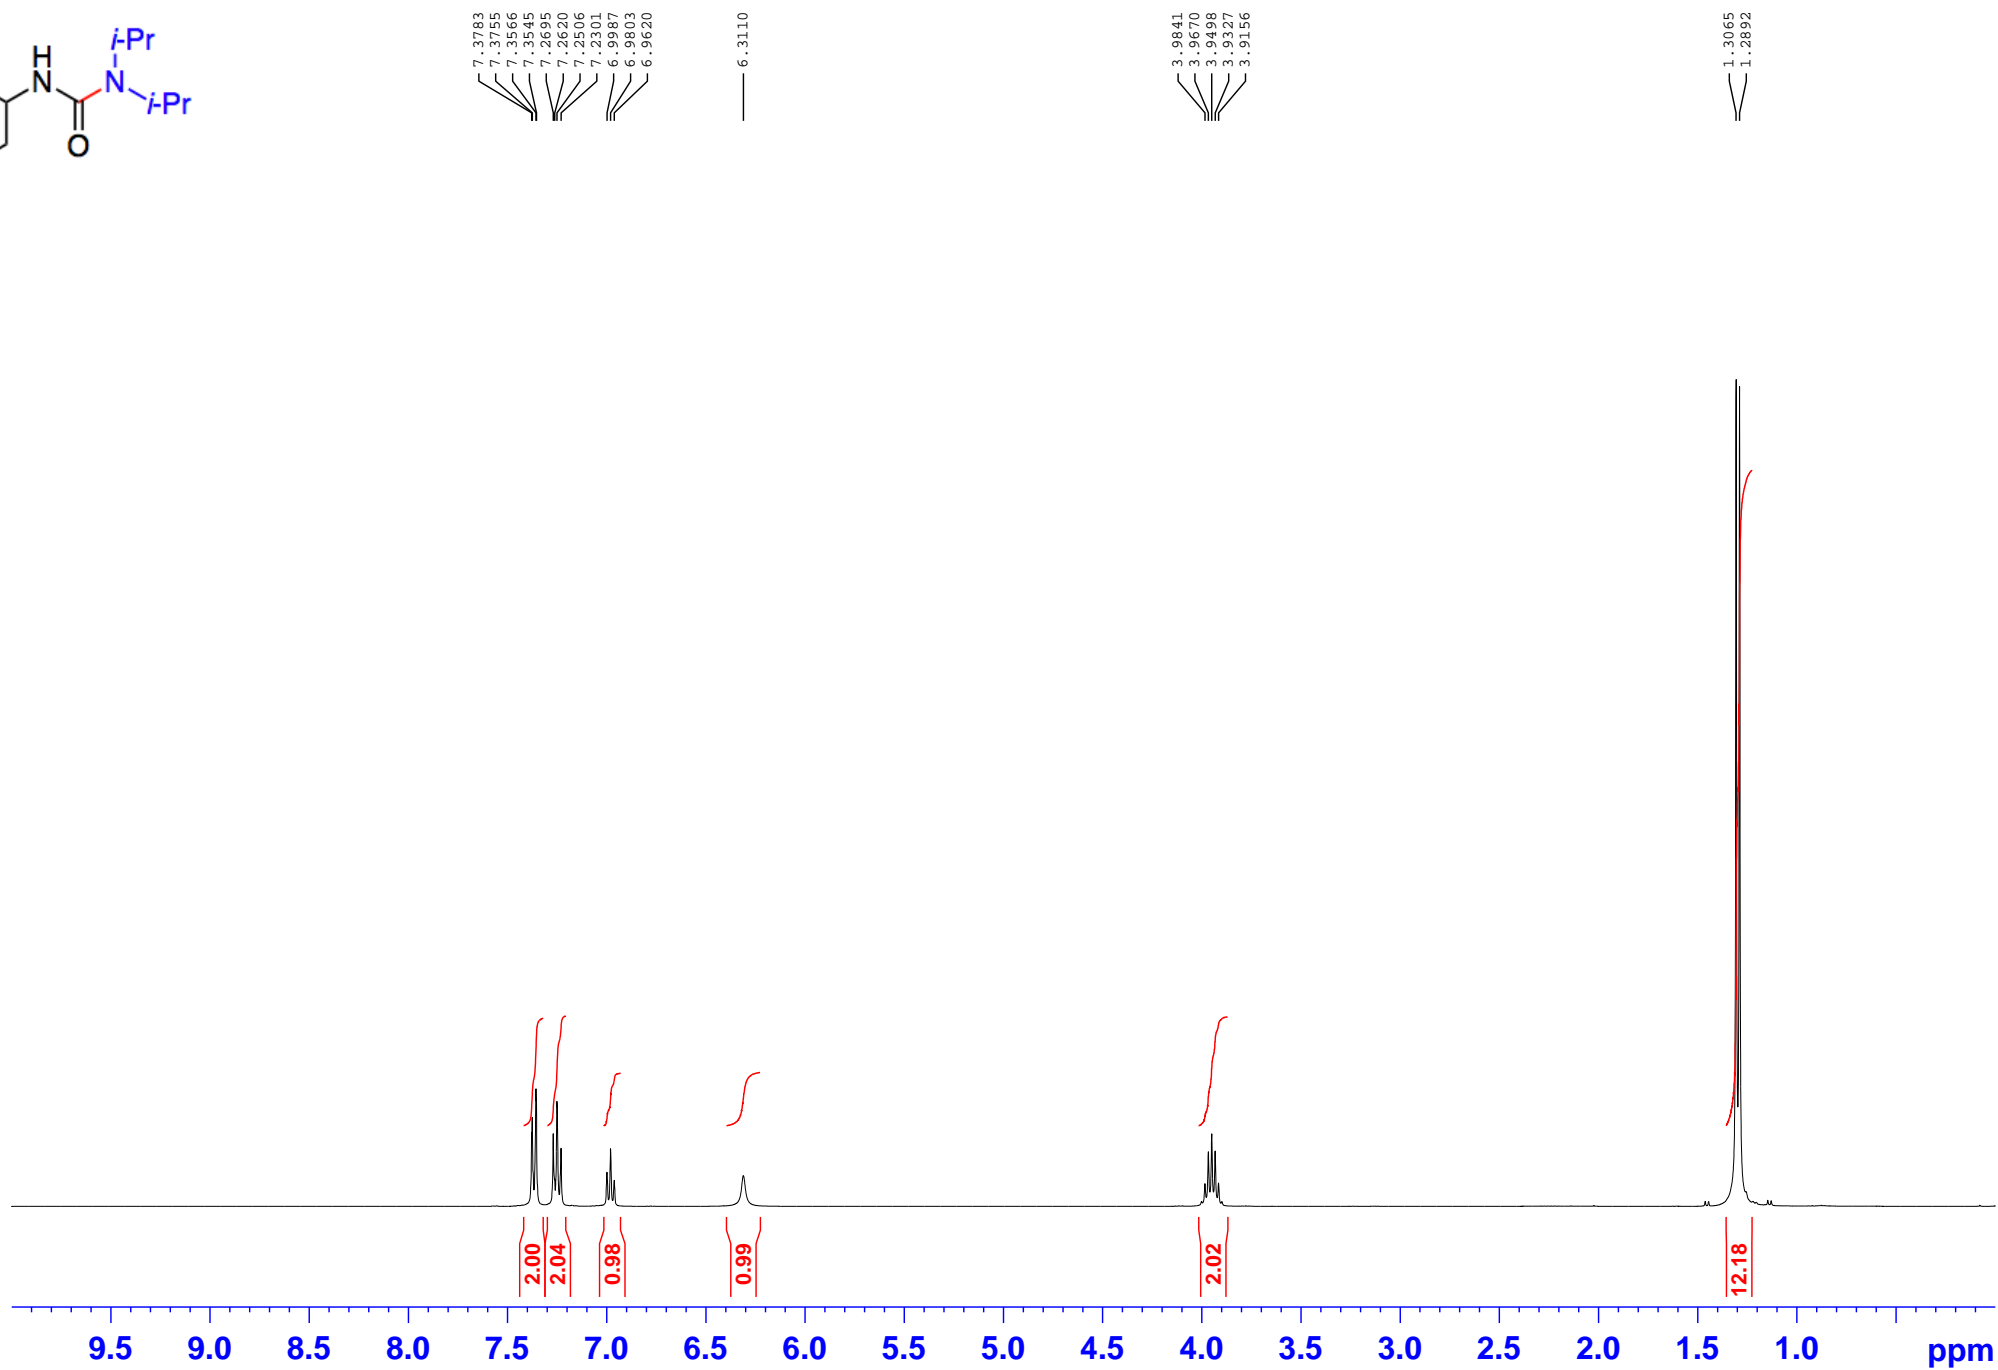



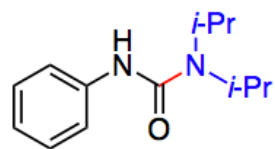

6g

154.6485

139.4606

128.7973

122.5447

119.7473

45.5145

21.5155

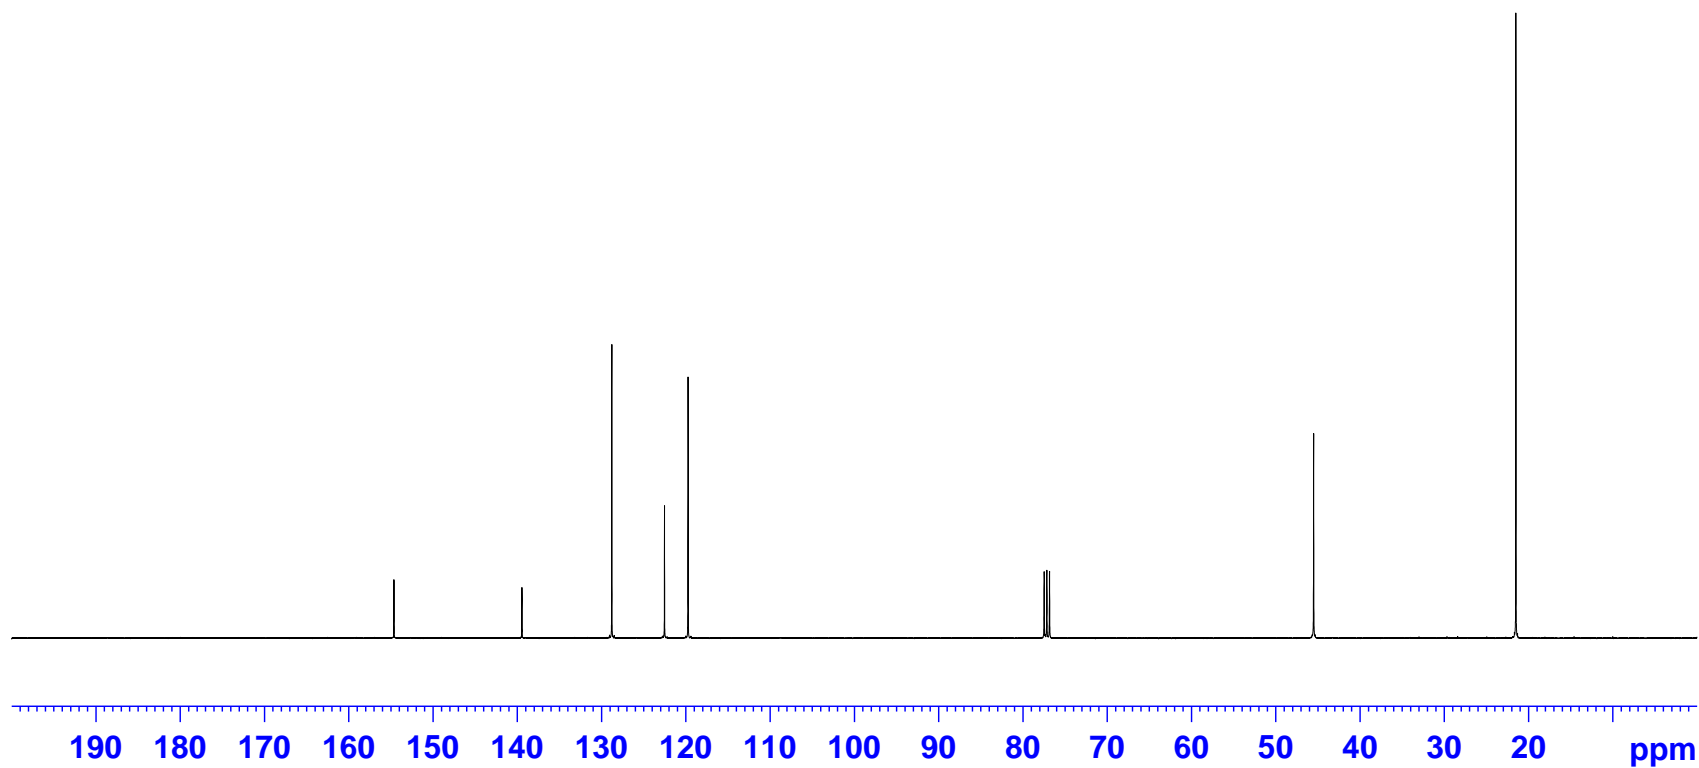

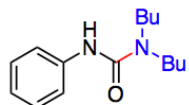

6h

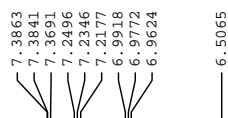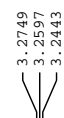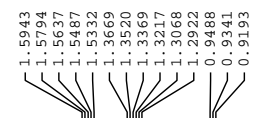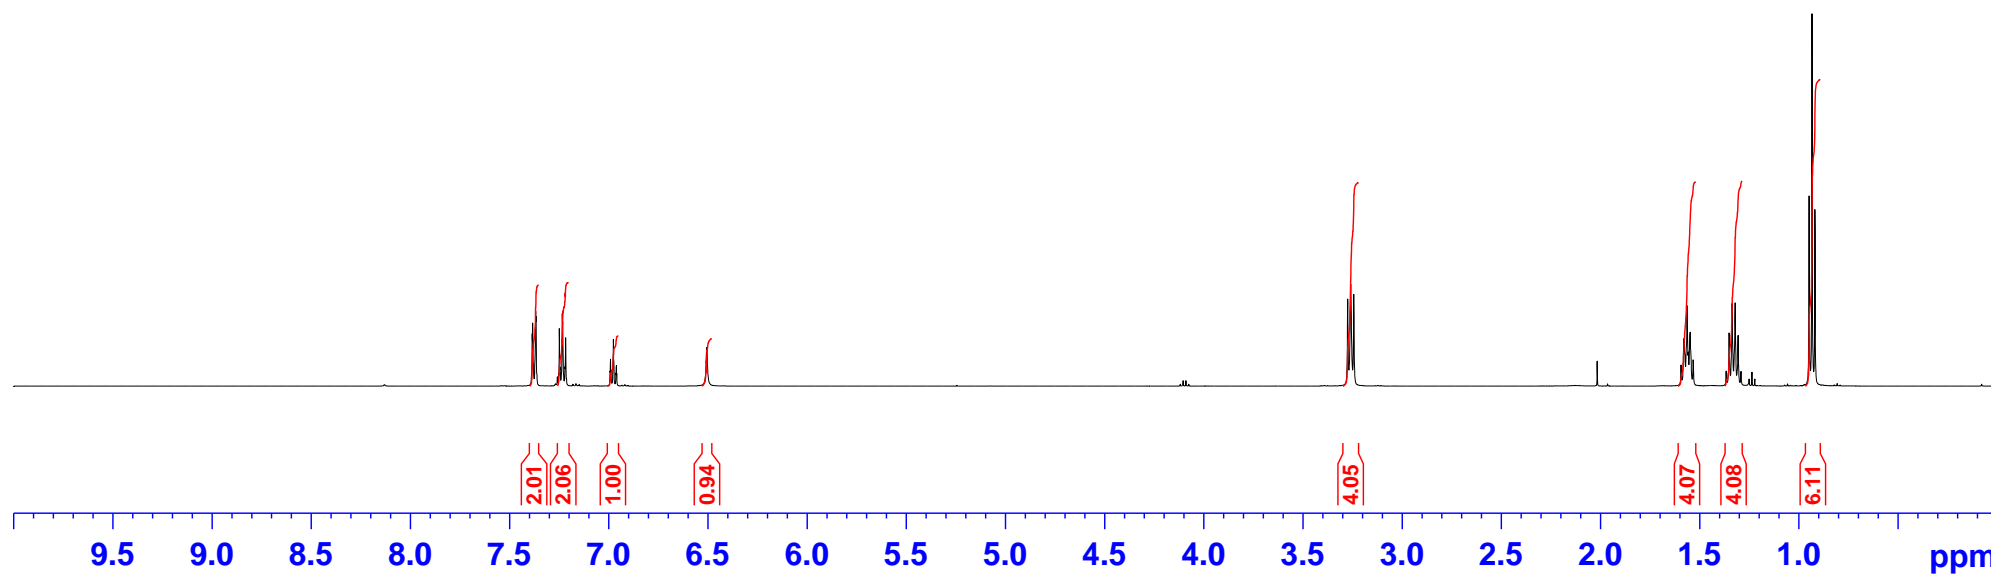

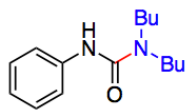

6h

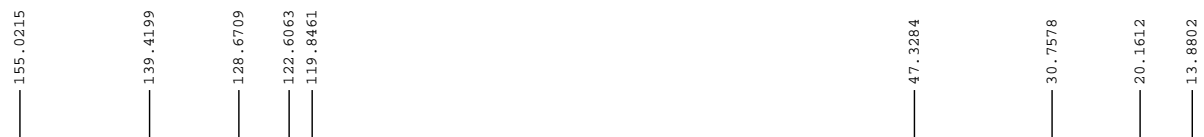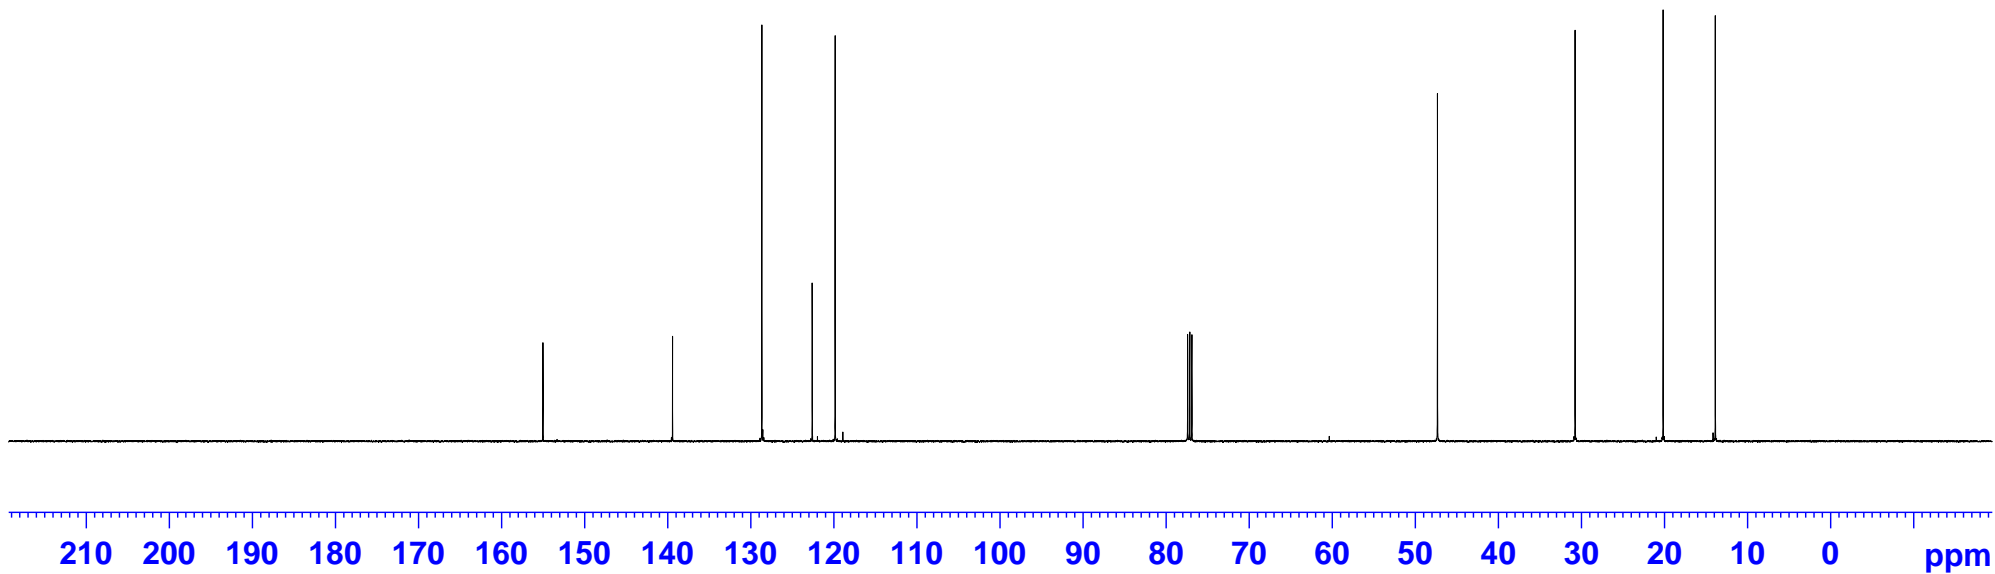

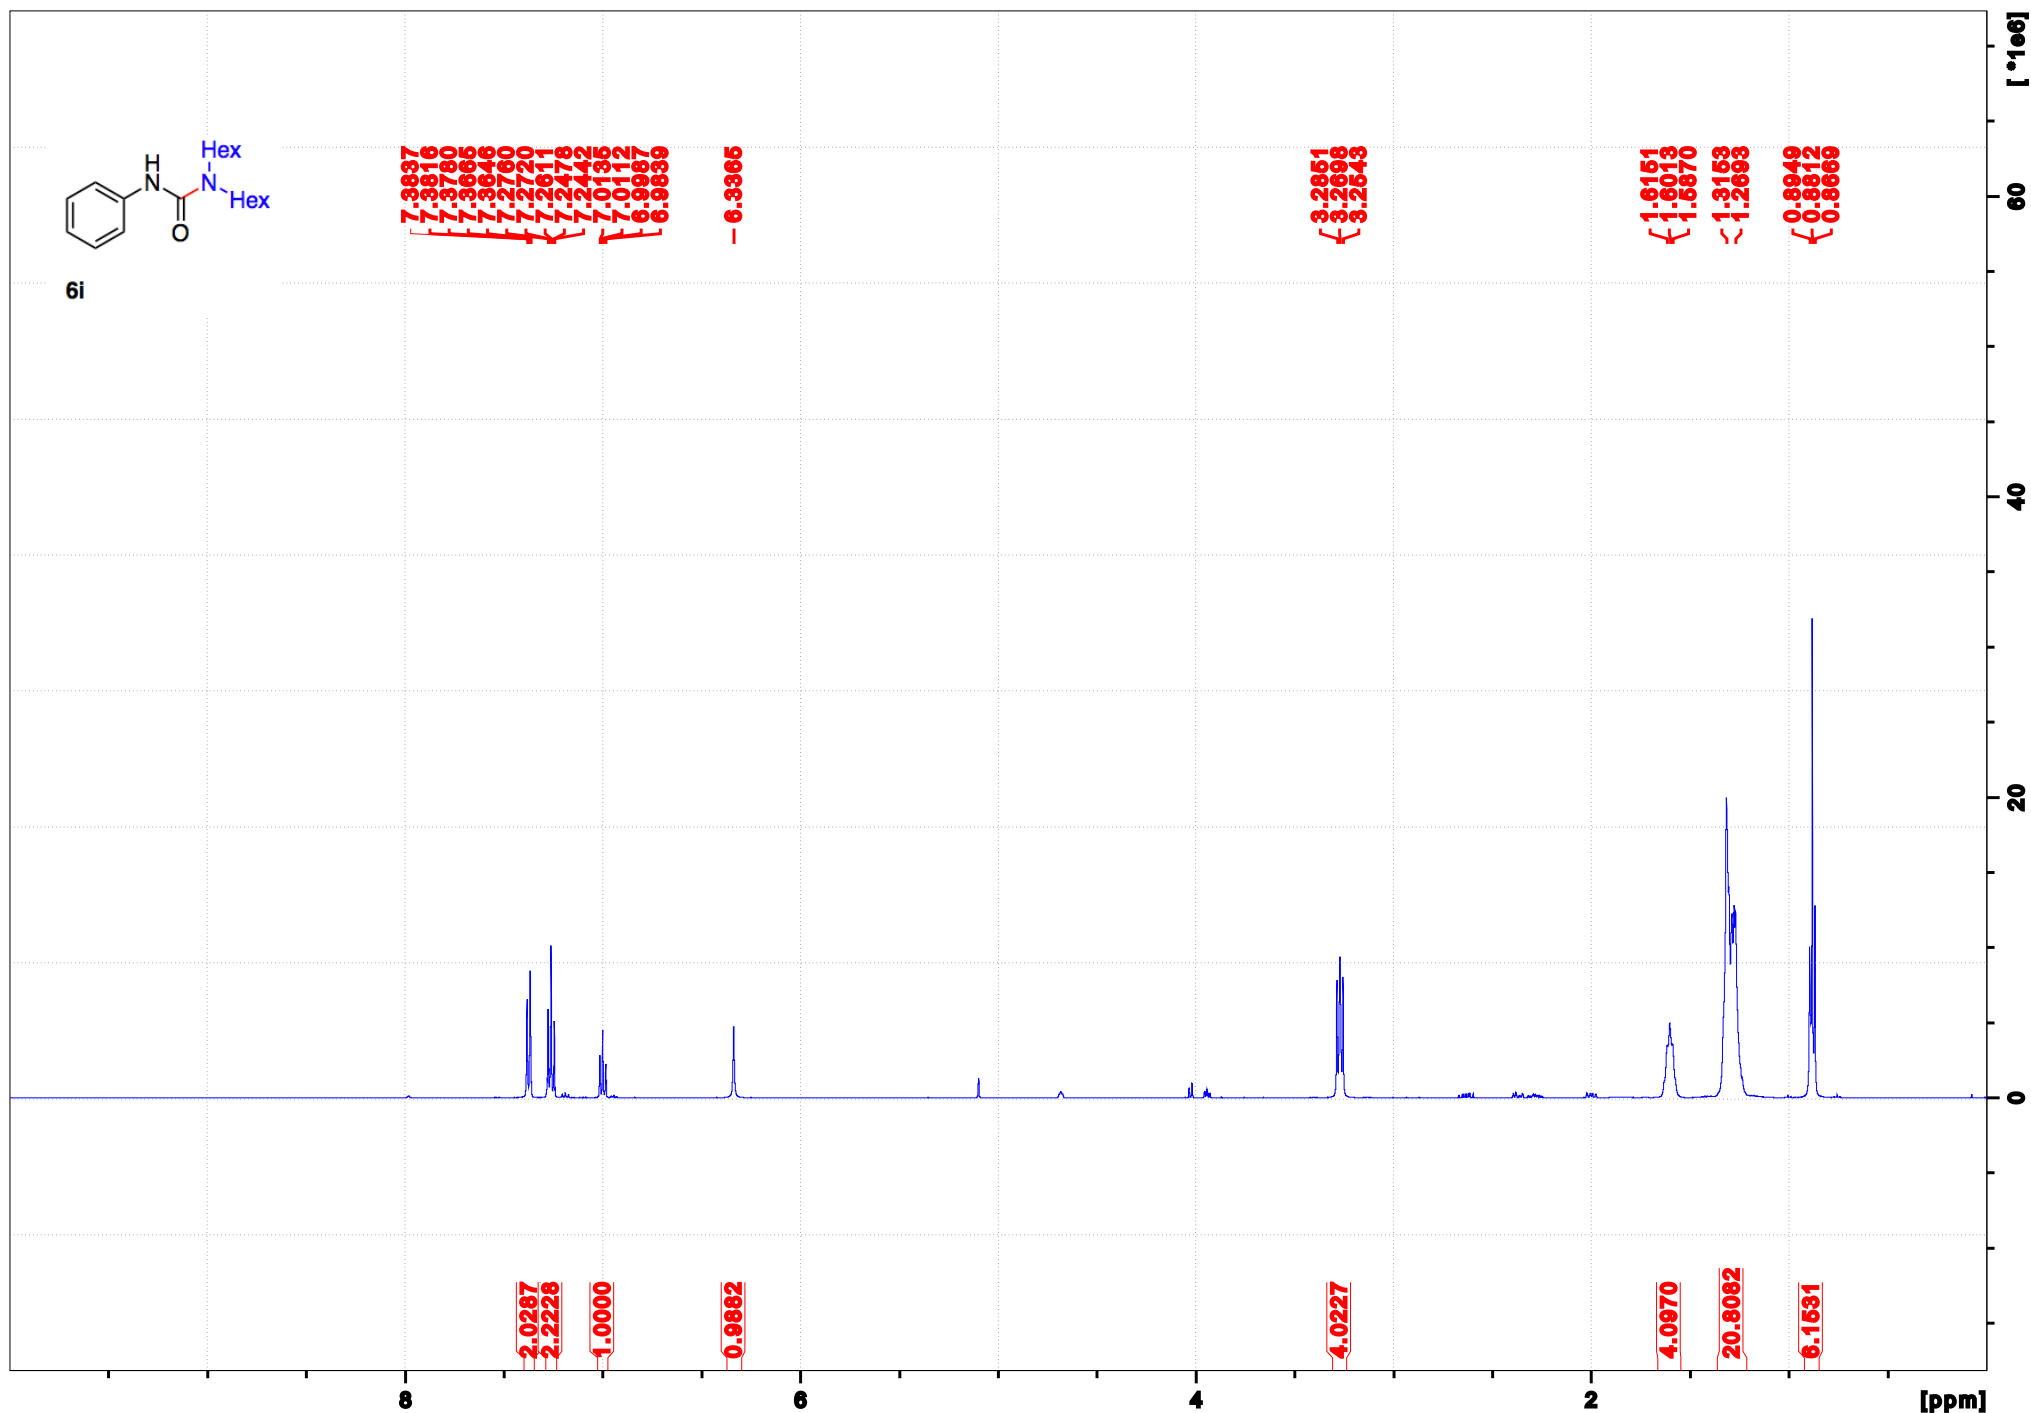

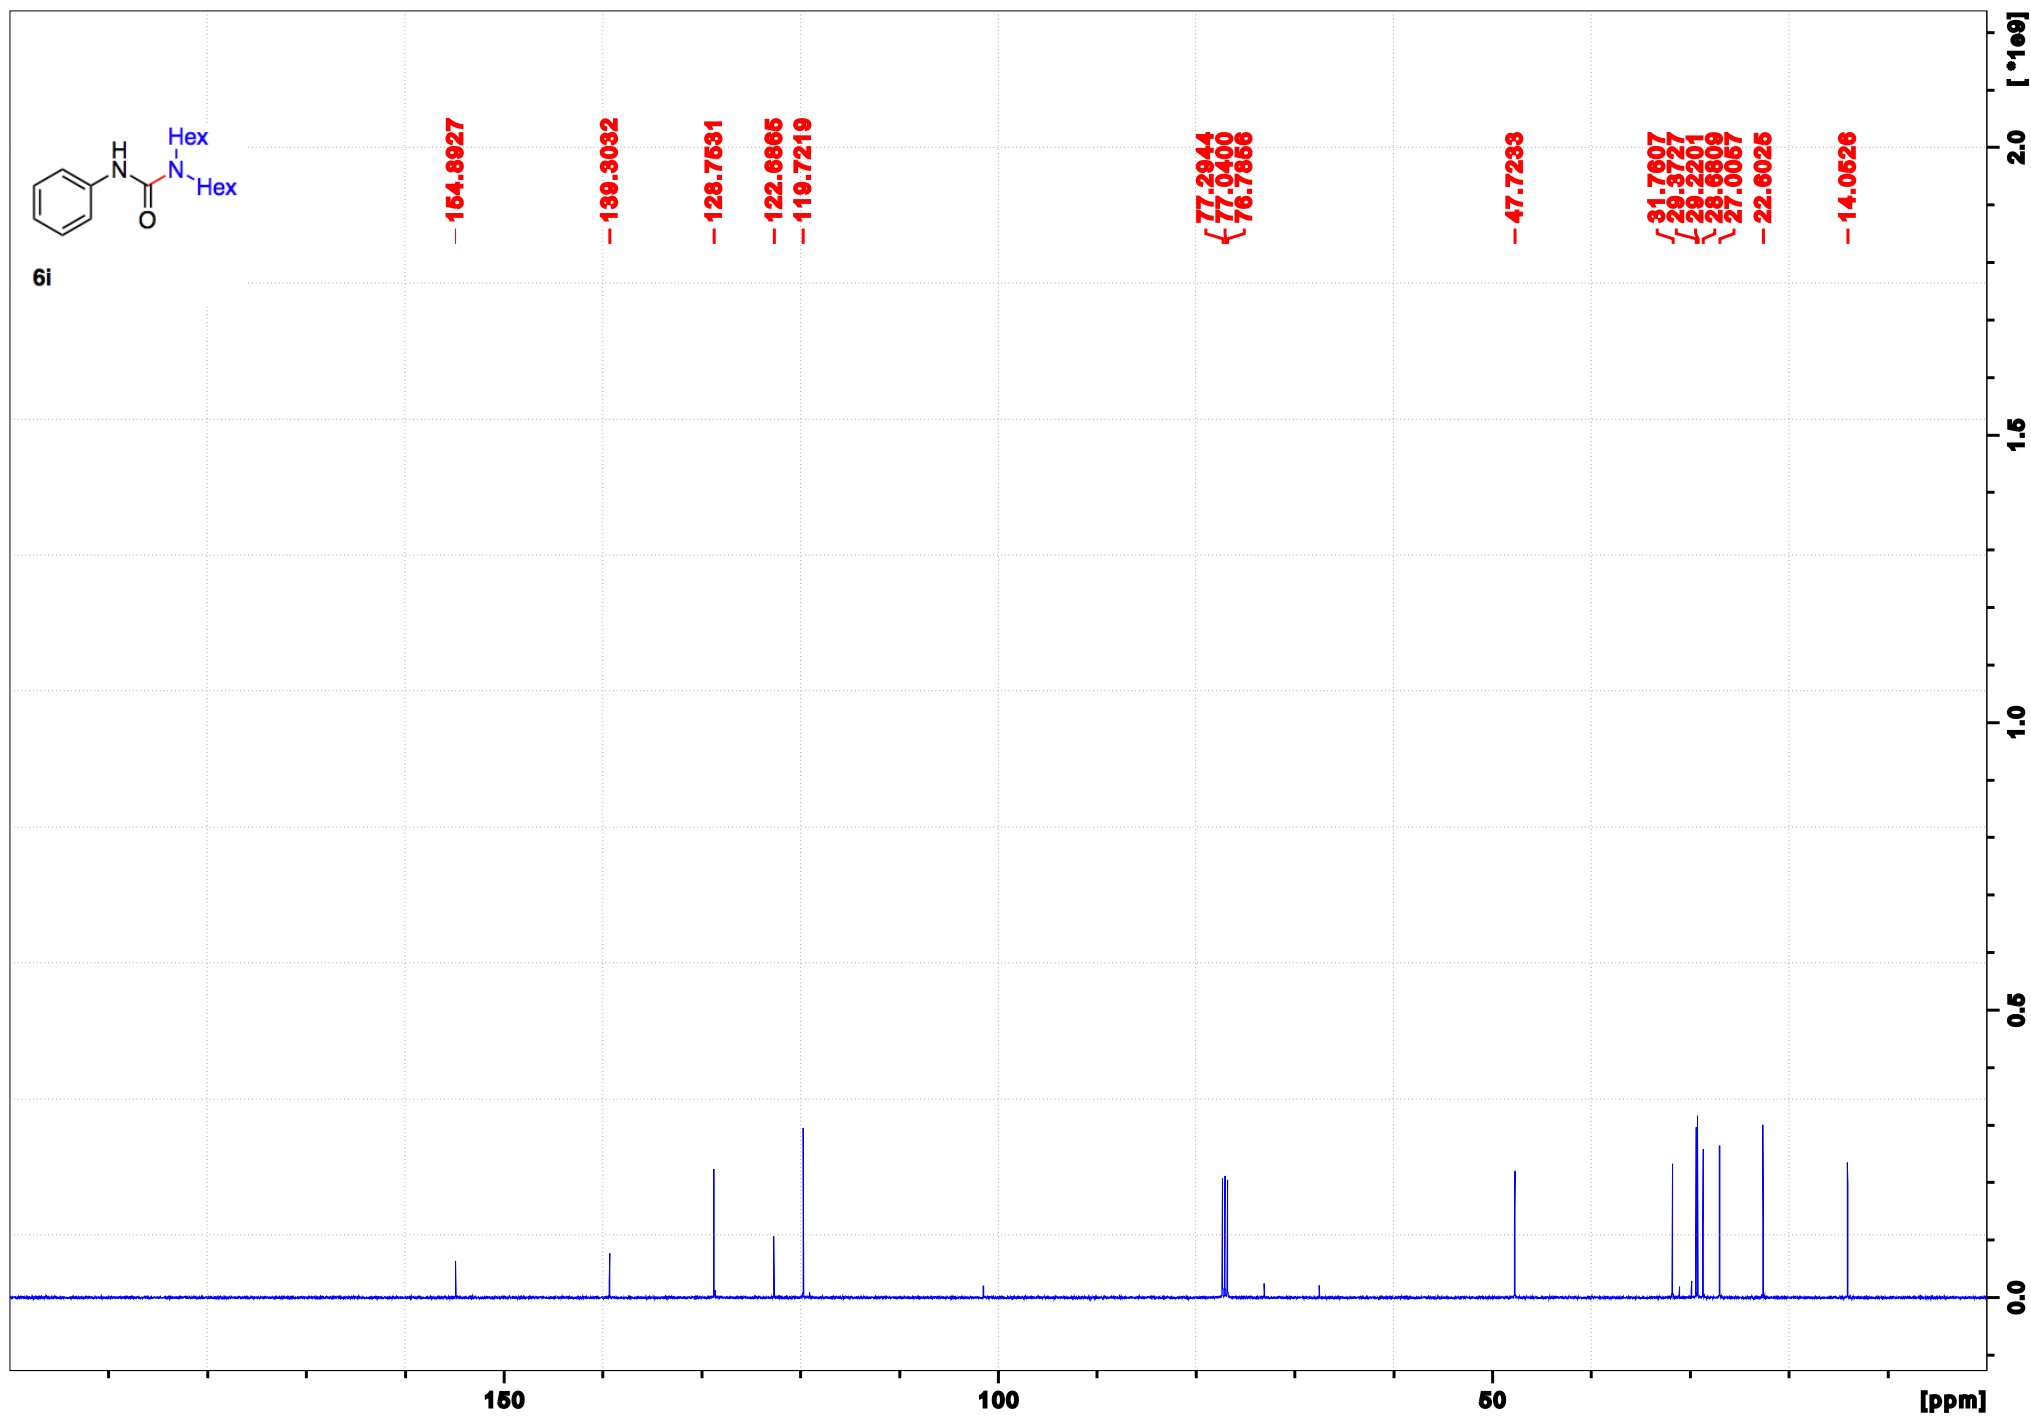

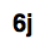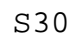

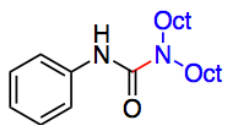

6j

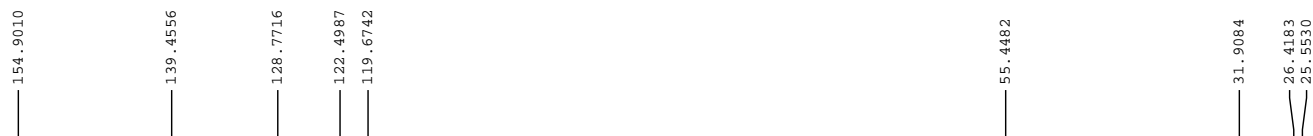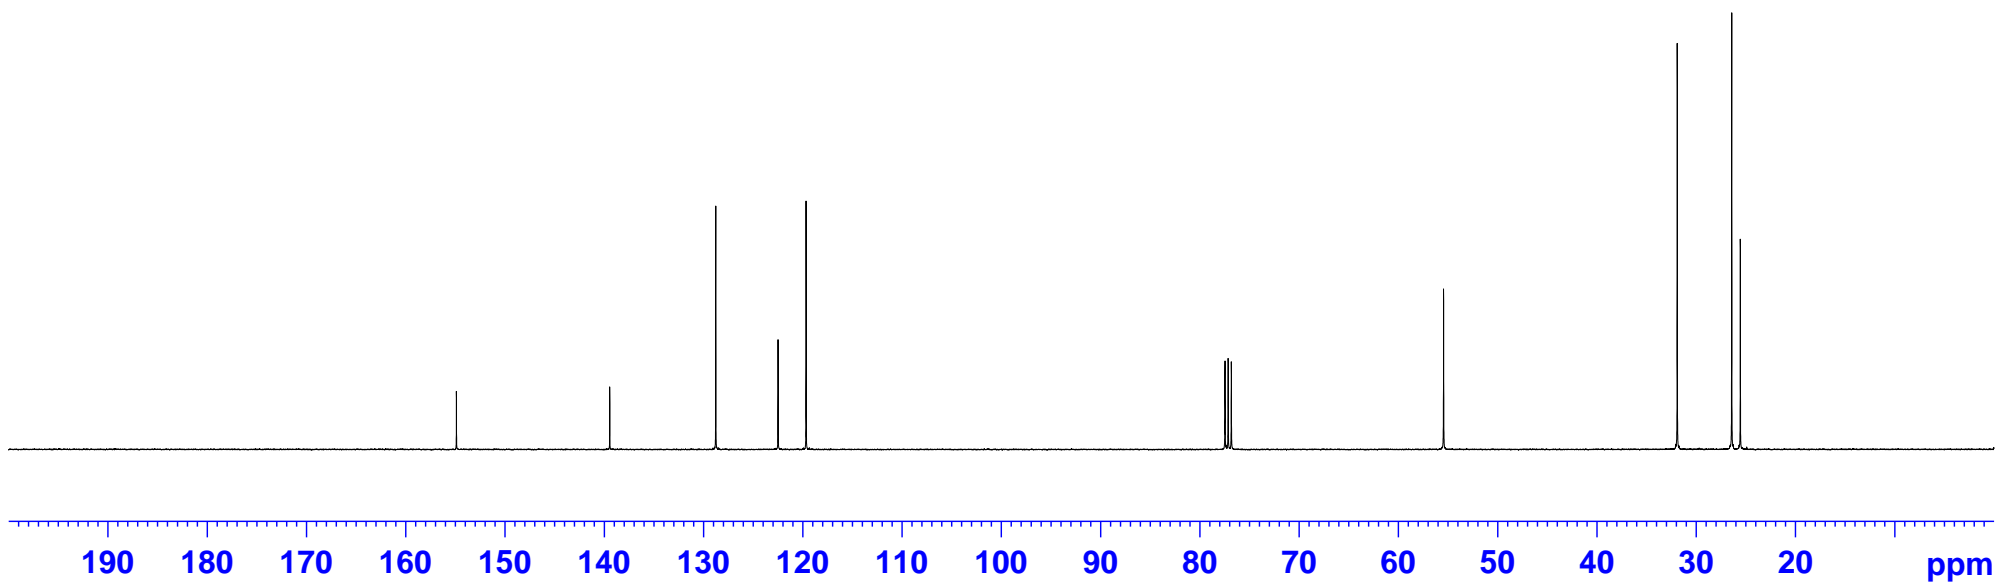

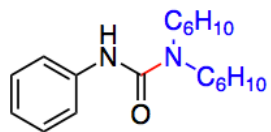

6k

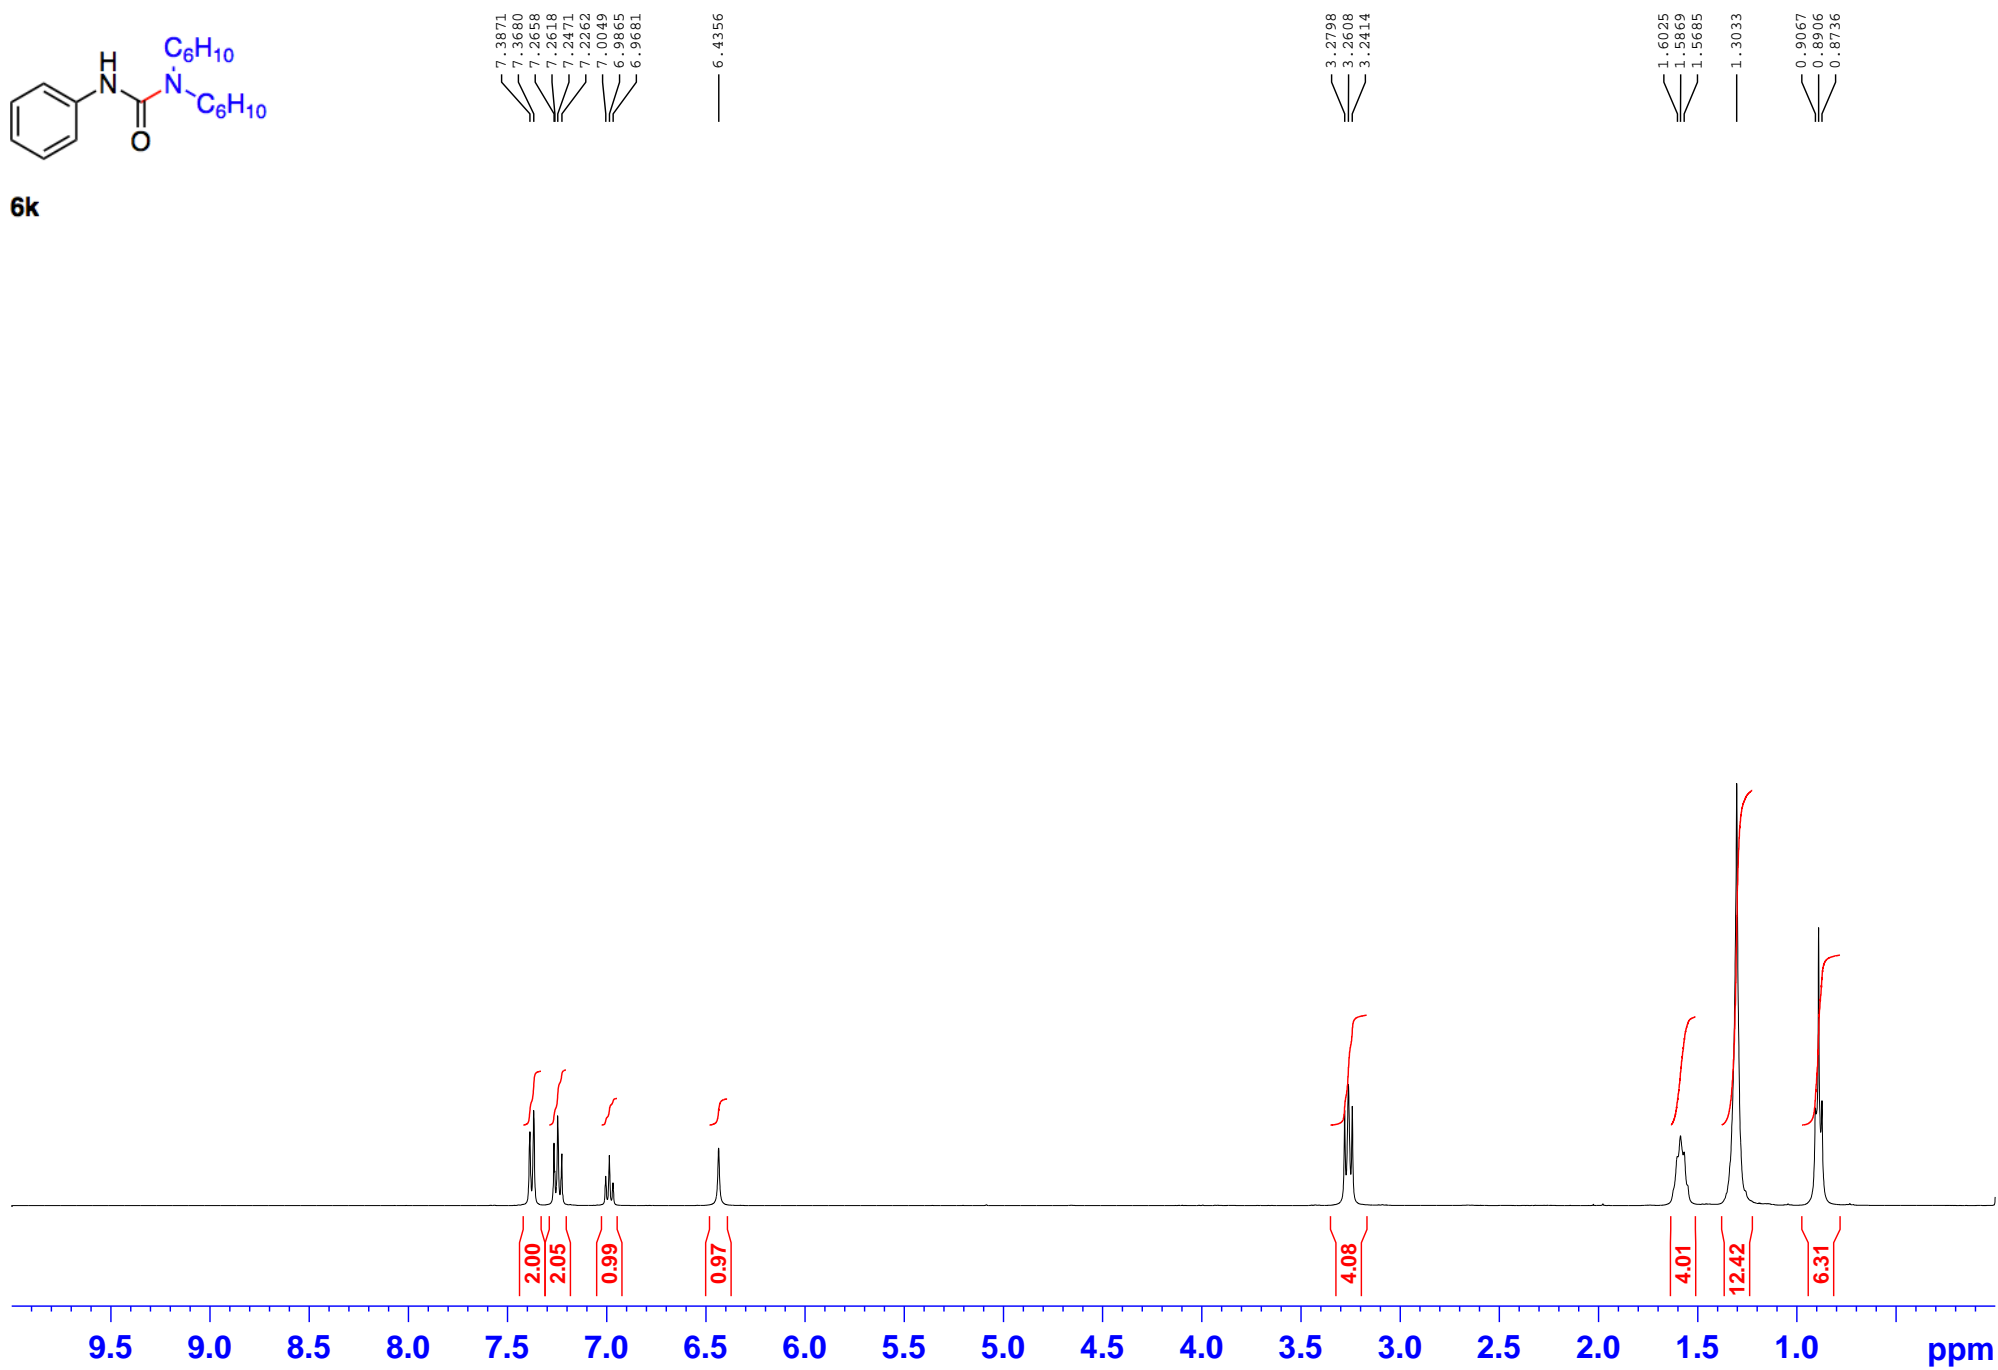



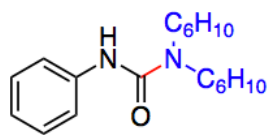

6k

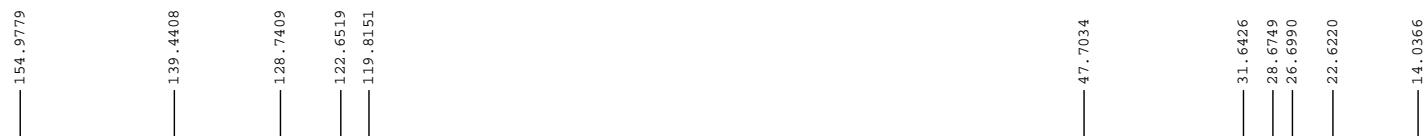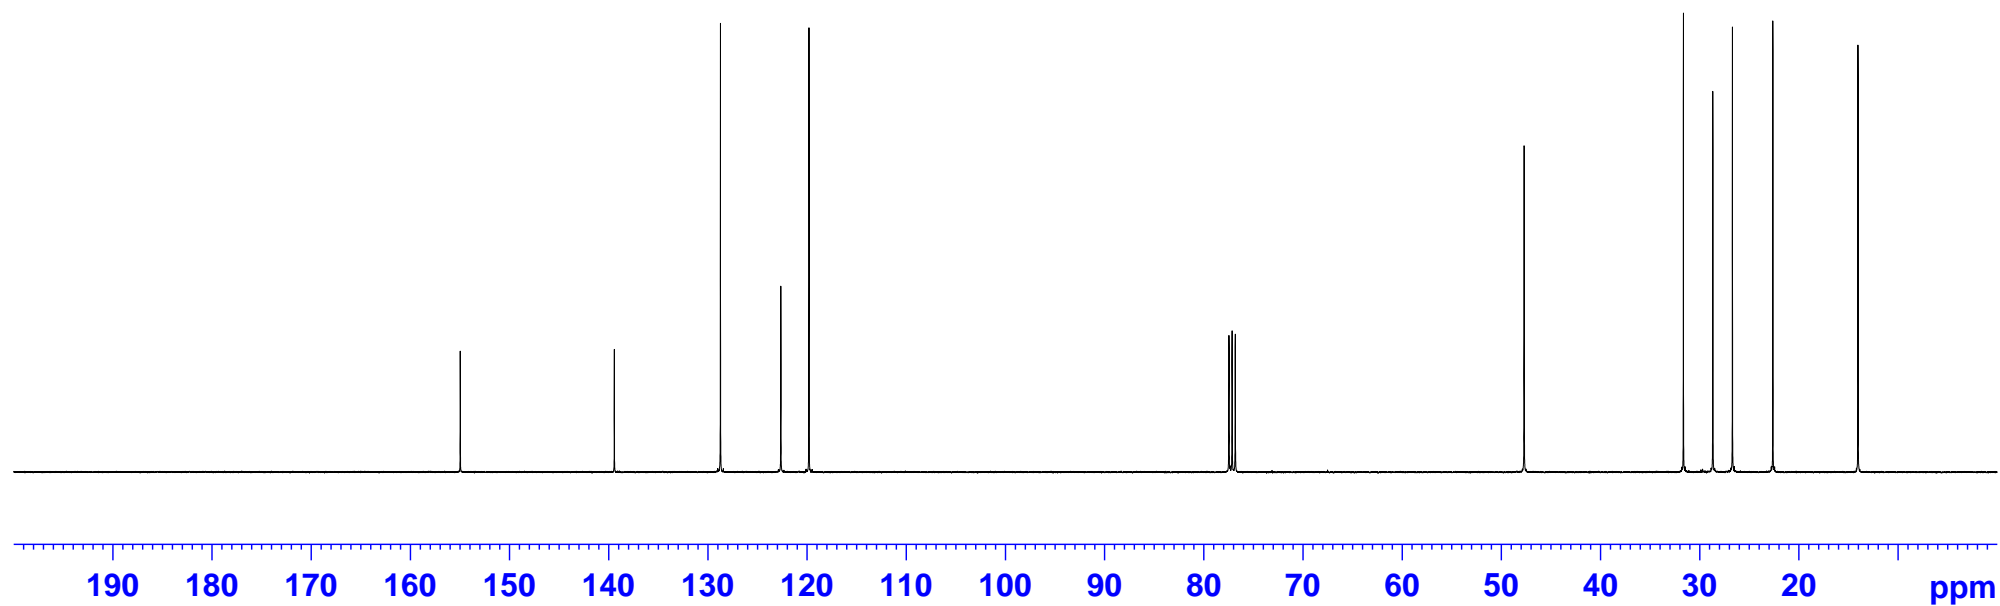

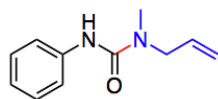

6l

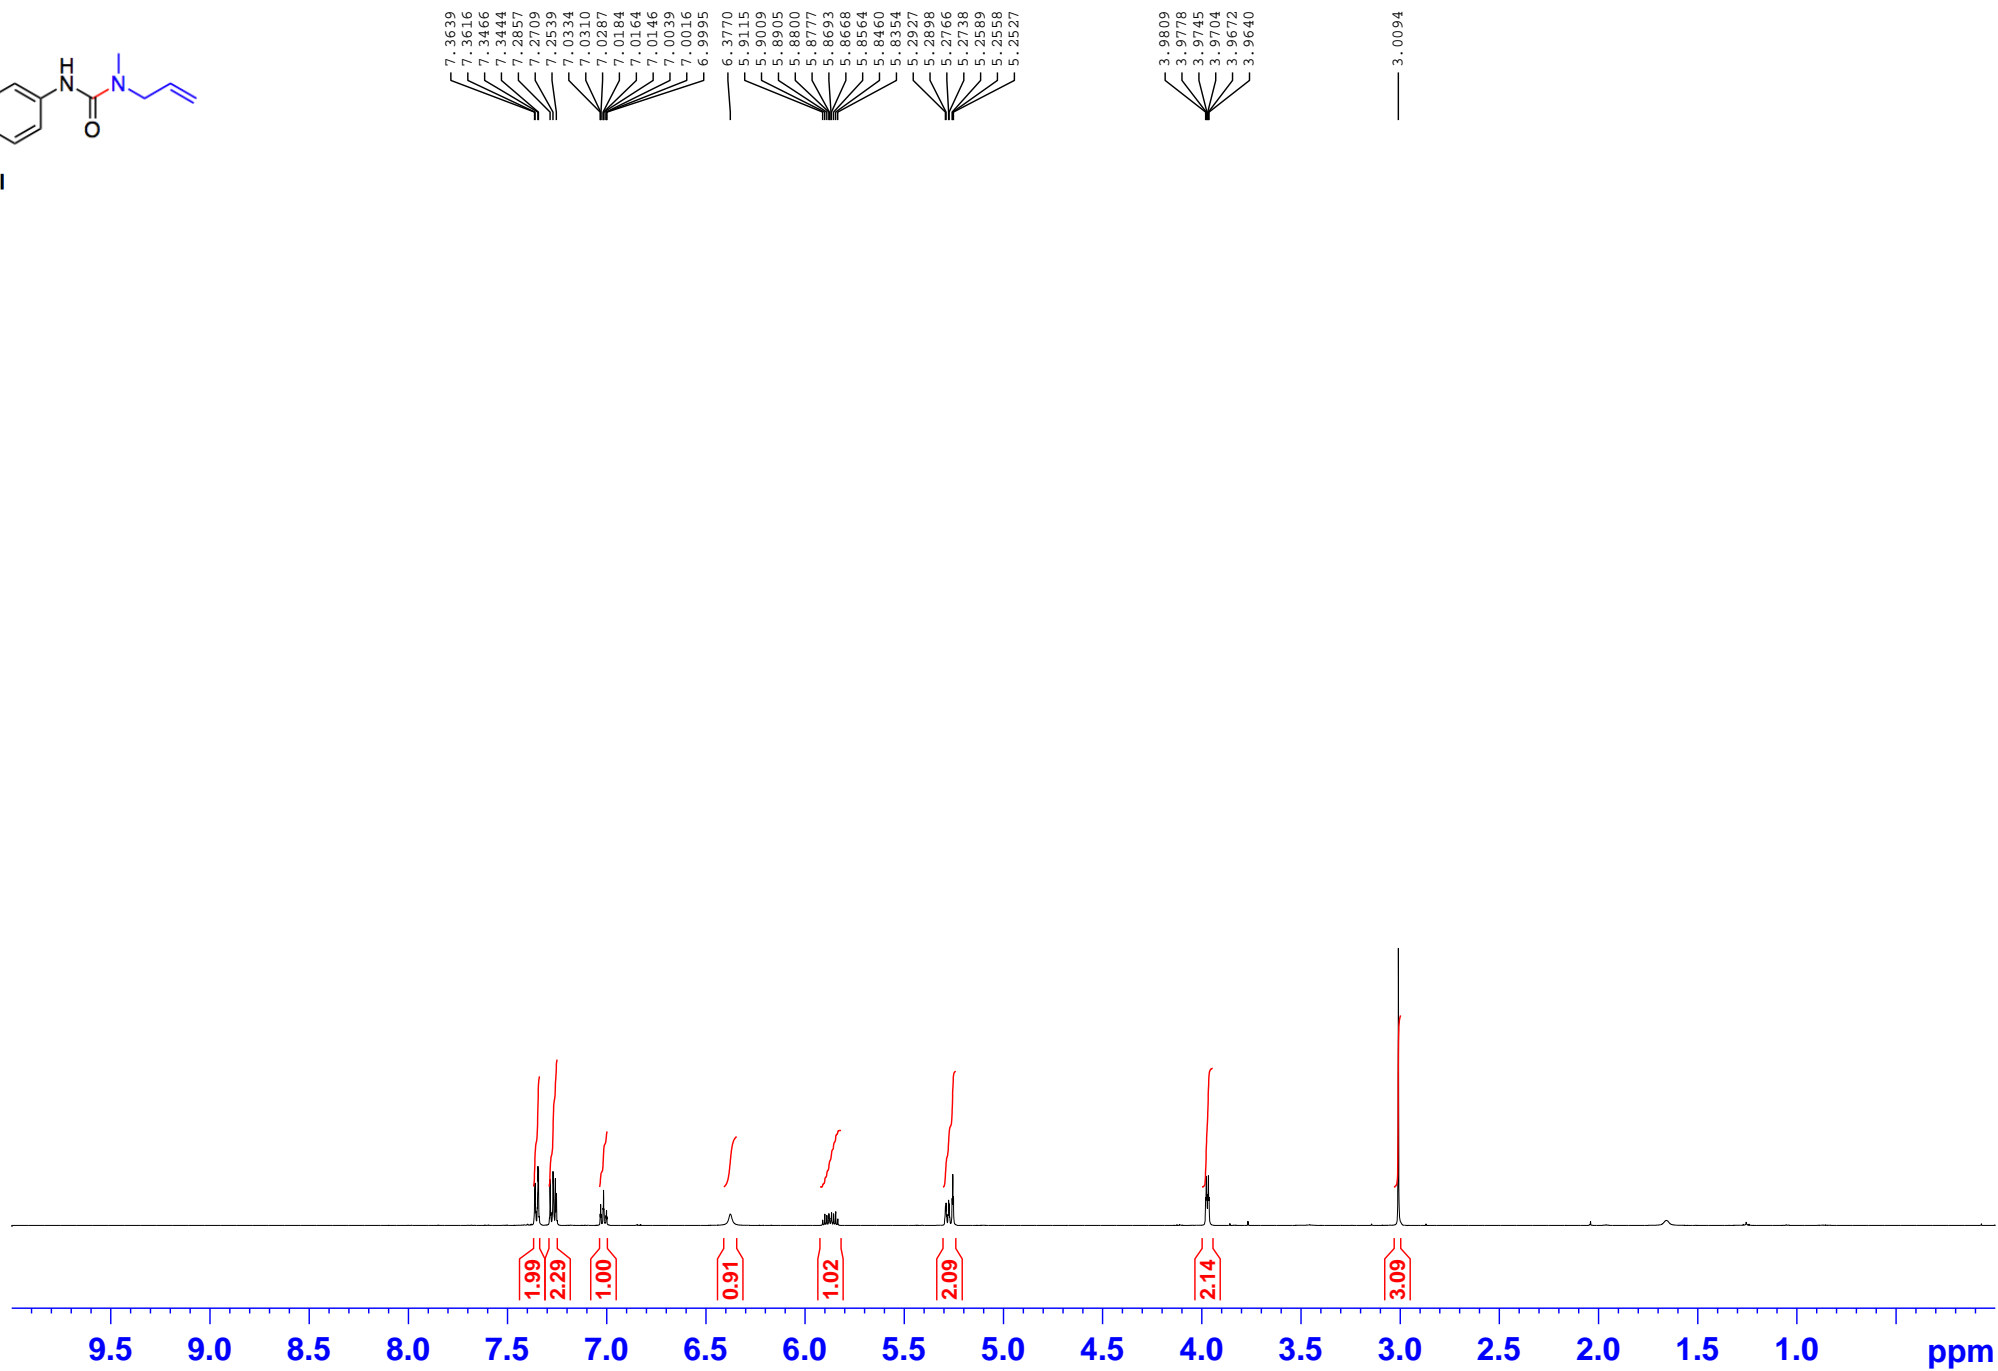

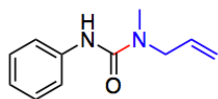

6l

155.5368

139.1750

133.4821

128.8263

122.9387

119.7625

116.9699

51.5779

34.6097

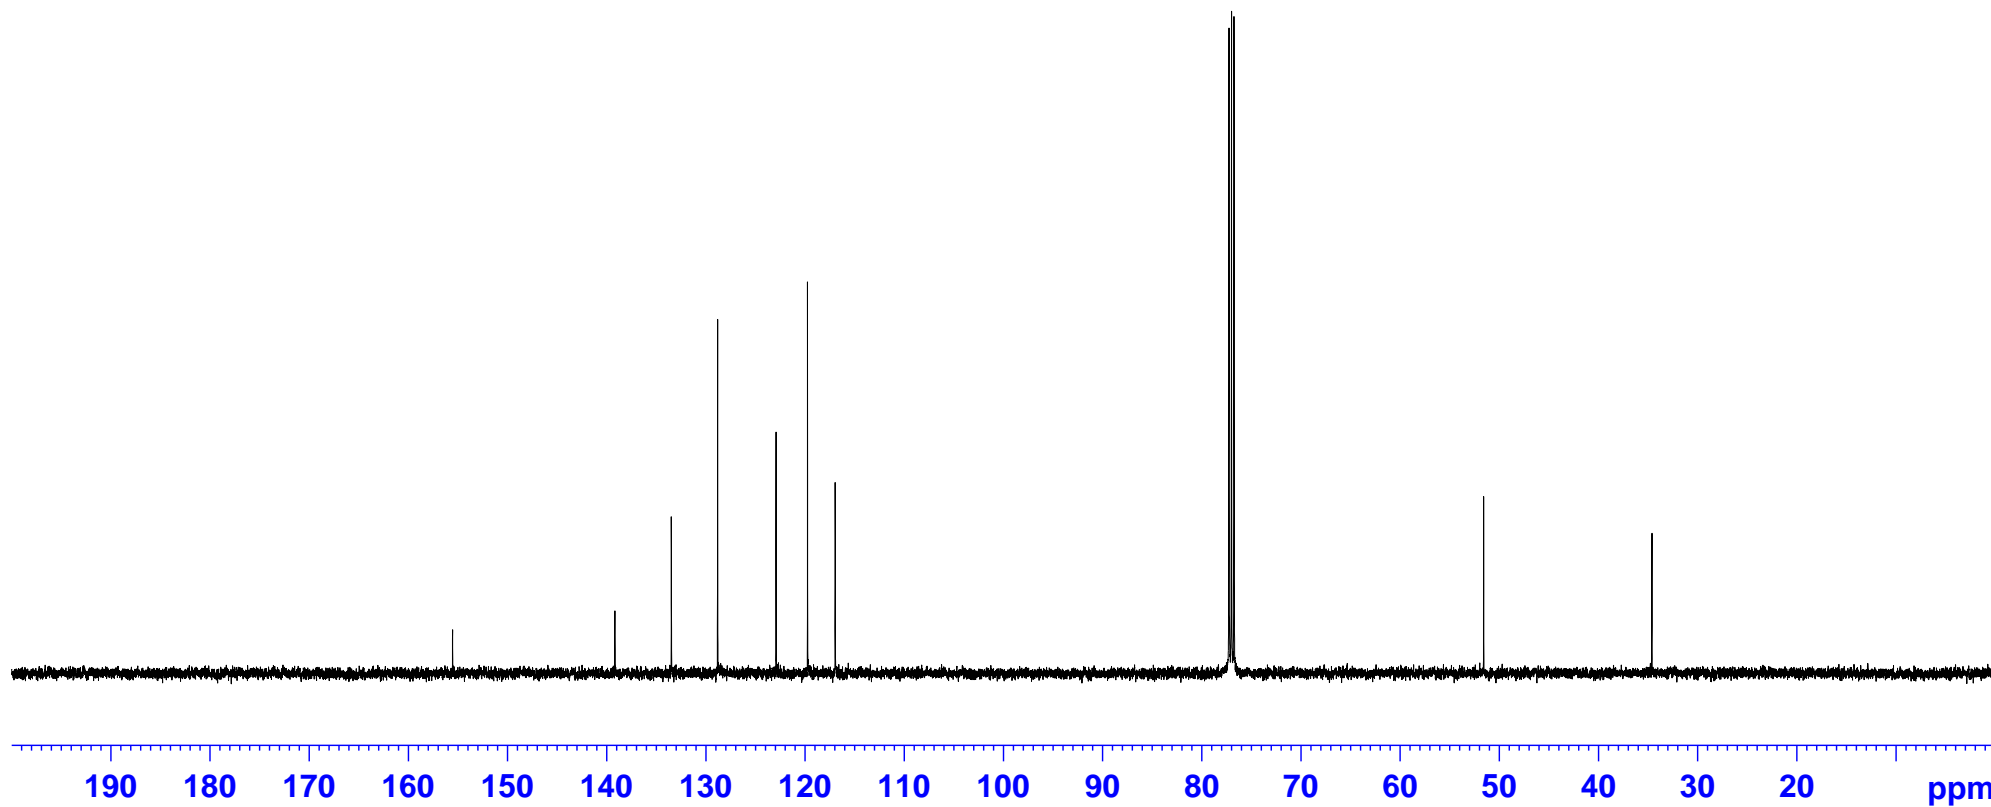

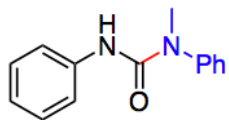

6m

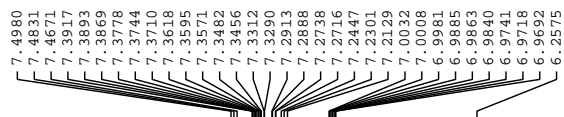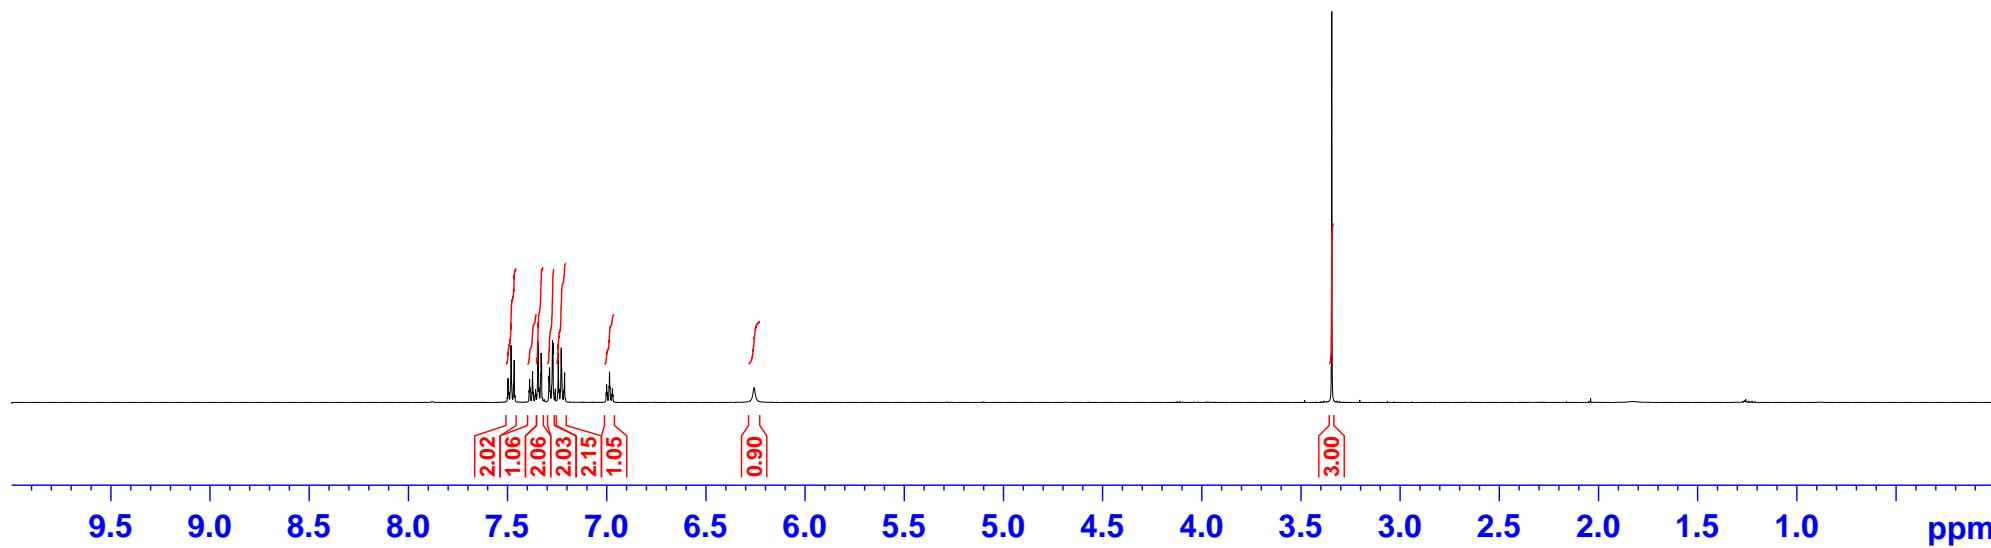

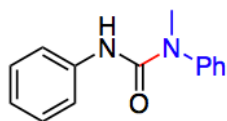

6m

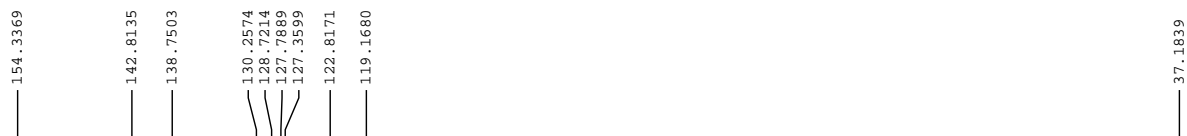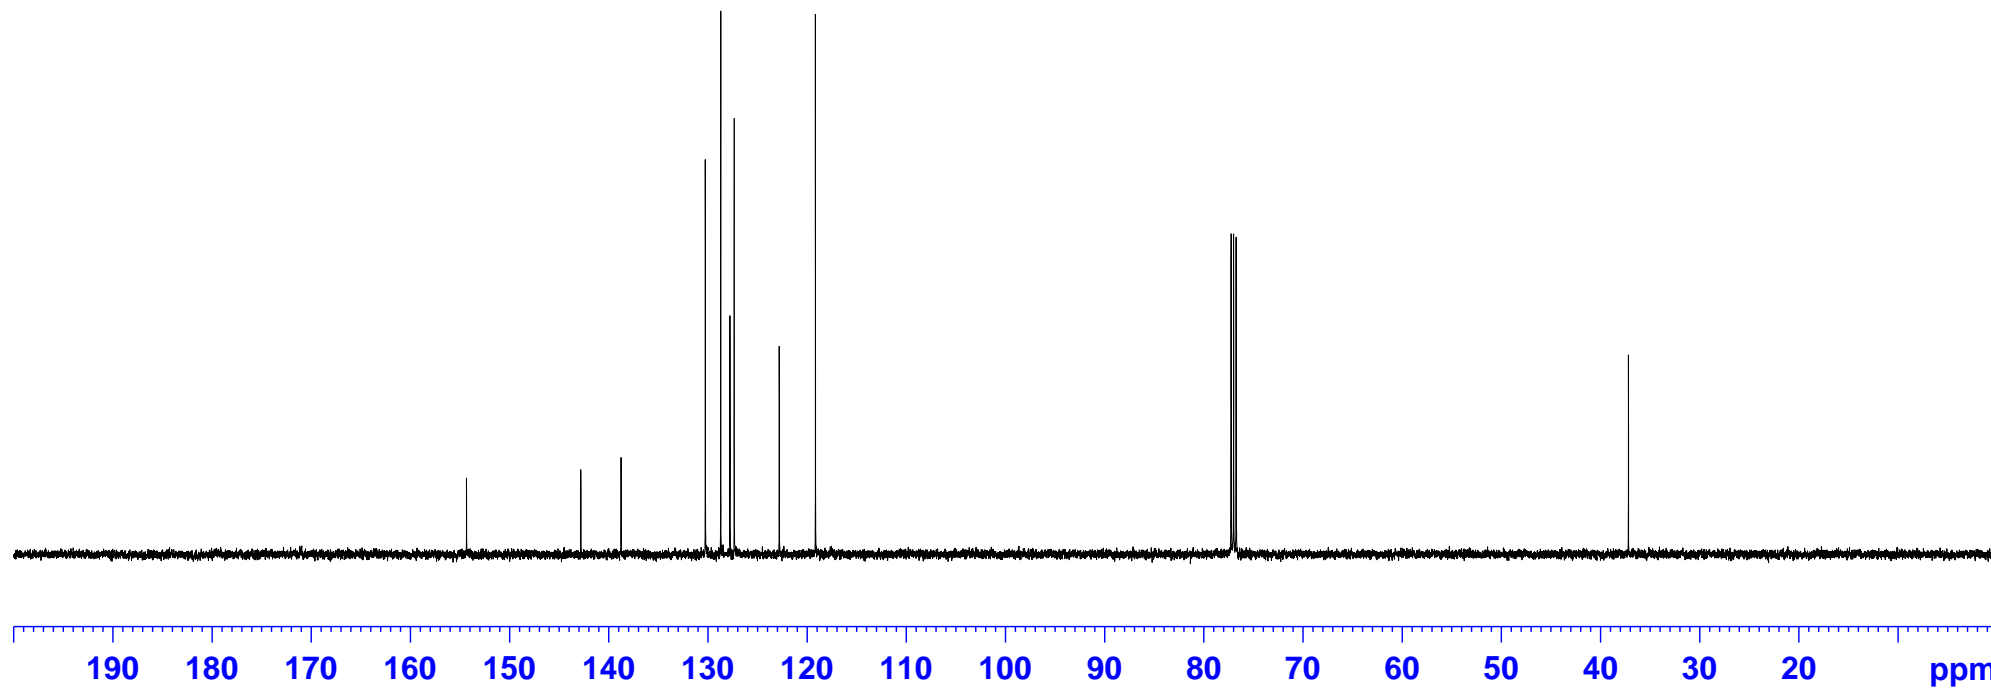

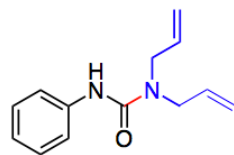

6n

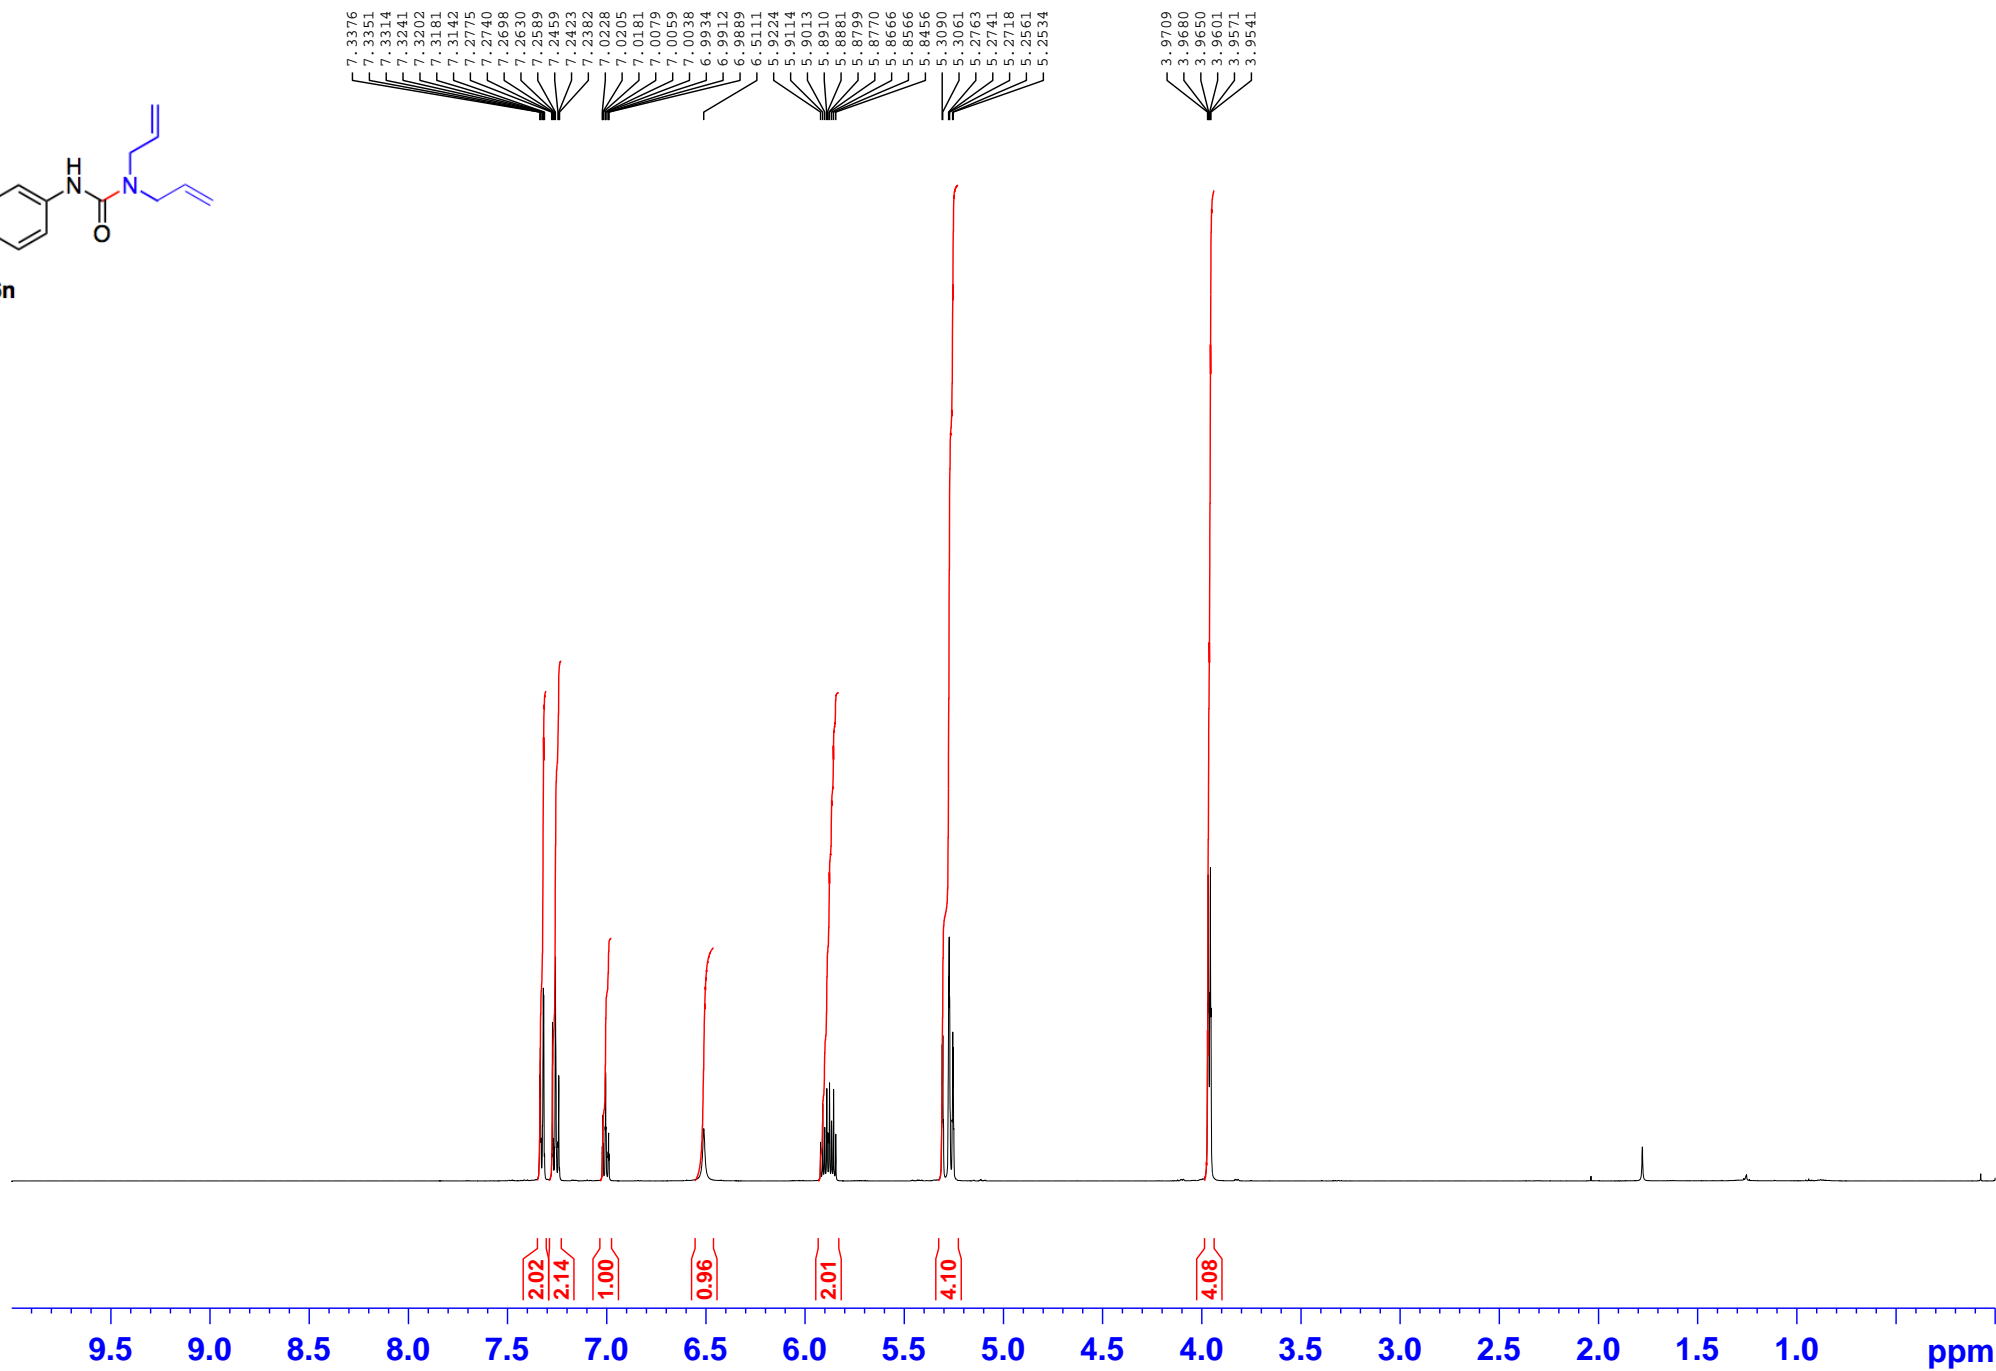

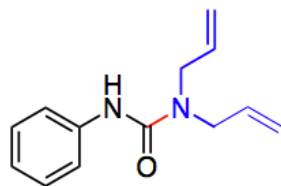

6n

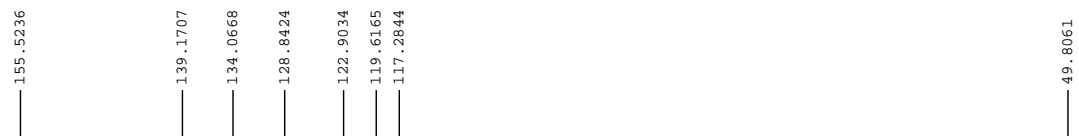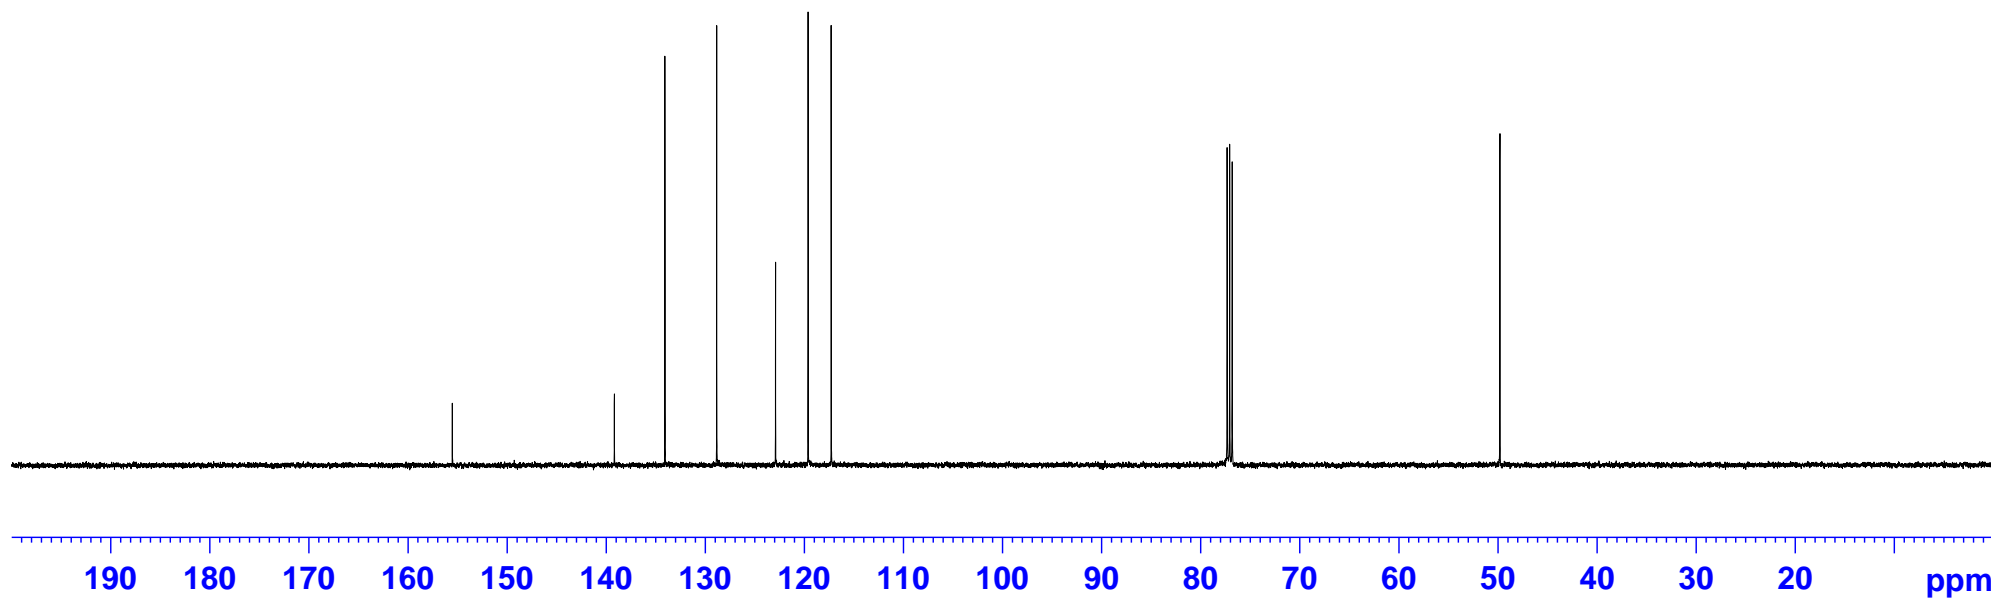

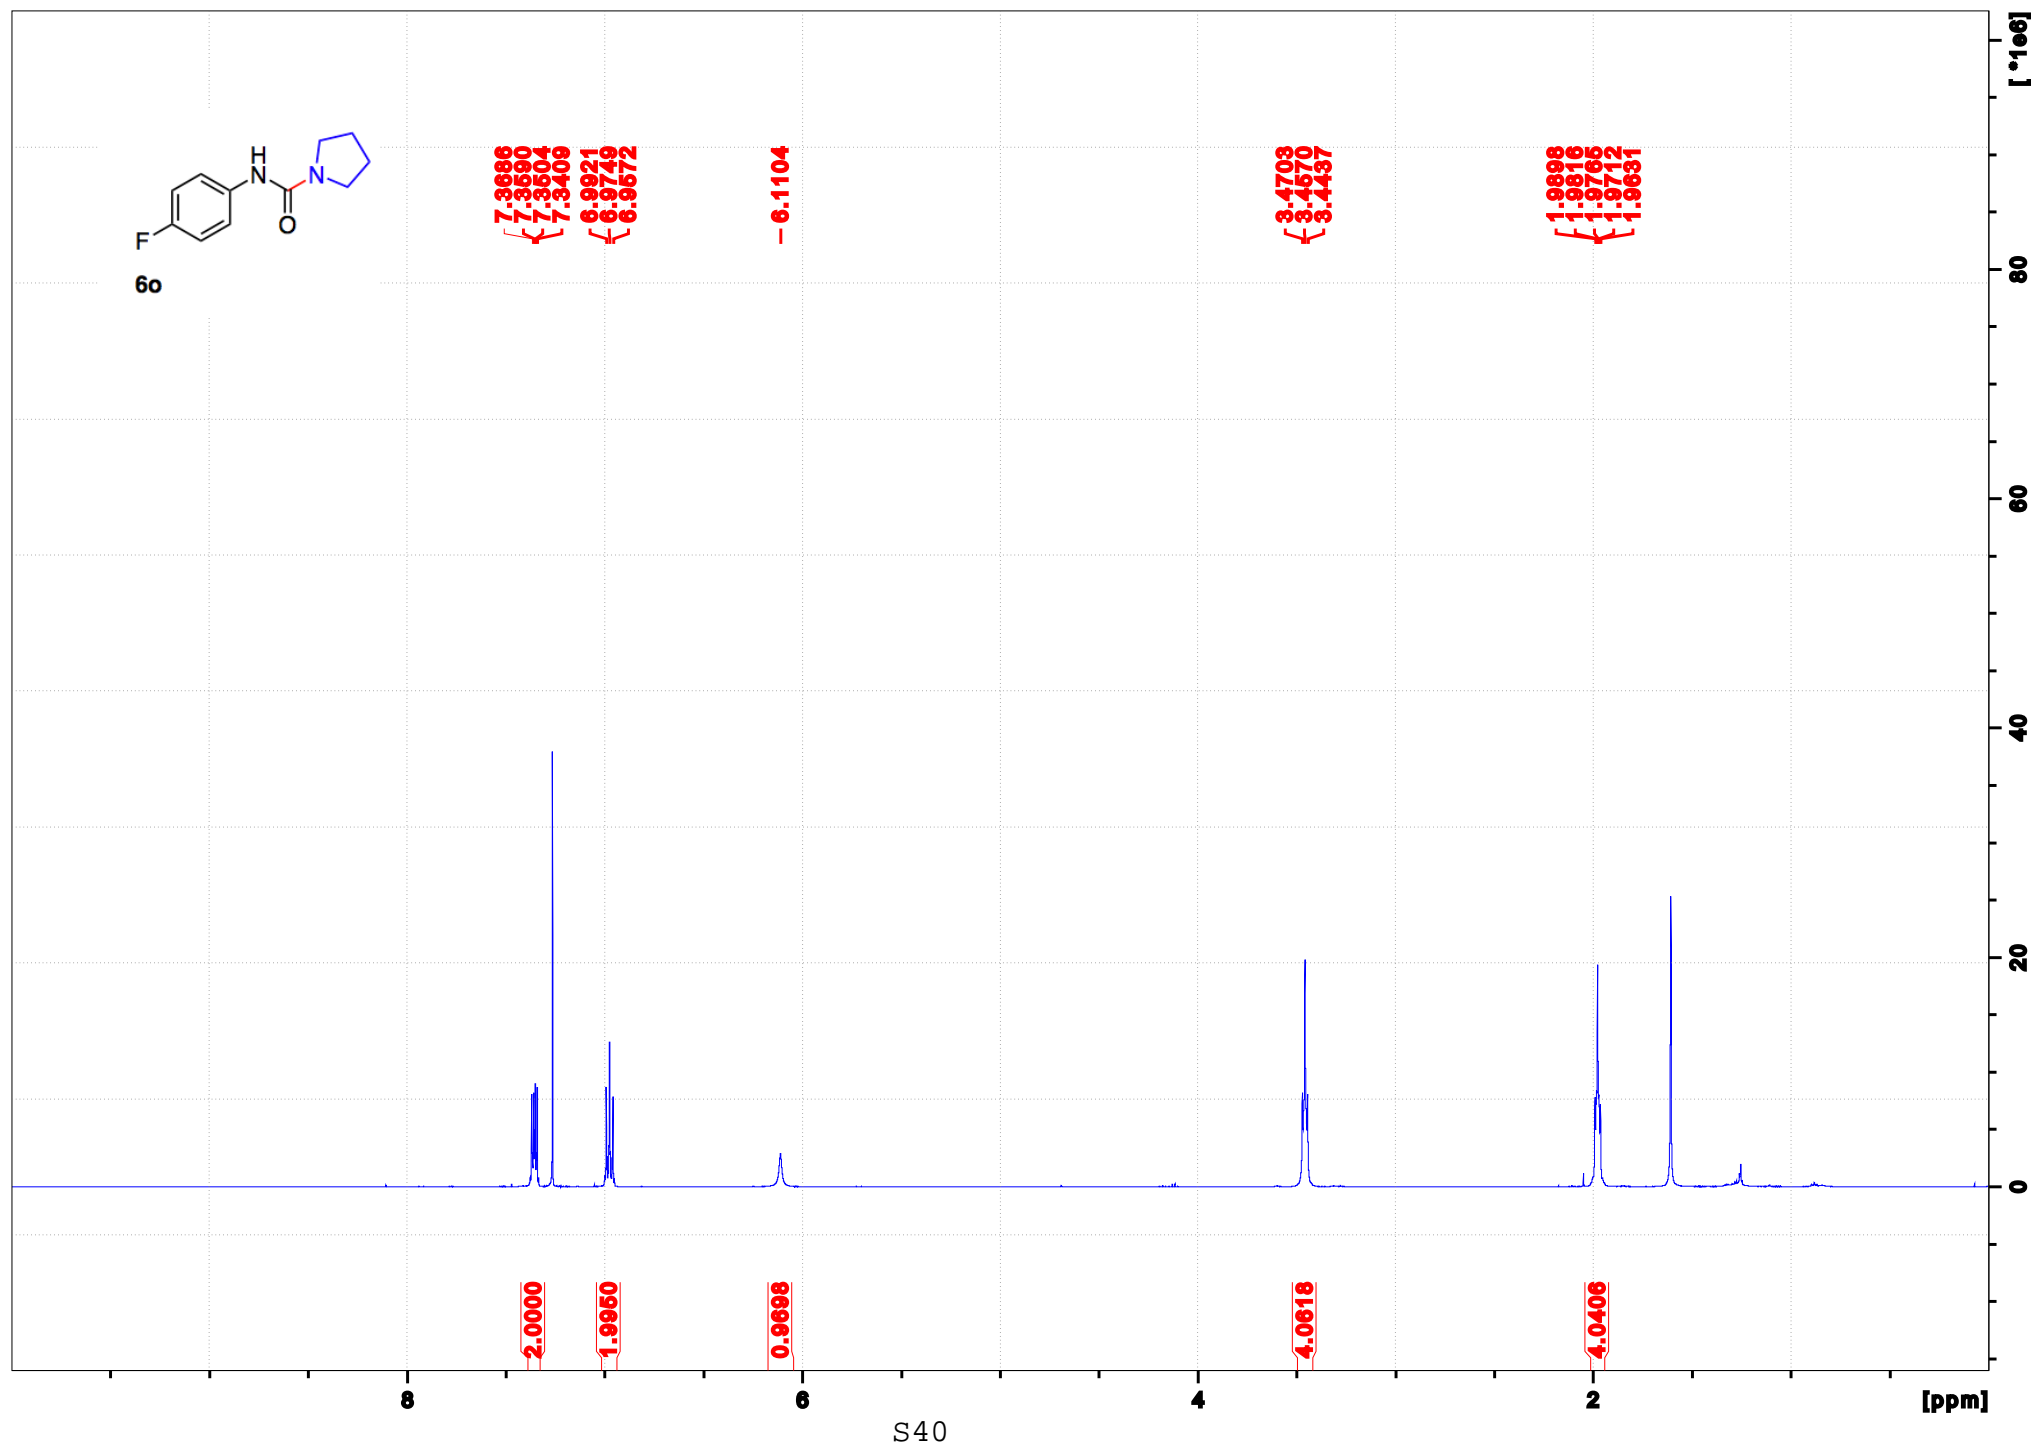



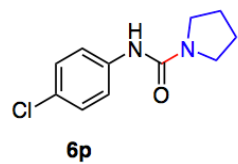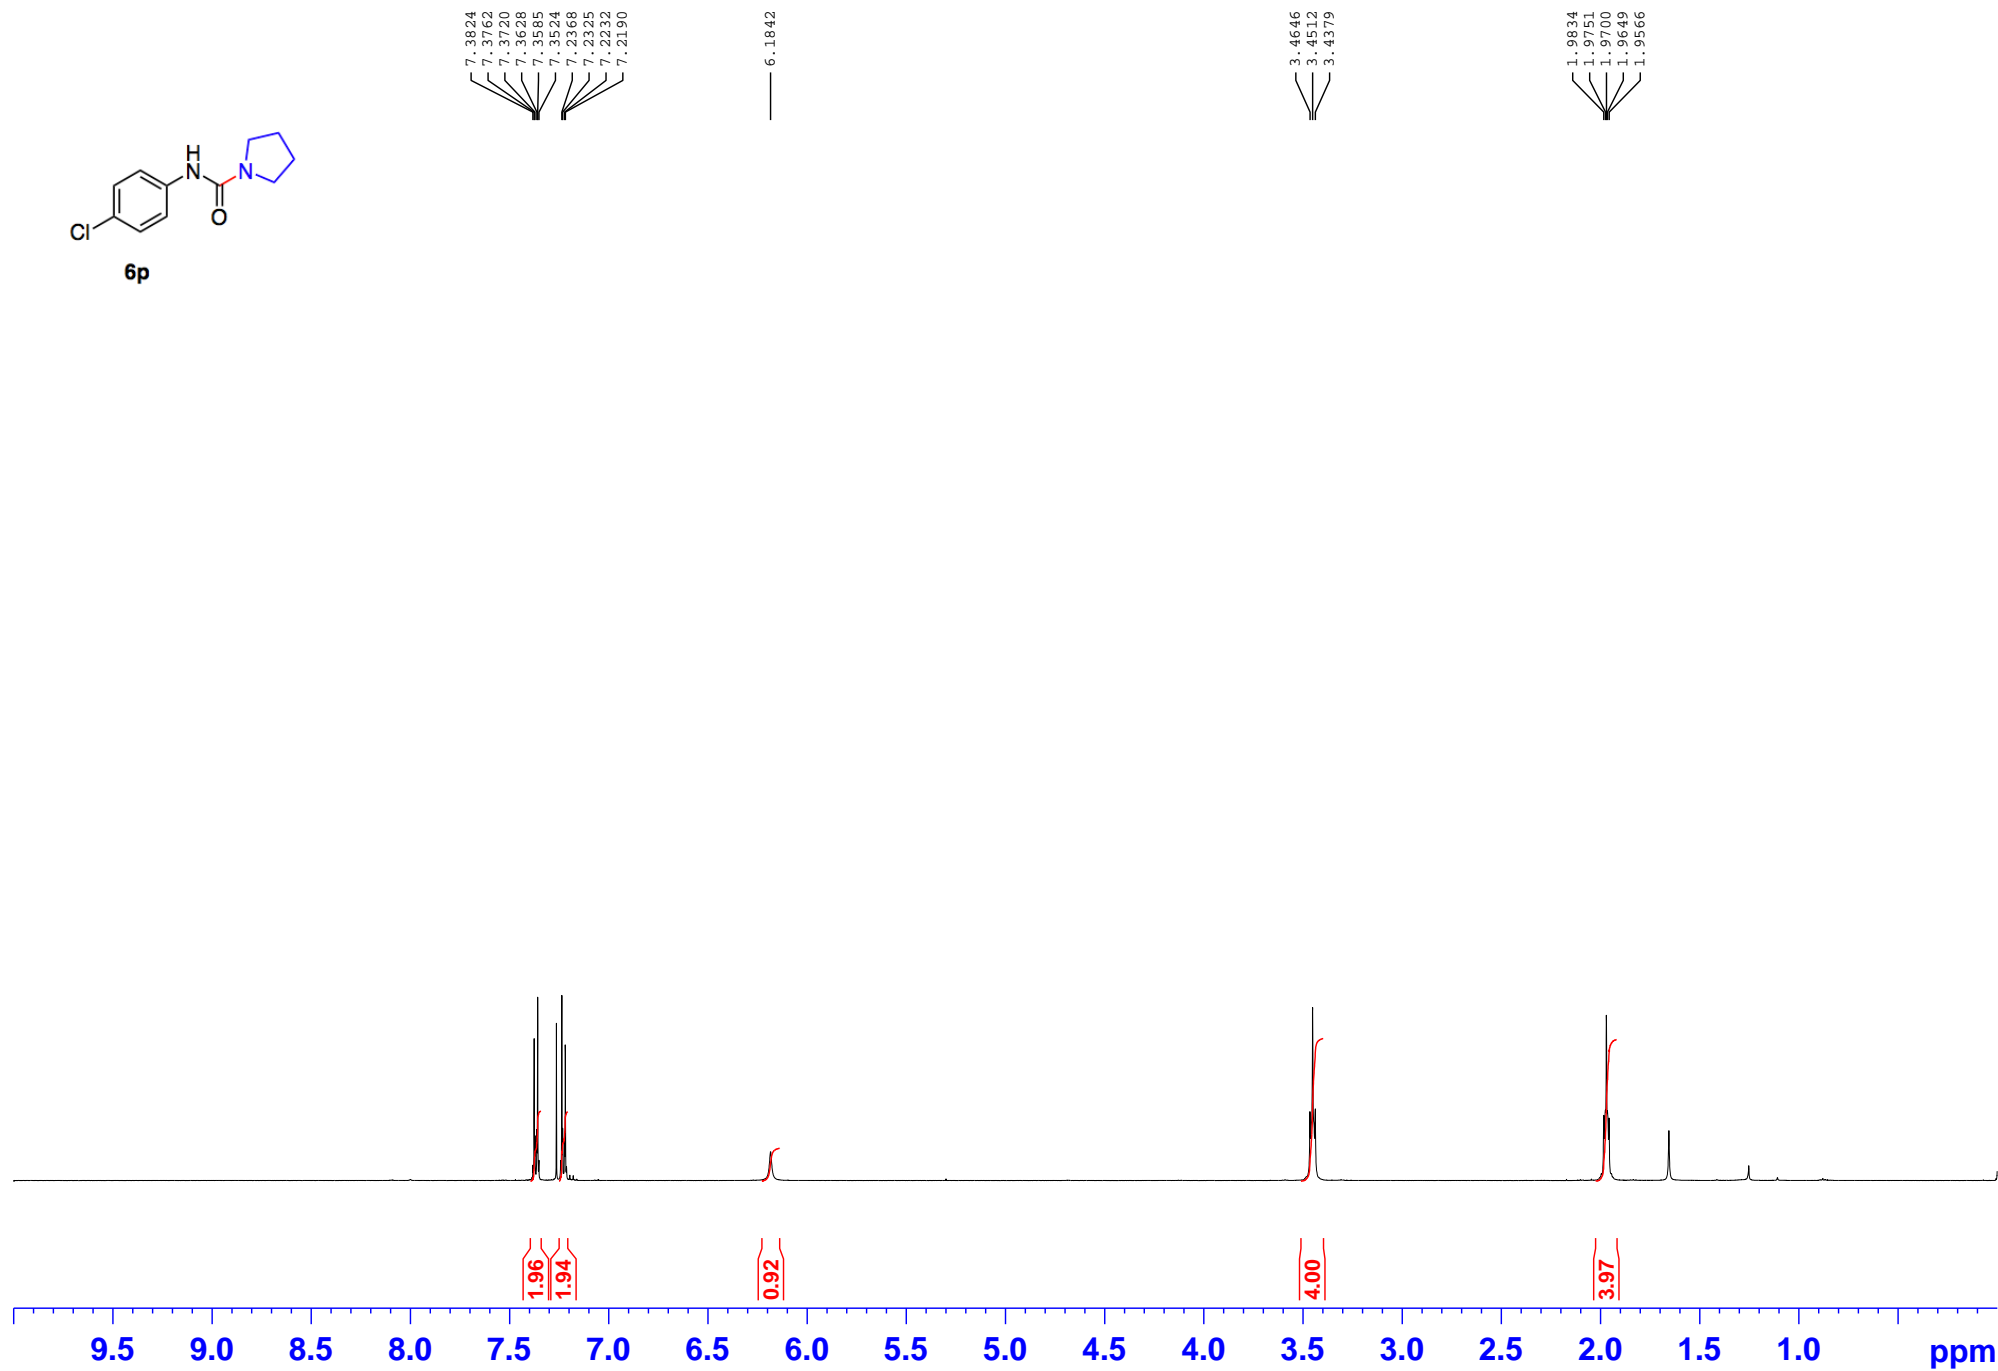

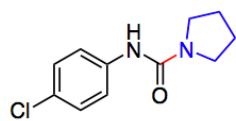

6p

153.6662

137.8424

128.8008

127.6152

120.6652

45.8330

25.6119

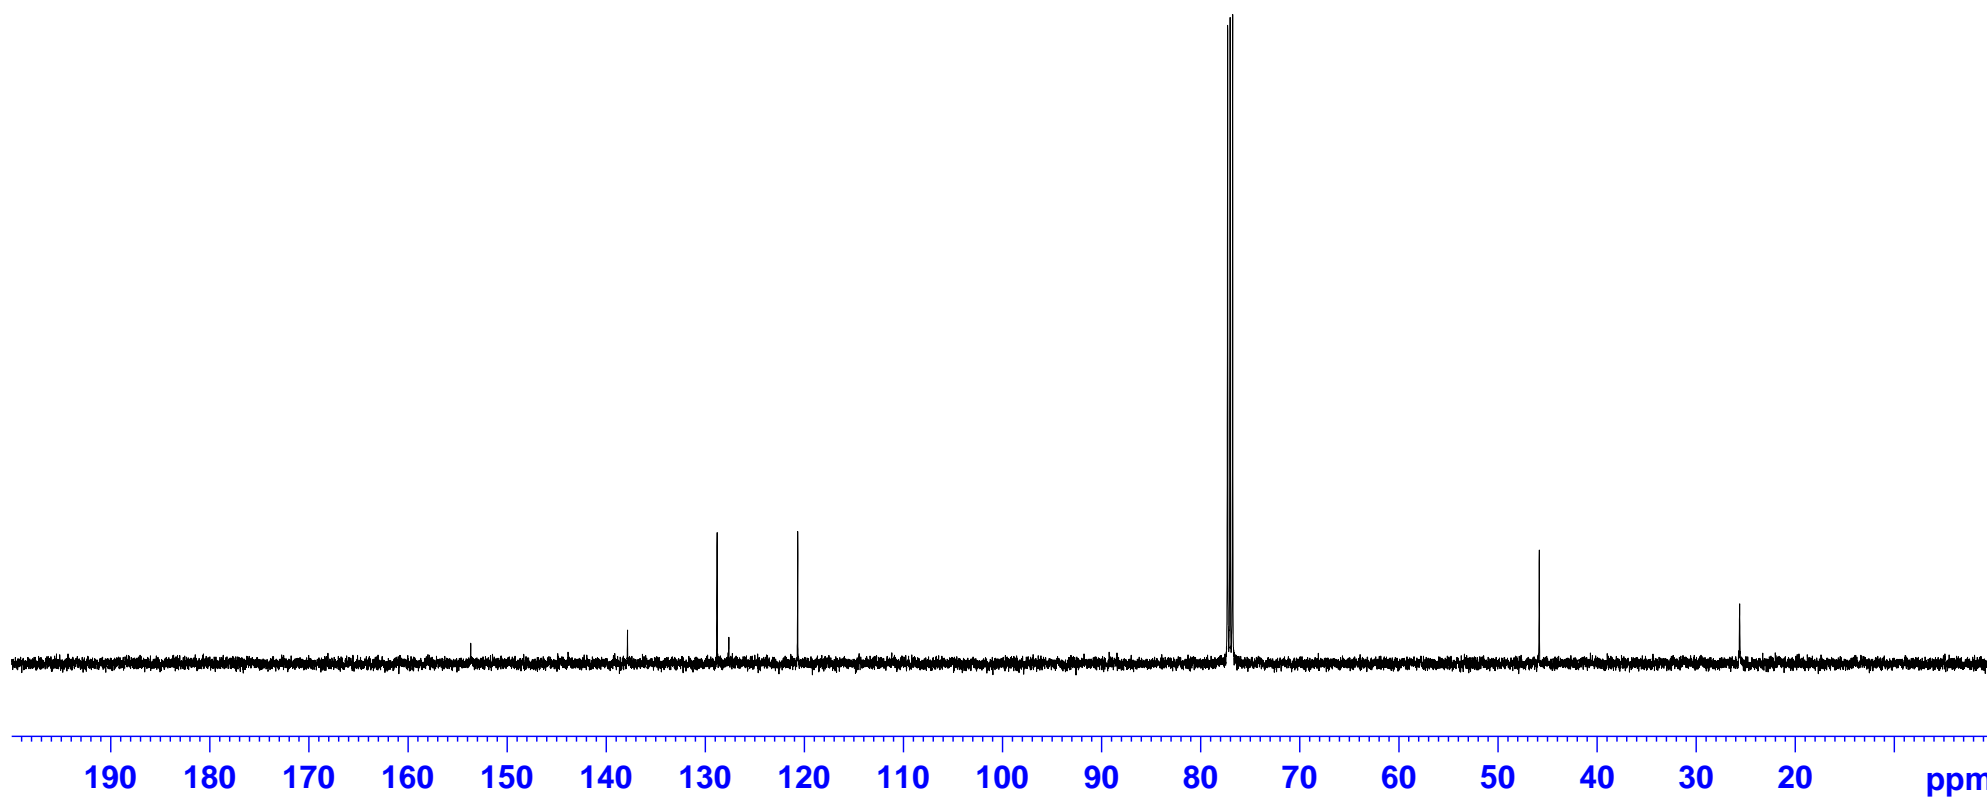

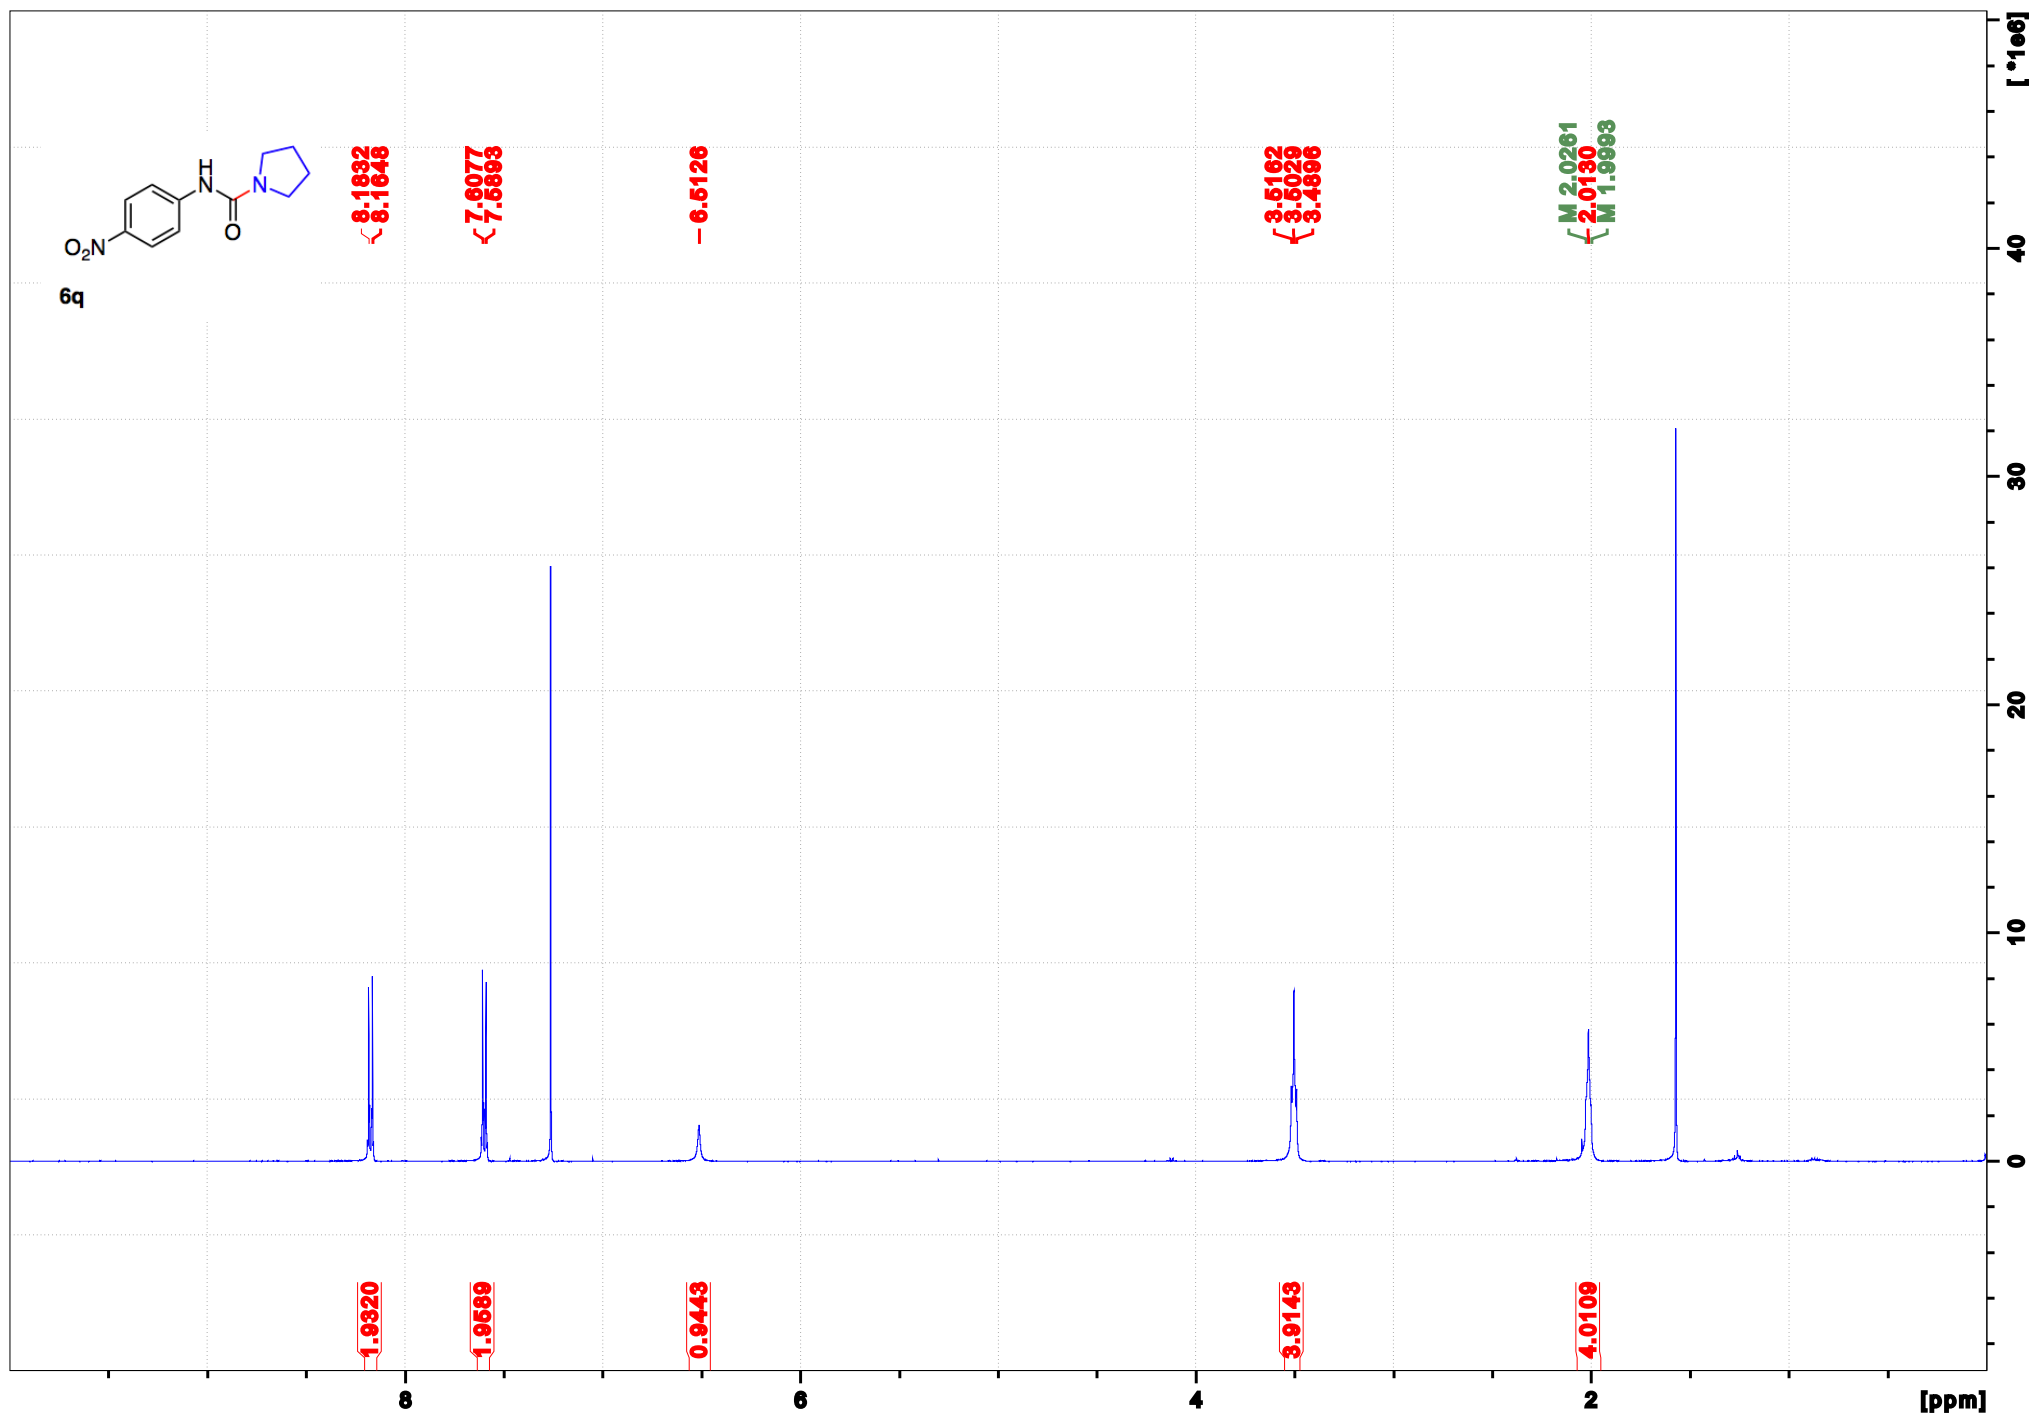

S43

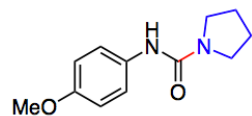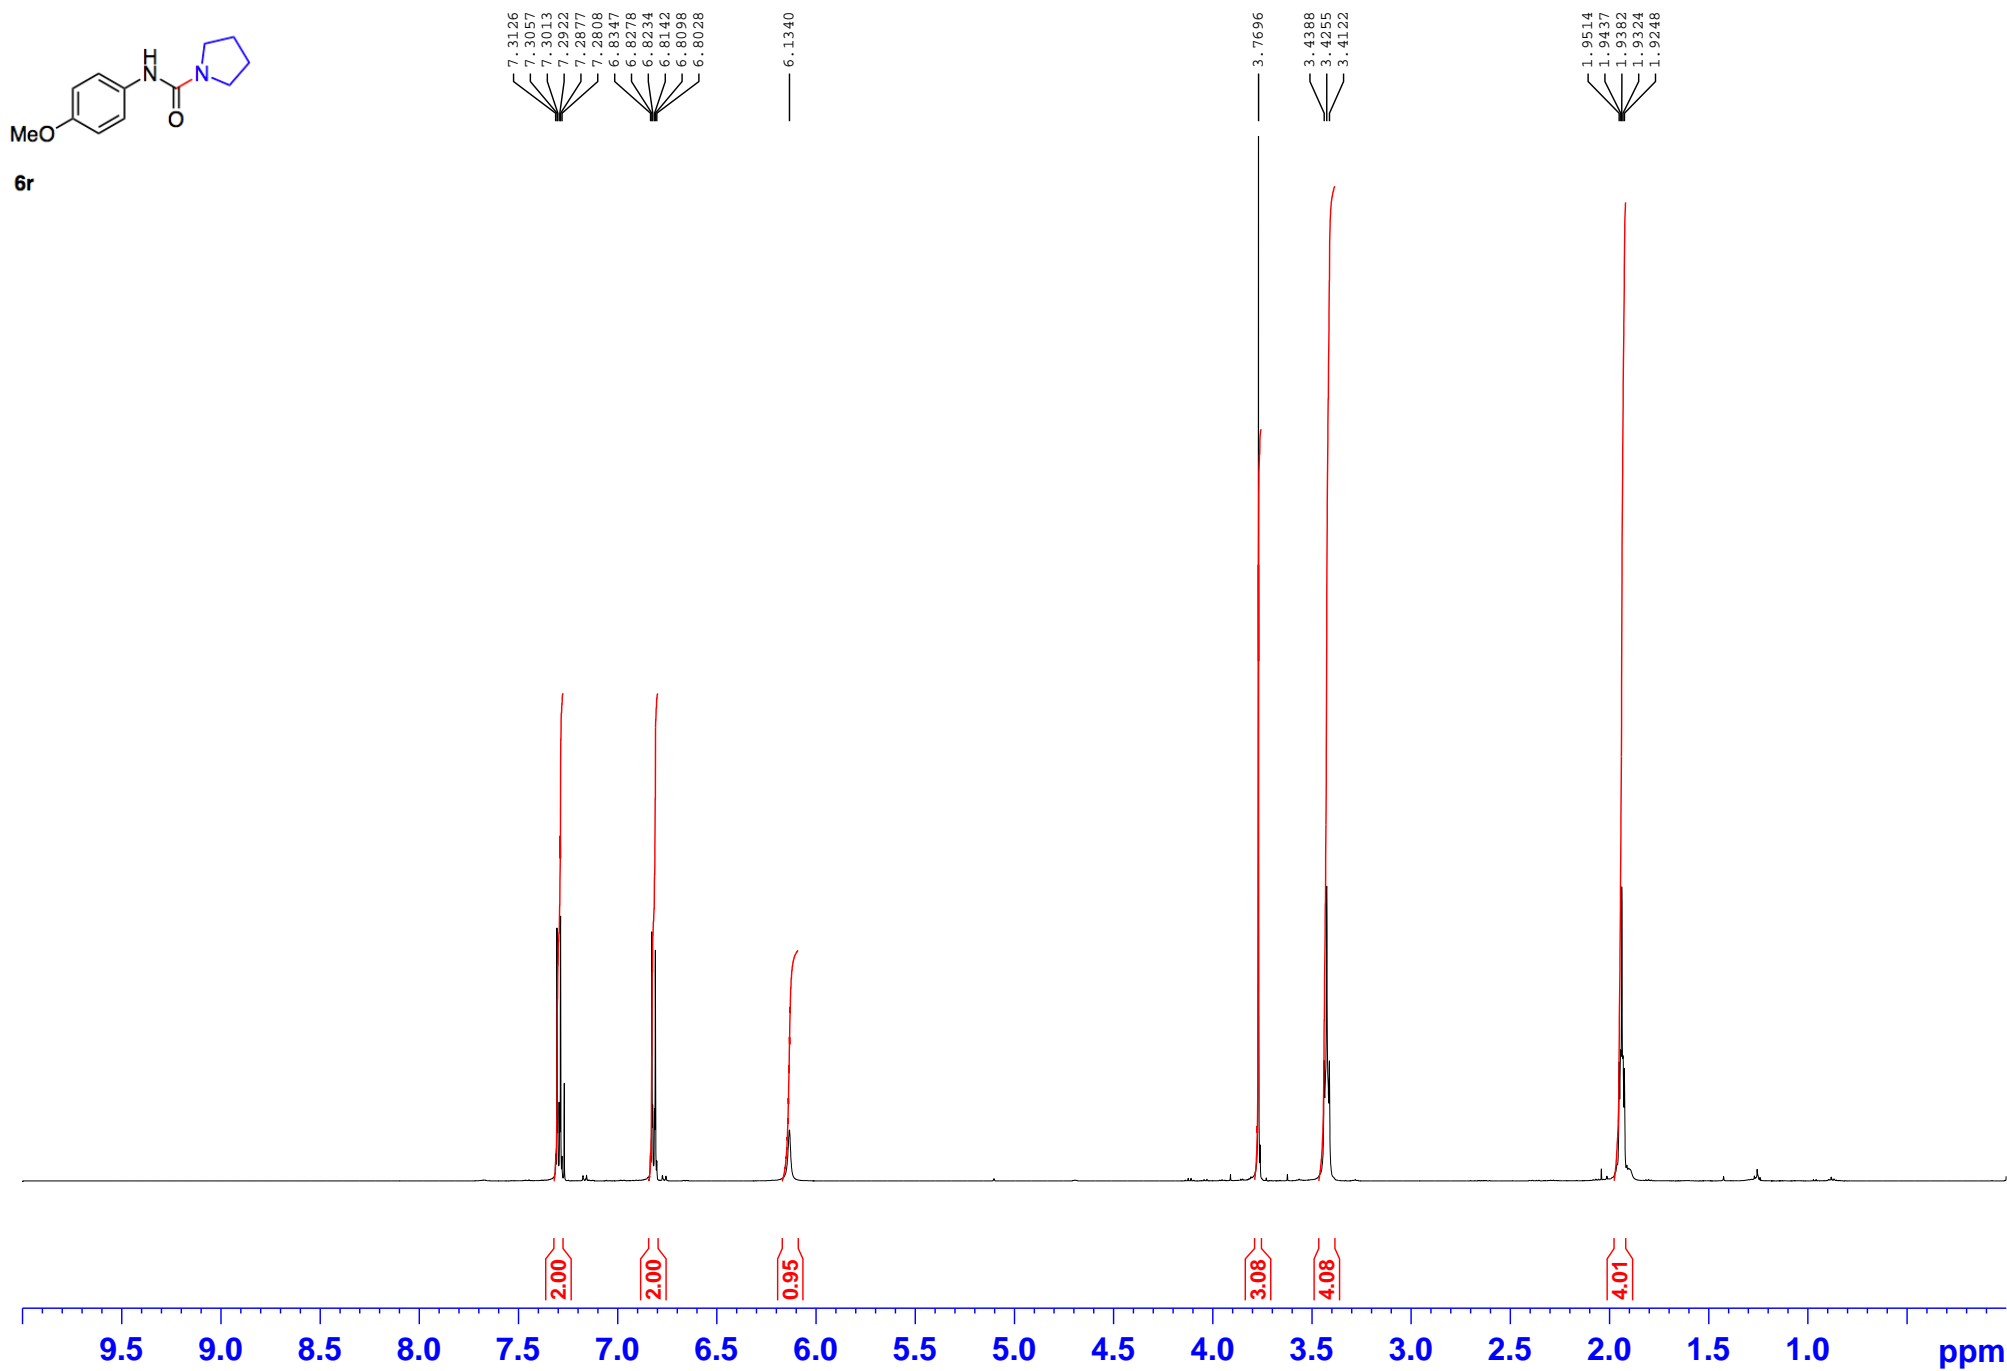

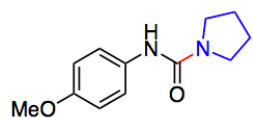

6r

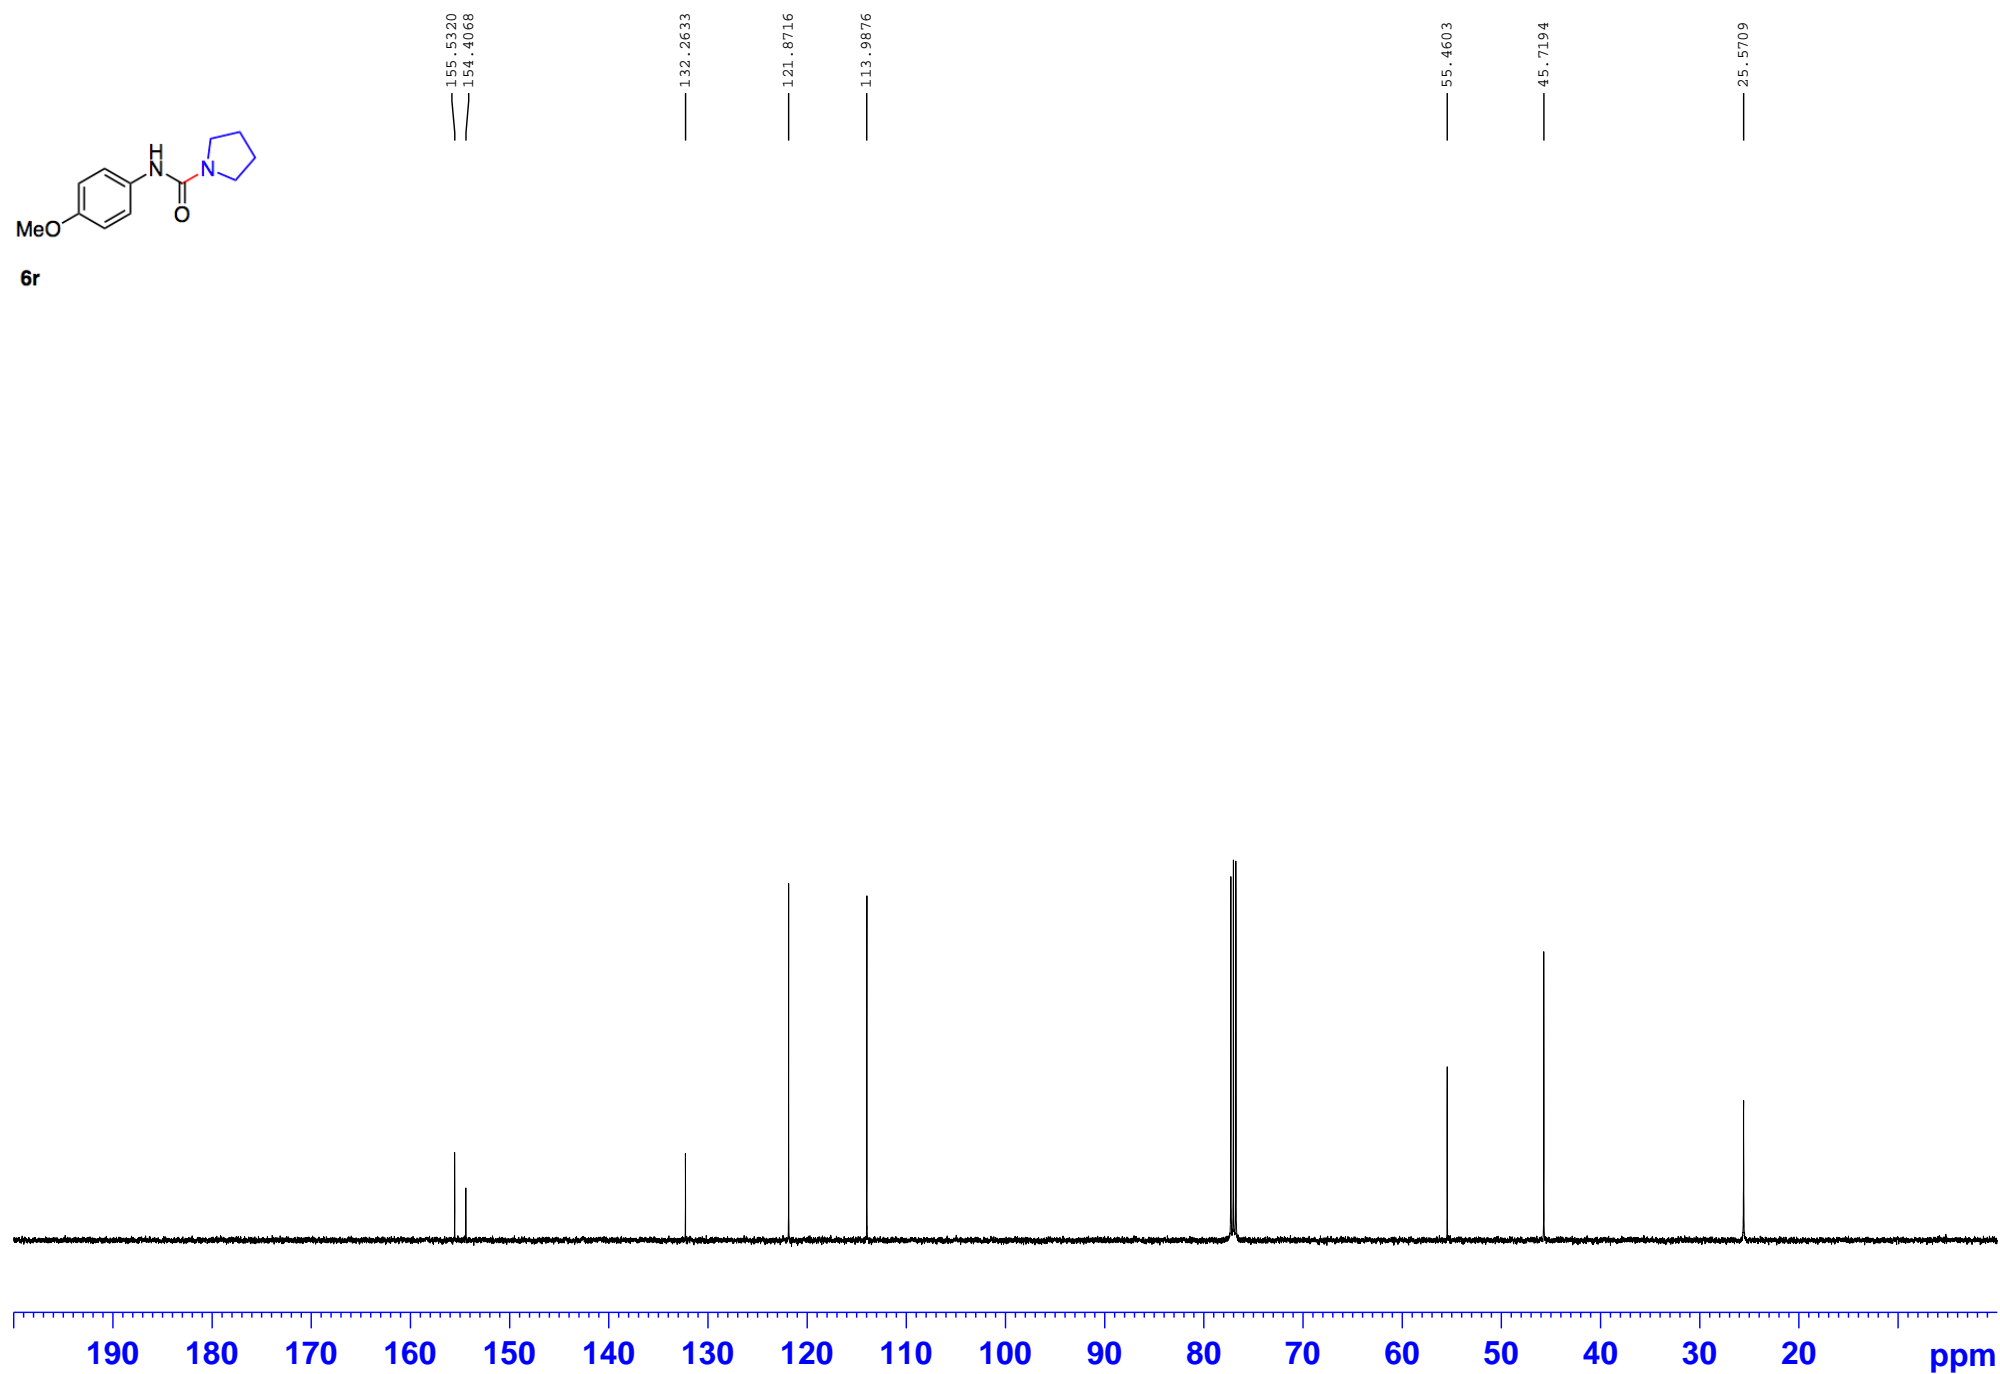

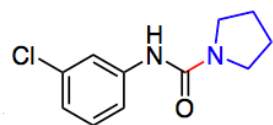

6s

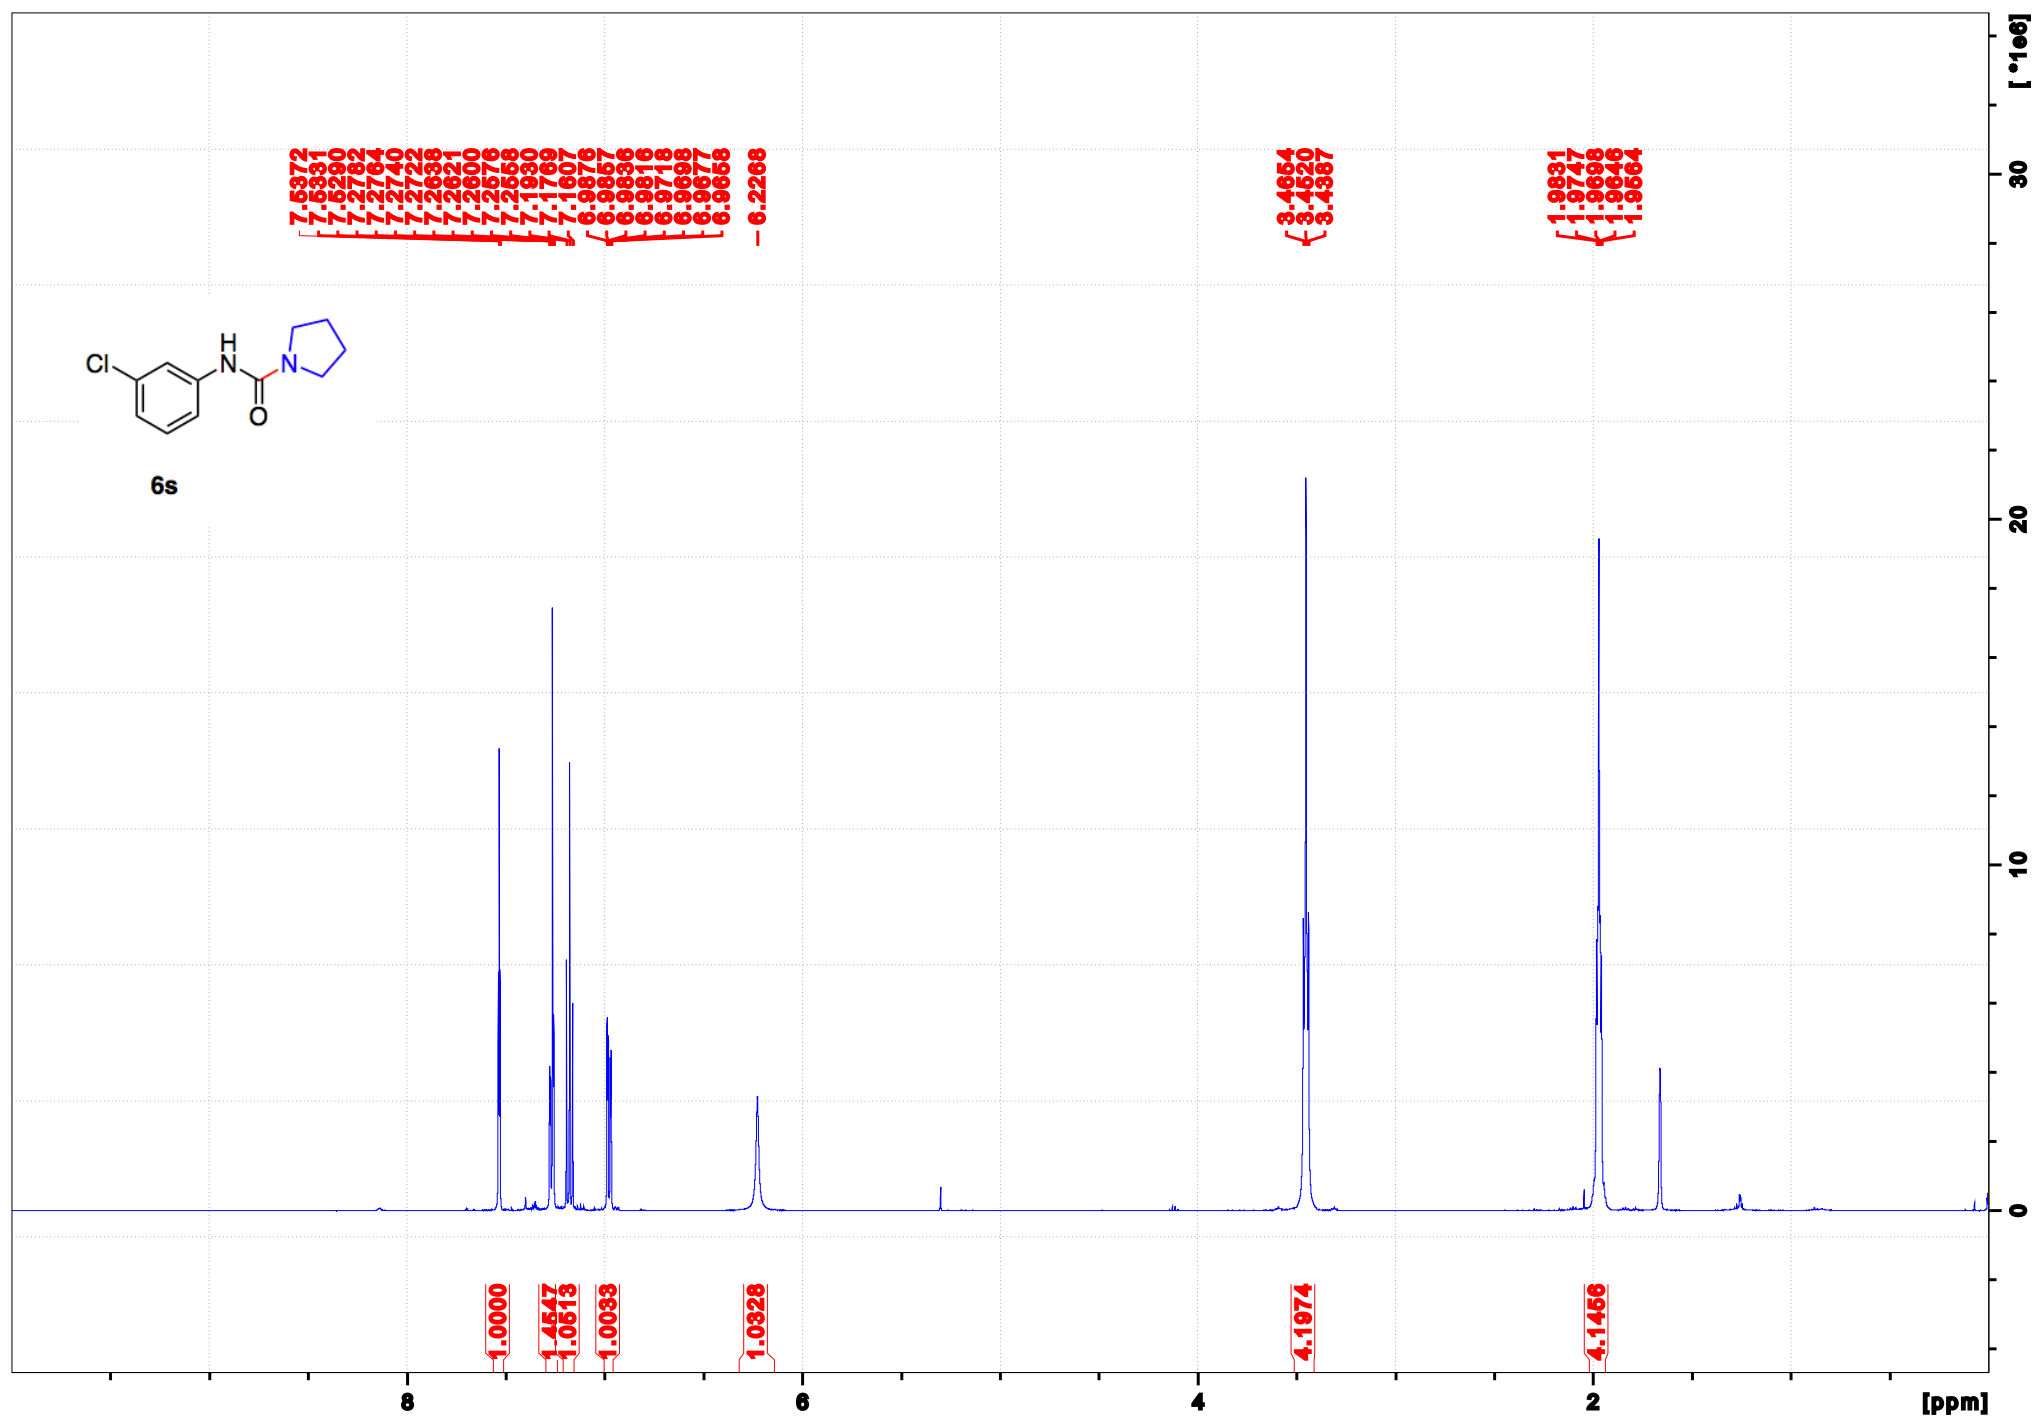

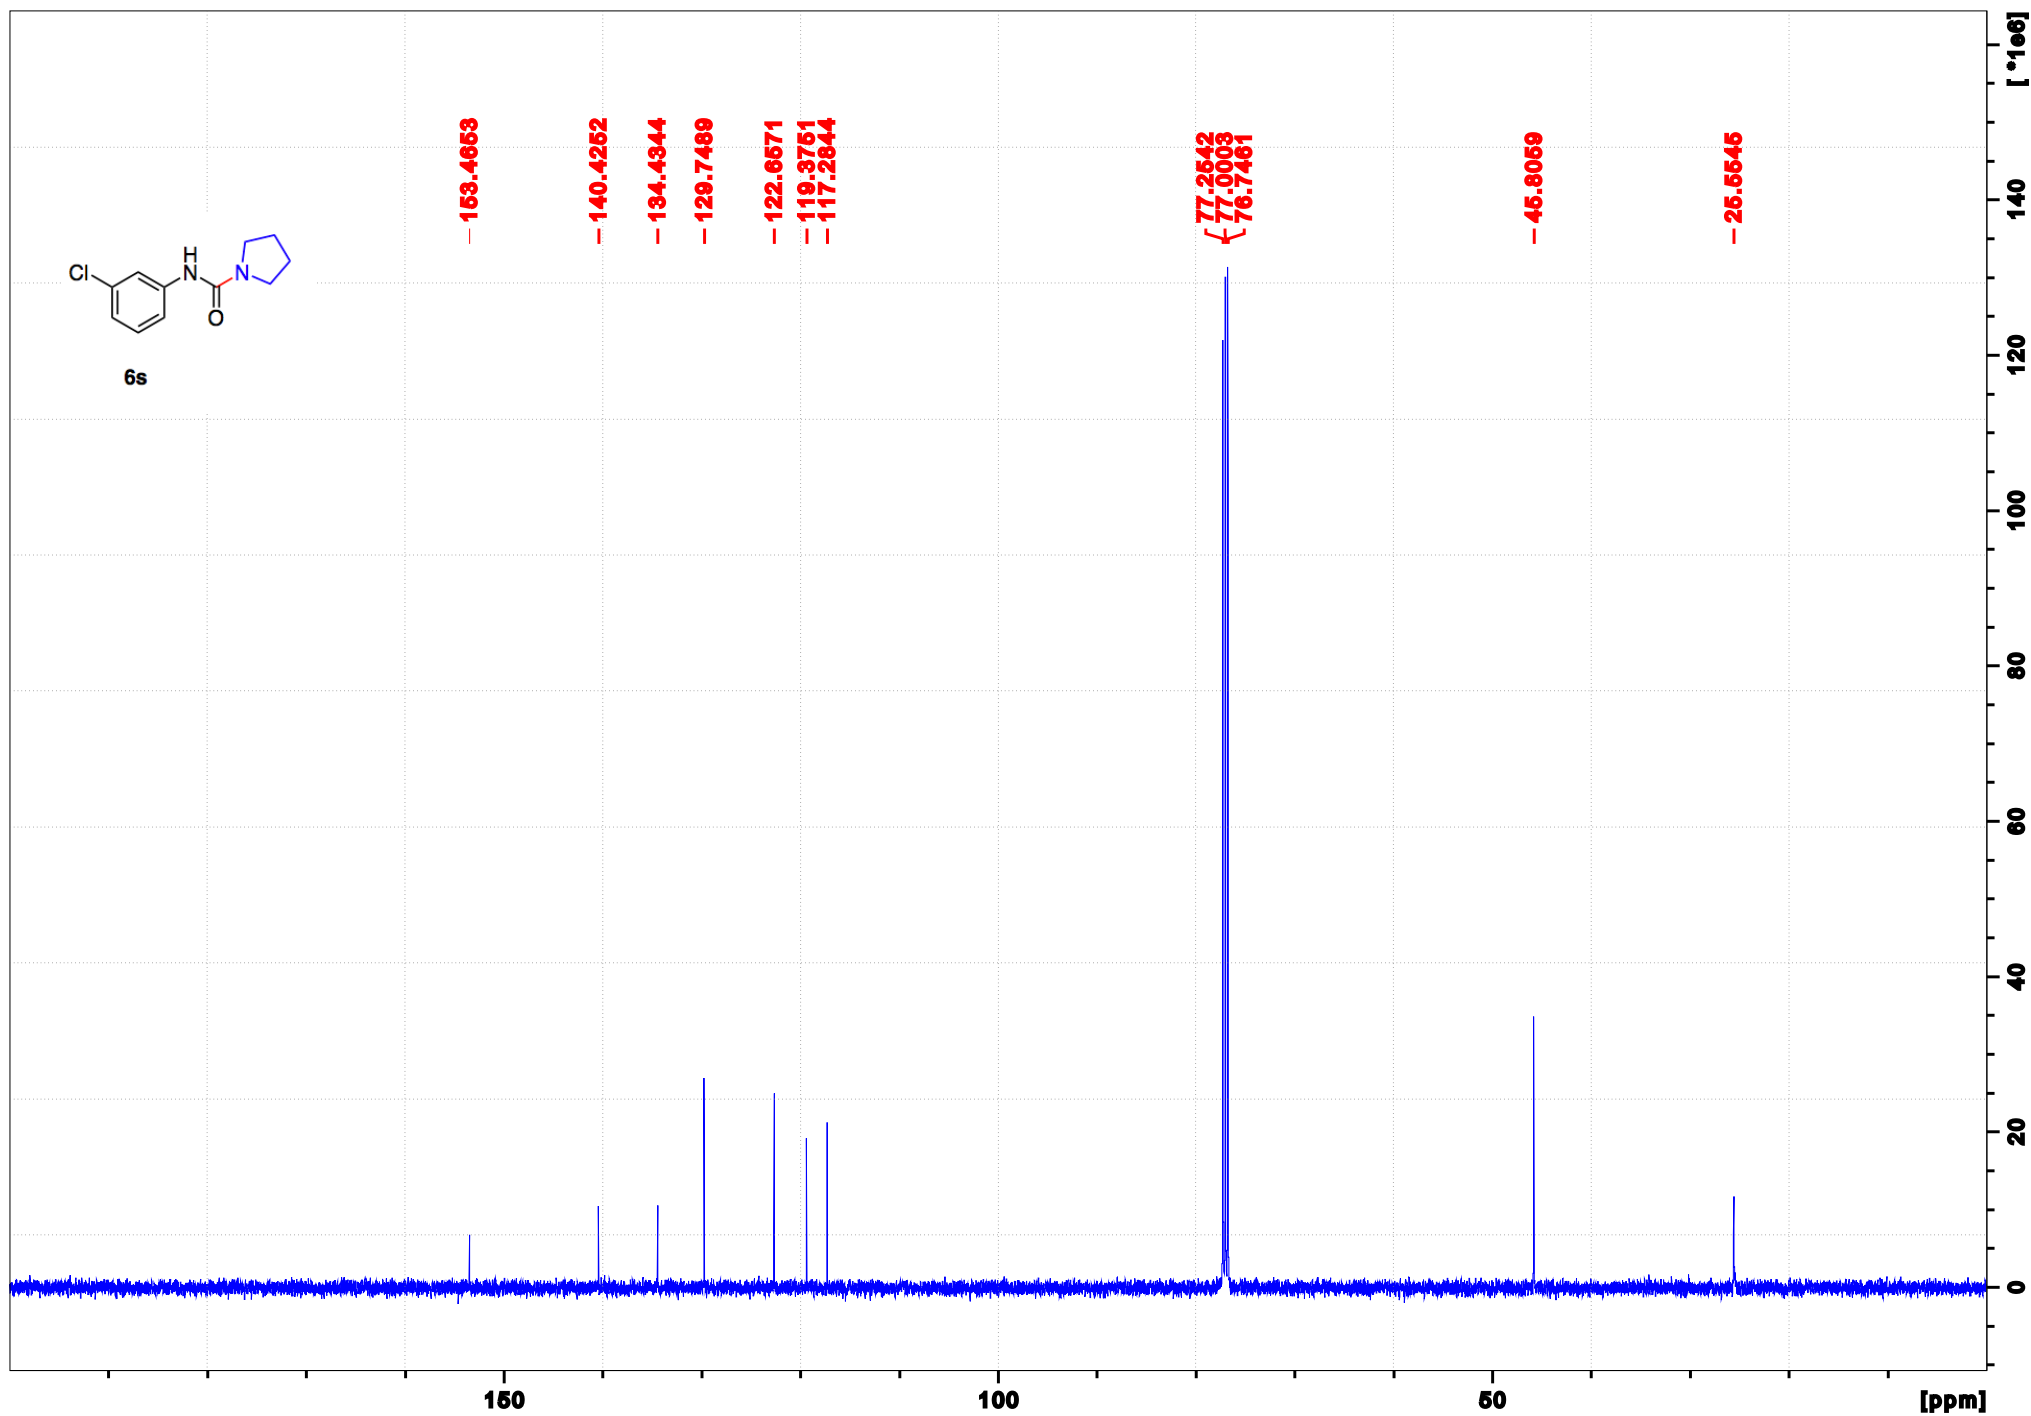

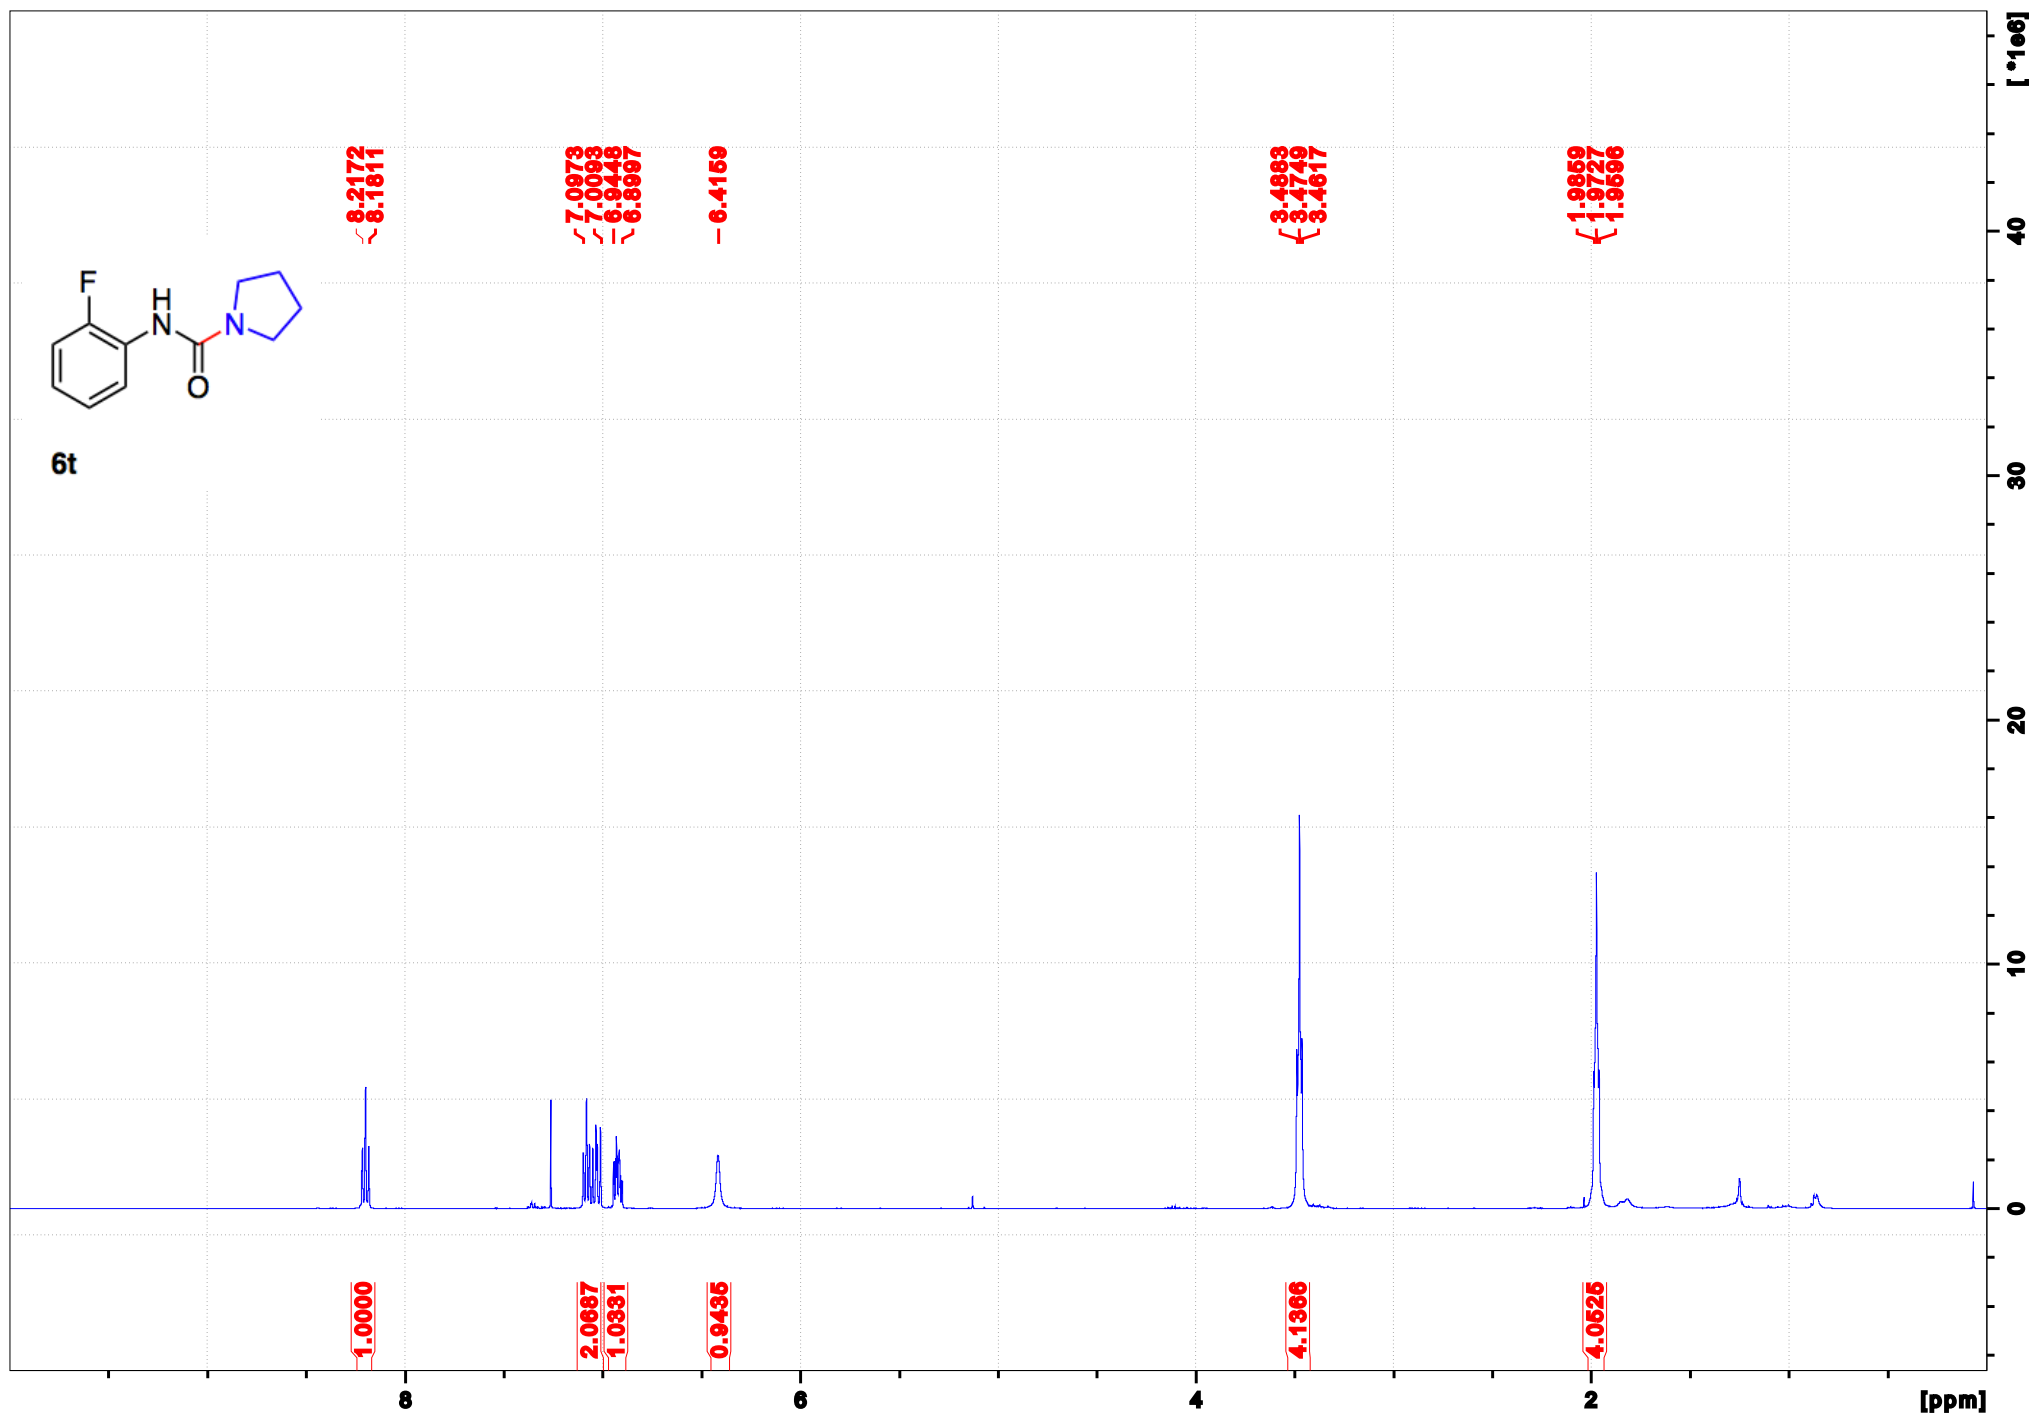



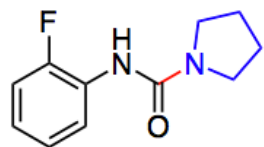

6t

163.3031  
161.2161

127.8026  
124.4738  
122.2967  
120.9116

114.4280

45.7335

25.5410

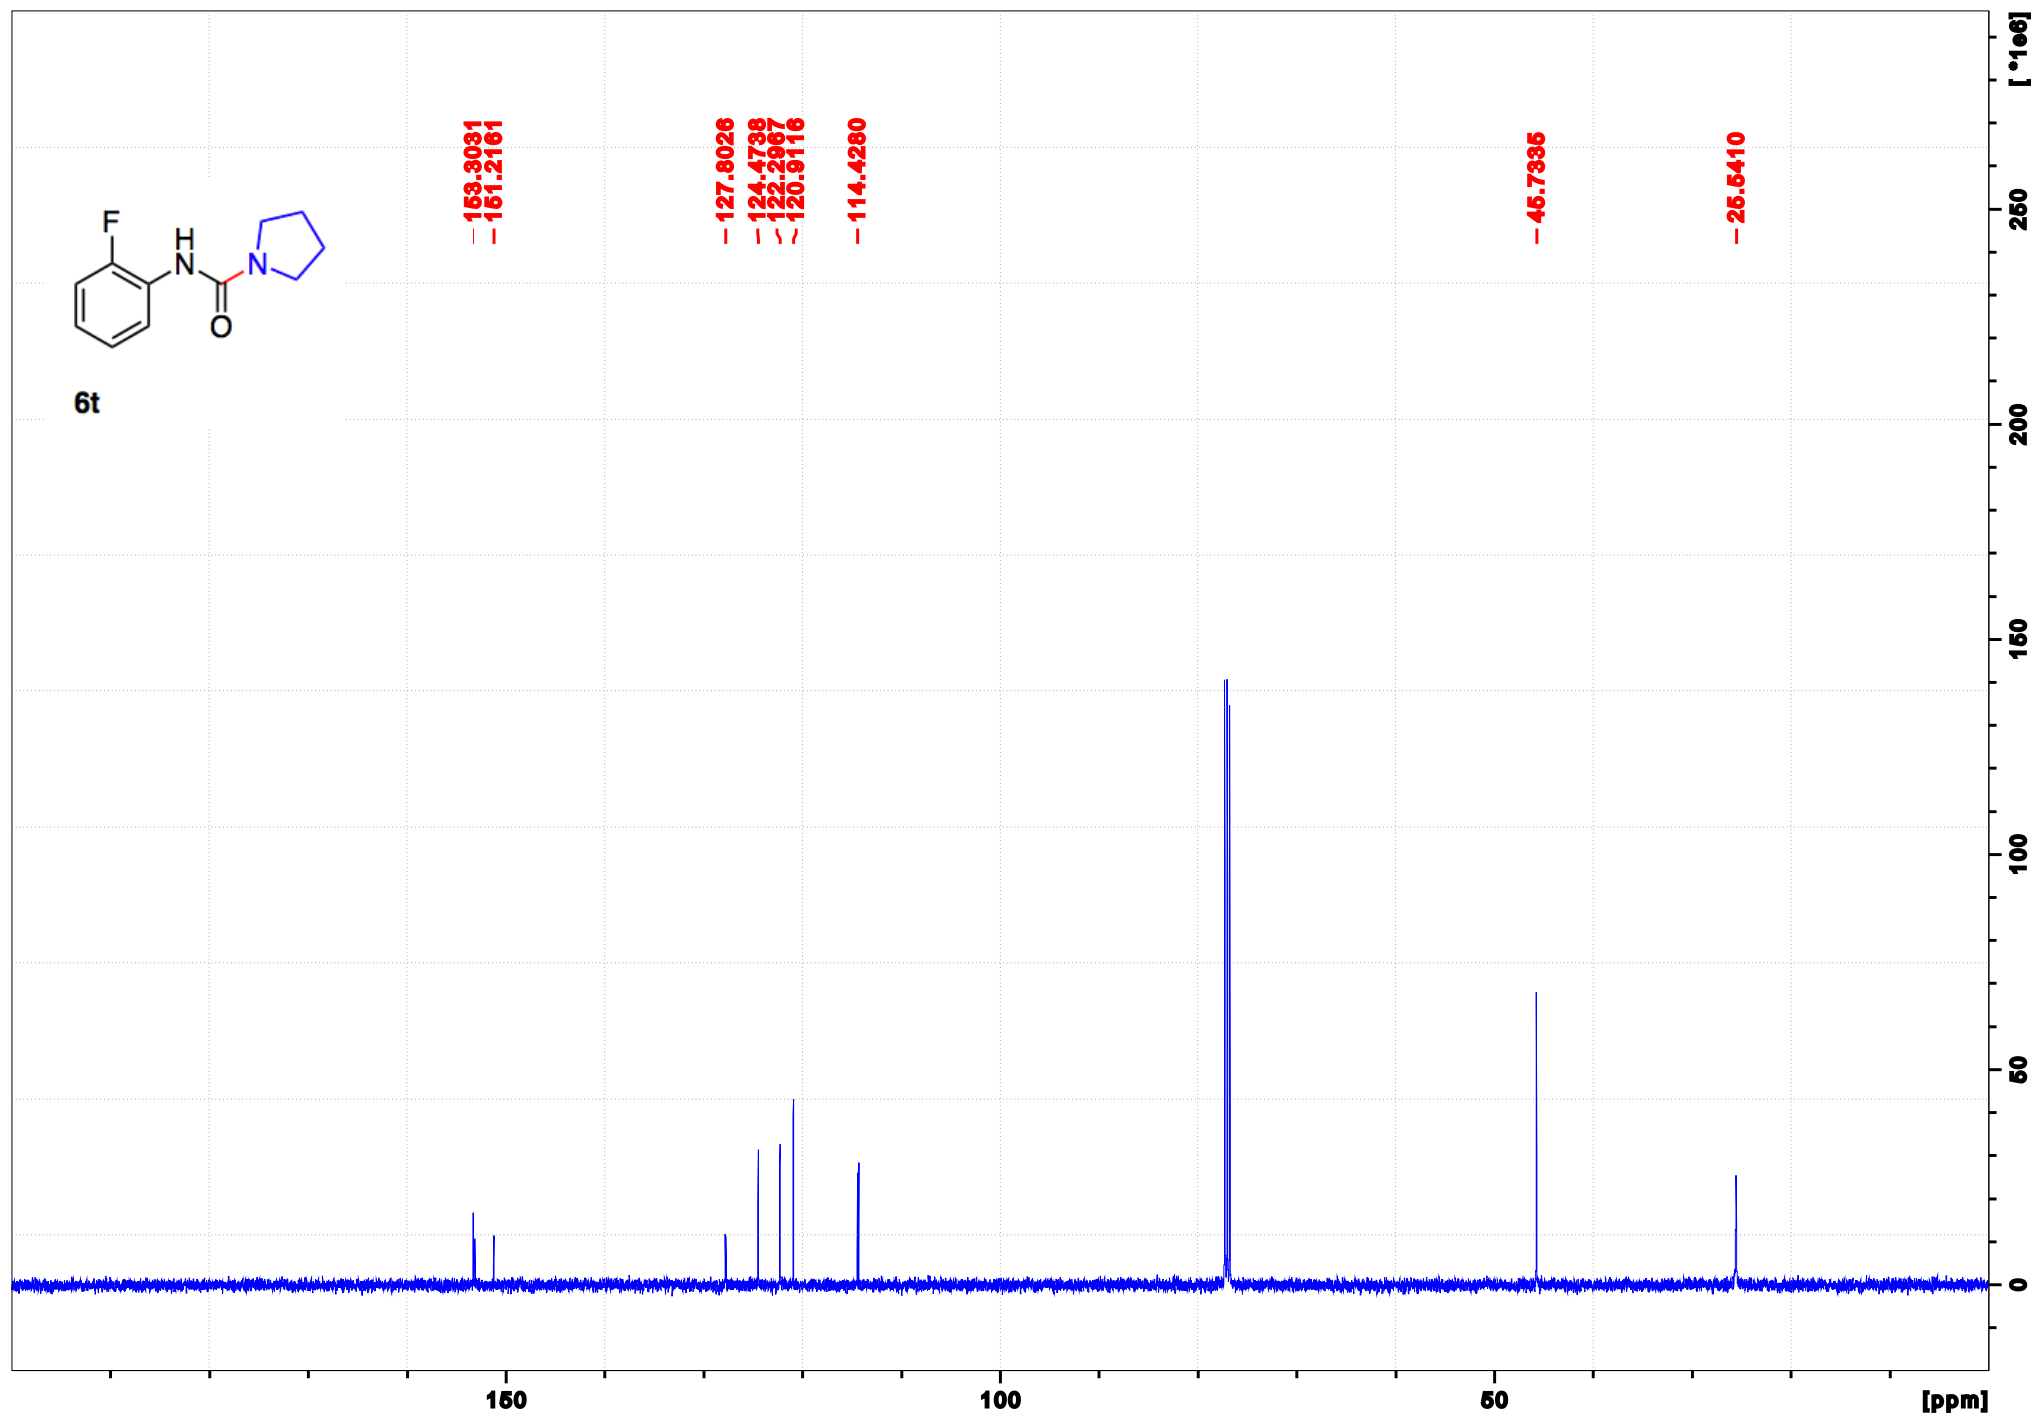

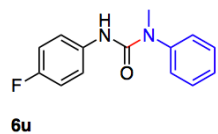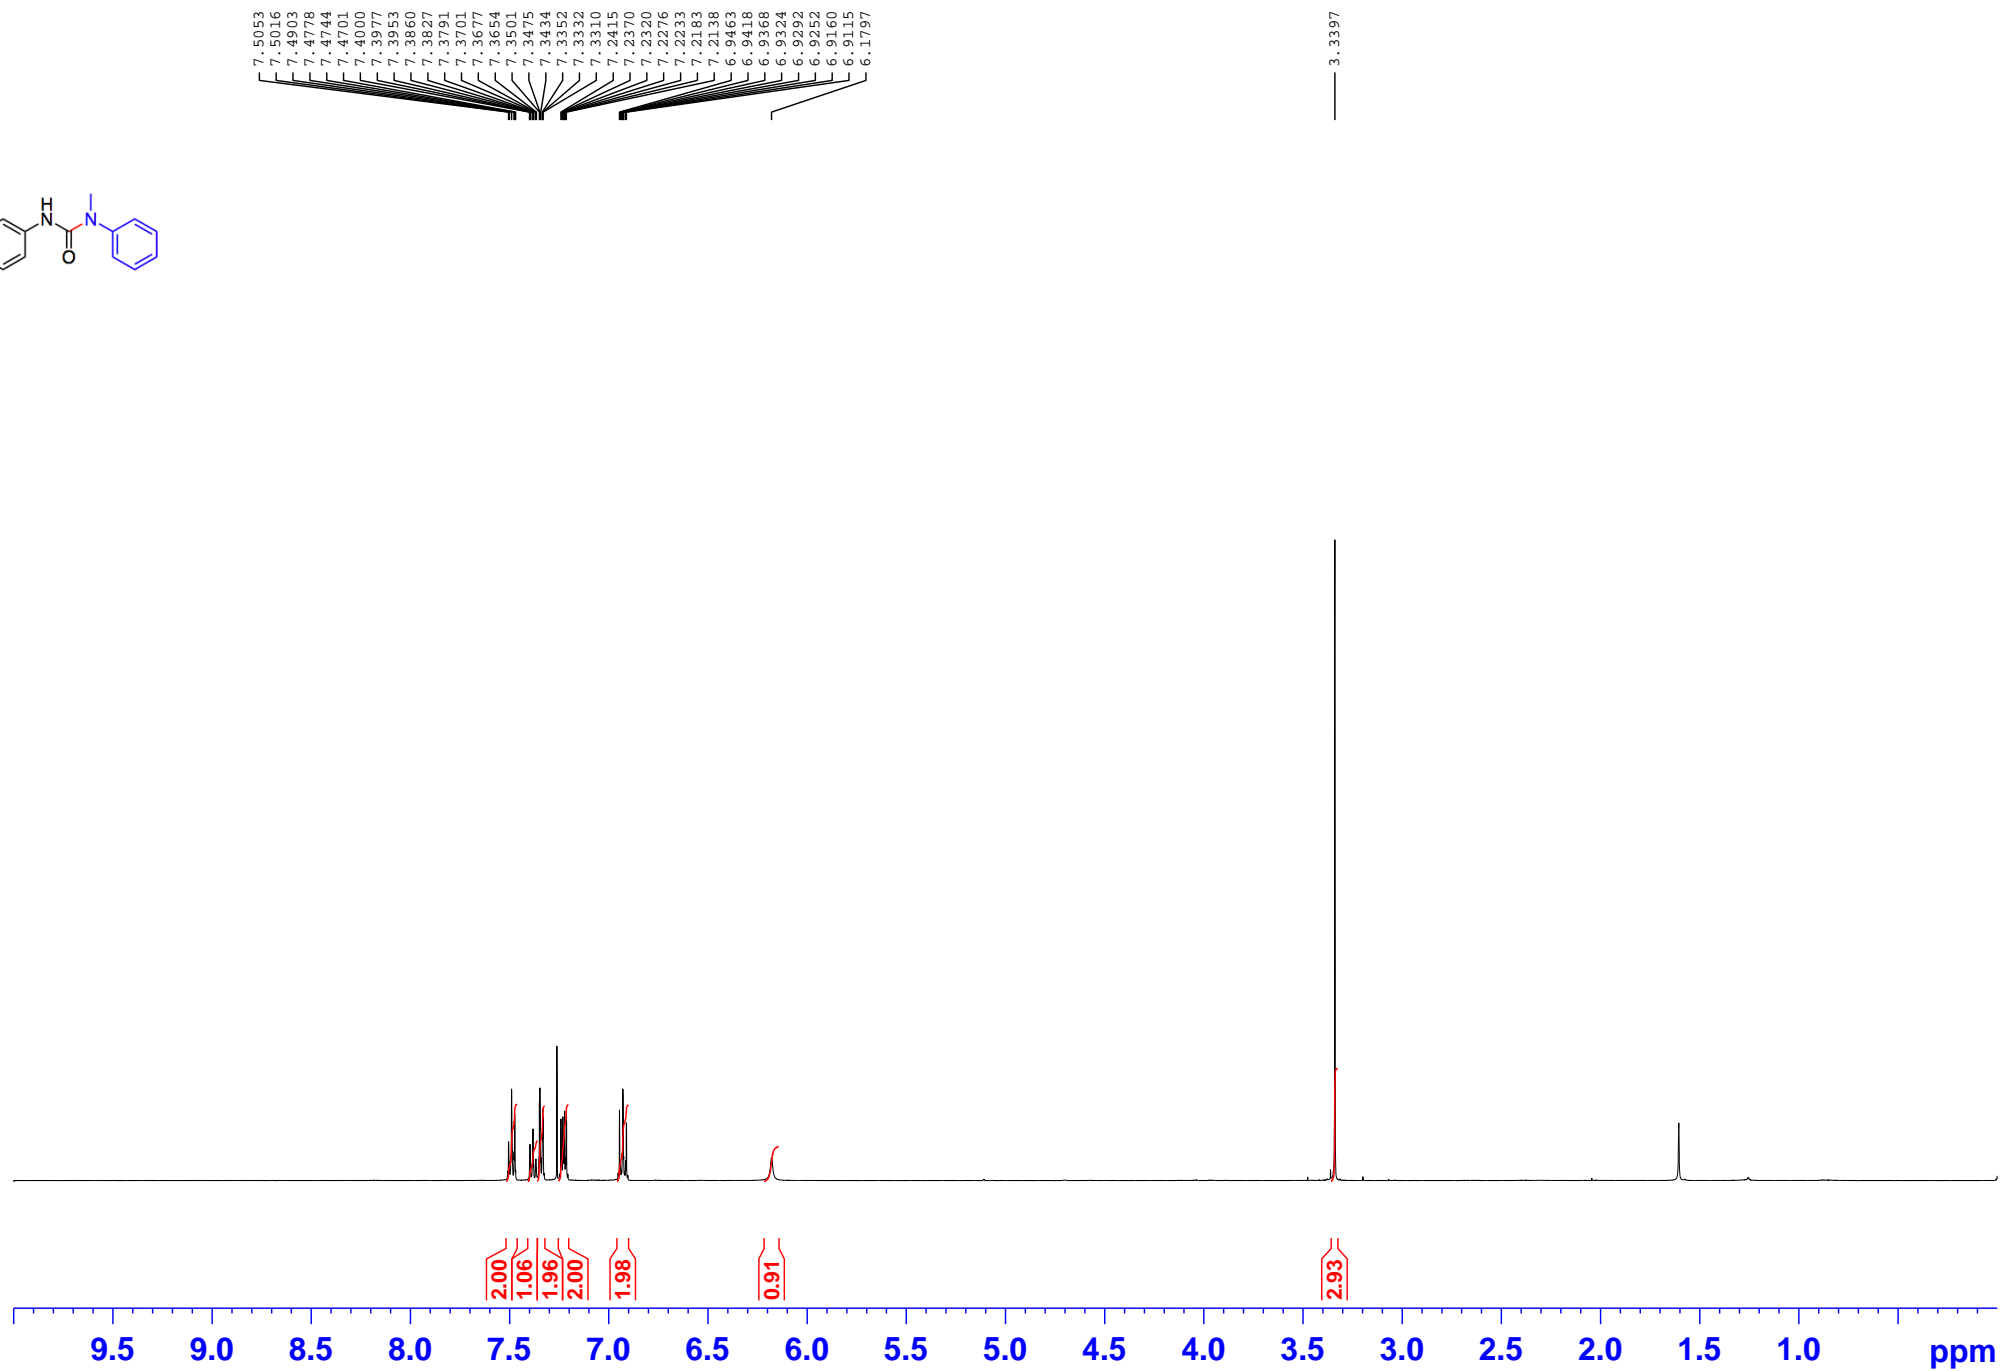

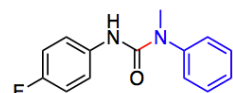

6u

— 159.6784

— 154.4913

— 142.7821

— 134.7339

— 130.3631

— 127.9307

— 127.4446

— 121.1279

— 115.2251

— 37.2572

250 [°1e6]

200

150

100

50

0

150

S51

100

50

[ppm]
